# Supplementary material
Source: publisher figshare collection journal article supplement (https://gsajournals.figshare.com/ndownloader/files/30591006)
Supplement: Supplementary file 1 [file 30591006]

## Sheet: Figure S3
	abs_frame	X_px	Y_px	channel	slice	frame	xmin	ymin	xmax	ymax	narea	integintch1	integintch2	colocch1	colocch2	colocindch1	colocindch2	index	animal	genotype
1	1	337.693	486.698	1	1	1	336	485	339	488	3	1273	913	1	0	1	0	1	20210730_759_3.tif	BOX759		--- ComDet plugin version 0.5.4 ---
2	1	346.912	536	1	1	1	345	535	349	537	3	1061.75	6.5	1	0	2	0	2	20210730_759_3.tif	BOX759		Number of channels: 2
3	1	353.158	488.221	1	1	1	351	486	355	490	6	3966.25	2347	1	0	3	0	3	20210730_759_3.tif	BOX759		Detection parameters
4	1	355.614	531.205	1	1	1	354	529	357	533	5	1173.86	1469.71	1	0	4	0	4	20210730_759_3.tif	BOX759		Channel: 1
5	1	363.376	530.675	1	1	1	362	529	365	532	3	1060.67	822.667	1	0	5	0	5	20210730_759_3.tif	BOX759		Include larger particles: false
6	1	368.171	509.986	1	1	1	365	506	371	514	24	36946.5	21286	1	1	6	68	6	20210730_759_3.tif	BOX759		Segment larger particles: false
7	1	369.612	501.381	1	1	1	367	498	372	506	18	31488.7	15133.3	1	1	7	69	7	20210730_759_3.tif	BOX759		Approximate particle size: 3.0
8	1	377.444	512.127	1	1	1	375	510	380	515	13	8179.2	5705.2	1	1	8	70	8	20210730_759_3.tif	BOX759		Intensity threshold (in SD): 25.0
9	1	383.063	497	1	1	1	381	496	385	498	3	629.75	922.75	1	0	9	0	9	20210730_759_3.tif	BOX759		Channel: 2
10	1	385.357	502.794	1	1	1	383	500	388	506	15	36395.5	20199	1	1	10	71	10	20210730_759_3.tif	BOX759		Include larger particles: false
11	1	390.541	501.259	1	1	1	389	499	392	504	7	3455.5	1580.5	1	0	11	0	11	20210730_759_3.tif	BOX759		Segment larger particles: false
12	1	391.186	527.83	1	1	1	389	526	393	530	8	5403.56	2158.06	1	0	12	0	12	20210730_759_3.tif	BOX759		Approximate particle size: 3.0
13	1	402.057	502.736	1	1	1	400	499	405	508	19	15275.6	4874.71	1	0	13	0	13	20210730_759_3.tif	BOX759		Intensity threshold (in SD): 25.0
14	1	403.225	511.477	1	1	1	401	509	406	515	14	20782.1	12147.8	1	1	14	73	14	20210730_759_3.tif	BOX759
15	1	403.288	524.56	1	1	1	401	522	406	528	14	31975	18049.9	1	1	15	74	15	20210730_759_3.tif	BOX759		Channel 1 = GFP
16	1	410.375	498.564	1	1	1	408	496	412	501	9	5752.67	2593.33	1	1	16	75	16	20210730_759_3.tif	BOX759		Channel 2= mCherry
17	1	411.524	543.97	1	1	1	410	542	413	546	6	2617.29	626.857	1	0	17	0	17	20210730_759_3.tif	BOX759
18	1	414.034	517.704	1	1	1	412	516	416	519	4	2740.43	377.857	1	0	18	0	18	20210730_759_3.tif	BOX759
19	1	415.405	527.818	1	1	1	412	525	418	531	17	60737	23865.7	1	1	19	76	19	20210730_759_3.tif	BOX759
20	1	415.236	502.915	1	1	1	414	501	417	505	4	4025.86	791.857	1	0	20	0	20	20210730_759_3.tif	BOX759
21	1	416.266	546.942	1	1	1	415	545	418	549	4	1885.43	81.1429	1	0	21	0	21	20210730_759_3.tif	BOX759
22	1	417.293	472.695	1	1	1	416	471	419	474	3	1348.67	488	1	0	22	0	22	20210730_759_3.tif	BOX759
23	1	419.426	504.349	1	1	1	417	502	422	507	10	10098	4262.4	1	0	23	0	23	20210730_759_3.tif	BOX759
24	1	422.308	515.878	1	1	1	419	513	425	519	18	114276	48862.9	1	1	24	77	24	20210730_759_3.tif	BOX759
25	1	429.5	541.503	1	1	1	428	540	431	543	4	1472.33	-418	1	0	25	0	25	20210730_759_3.tif	BOX759
26	1	432.406	507.656	1	1	1	430	505	435	510	13	7971.8	3914.4	1	0	26	0	26	20210730_759_3.tif	BOX759
27	1	434.782	495.97	1	1	1	432	493	437	499	13	25638.6	9411.09	1	1	27	78	27	20210730_759_3.tif	BOX759
28	1	434.346	530.751	1	1	1	432	528	437	534	14	21739.8	8033.36	1	1	28	79	28	20210730_759_3.tif	BOX759
29	1	436.297	550.304	1	1	1	434	548	439	553	10	8544.6	1620.4	1	0	29	0	29	20210730_759_3.tif	BOX759
30	1	437.969	537.091	1	1	1	436	535	440	540	10	10189.3	2867	1	0	30	0	30	20210730_759_3.tif	BOX759
31	1	440.889	500.062	1	1	1	438	495	443	505	21	26623.6	9360	1	1	31	80	31	20210730_759_3.tif	BOX759
32	1	441.443	511.467	1	1	1	439	509	444	514	12	21302.6	7089.2	1	1	32	81	32	20210730_759_3.tif	BOX759
33	1	448.373	500.79	1	1	1	447	499	450	503	5	1712	837.429	1	0	33	0	33	20210730_759_3.tif	BOX759
34	1	449.179	518.787	1	1	1	447	517	451	521	6	3356.94	1556.19	1	0	34	0	34	20210730_759_3.tif	BOX759
35	1	453.858	488.868	1	1	1	452	487	456	491	8	2963.62	1021.06	1	0	35	0	35	20210730_759_3.tif	BOX759
36	1	461.039	510.024	1	1	1	459	507	463	513	11	12188	5356.75	1	1	36	82	36	20210730_759_3.tif	BOX759
37	1	465.471	496.537	1	1	1	463	494	468	499	12	21083.2	5385.8	1	1	37	83	37	20210730_759_3.tif	BOX759
38	1	465.432	533.285	1	1	1	464	531	467	536	7	3127.5	1380	1	0	38	0	38	20210730_759_3.tif	BOX759
39	1	470.341	499.69	1	1	1	468	497	473	502	13	19307.2	4663.6	1	1	39	84	39	20210730_759_3.tif	BOX759
40	1	475.98	530.511	1	1	1	474	528	478	533	8	5916.33	1222.33	1	0	40	0	40	20210730_759_3.tif	BOX759
41	1	477.47	514.02	1	1	1	476	512	479	516	6	3414.57	655.429	1	0	41	0	41	20210730_759_3.tif	BOX759
42	1	481.468	526.432	1	1	1	480	524	483	529	6	2474	-242.5	1	0	42	0	42	20210730_759_3.tif	BOX759
43	1	482.338	520.3	1	1	1	481	519	484	522	3	647.333	1263.33	1	0	43	0	43	20210730_759_3.tif	BOX759
44	1	484.648	511.397	1	1	1	483	509	487	514	9	6359.67	3456	1	0	44	0	44	20210730_759_3.tif	BOX759
45	1	486.073	500.428	1	1	1	484	499	488	502	6	1933.14	968	1	0	45	0	45	20210730_759_3.tif	BOX759
46	1	488.664	522.756	1	1	1	486	520	491	526	14	25999.3	9411.64	1	1	46	85	46	20210730_759_3.tif	BOX759
47	1	489.318	530.657	1	1	1	487	528	492	534	16	30463.3	17556.5	1	1	47	86	47	20210730_759_3.tif	BOX759
48	1	489.335	559.324	1	1	1	488	558	491	561	3	1352.67	-53.3333	1	0	48	0	48	20210730_759_3.tif	BOX759
49	1	492.967	507.635	1	1	1	490	505	495	510	12	14459.8	2835	1	0	49	0	49	20210730_759_3.tif	BOX759
50	1	503.12	515.868	1	1	1	499	514	506	518	11	8190.27	1158.45	1	0	50	0	50	20210730_759_3.tif	BOX759
51	1	508.904	509.173	1	1	1	507	507	511	511	6	3517.62	2674.81	1	1	51	87	51	20210730_759_3.tif	BOX759
52	1	513.277	508.315	1	1	1	511	506	516	511	10	10933.6	5058.2	1	1	52	89	52	20210730_759_3.tif	BOX759
53	1	513.621	523.47	1	1	1	511	517	516	528	24	86509	41577.5	1	1	53	88	53	20210730_759_3.tif	BOX759
54	1	515.676	512.743	1	1	1	514	511	517	515	5	2777	495.571	1	0	54	0	54	20210730_759_3.tif	BOX759
55	1	520.435	524.033	1	1	1	518	521	523	527	16	72122.5	35774.6	1	1	55	91	55	20210730_759_3.tif	BOX759
56	1	520.694	532.354	1	1	1	519	531	522	534	3	878.667	16	1	0	56	0	56	20210730_759_3.tif	BOX759
57	1	522.985	516.475	1	1	1	521	514	525	519	8	6738	2500	1	0	57	0	57	20210730_759_3.tif	BOX759
58	1	526.643	509.431	1	1	1	525	507	528	512	6	3783	1650	1	0	58	0	58	20210730_759_3.tif	BOX759
59	1	529.238	520.594	1	1	1	526	518	533	523	18	41422	19193	1	1	59	92	59	20210730_759_3.tif	BOX759
60	1	531.652	553.646	1	1	1	530	552	533	555	3	1167.33	-307.333	1	0	60	0	60	20210730_759_3.tif	BOX759
61	1	534.545	528.529	1	1	1	532	526	537	531	12	10220.8	3422.2	1	0	61	0	61	20210730_759_3.tif	BOX759
62	1	533.481	539.536	1	1	1	532	538	535	541	4	239.333	807.333	1	0	62	0	62	20210730_759_3.tif	BOX759
63	1	534.578	508.771	1	1	1	533	506	536	511	7	3575	629.5	1	0	63	0	63	20210730_759_3.tif	BOX759
64	1	541.109	537.865	1	1	1	538	536	544	540	14	11599.5	3518	1	0	64	0	64	20210730_759_3.tif	BOX759
65	1	551.496	566.474	1	1	1	550	565	553	568	4	1500.67	831	1	0	65	0	65	20210730_759_3.tif	BOX759
66	1	571	524.431	1	1	1	570	522	572	527	4	863.571	492.714	1	0	66	0	66	20210730_759_3.tif	BOX759
67	1	576.773	541.156	1	1	1	575	539	579	543	6	3091	320.5	1	0	67	0	67	20210730_759_3.tif	BOX759
68	2	367.485	510.145	2	1	1	365	506	371	514	16	36946.5	21286	1	1	6	68	68	20210730_759_3.tif	BOX759
69	2	369.291	501.446	2	1	1	367	498	372	506	11	31488.7	15133.3	1	1	7	69	69	20210730_759_3.tif	BOX759
70	2	377.229	512.554	2	1	1	375	510	380	515	5	8179.2	5705.2	1	1	8	70	70	20210730_759_3.tif	BOX759
71	2	385.285	503.03	2	1	1	383	500	388	506	13	36395.5	20199	1	1	10	71	71	20210730_759_3.tif	BOX759
72	2	392	489.972	2	1	1	391	488	393	492	3	-207.75	276.5	0	1	0	72	72	20210730_759_3.tif	BOX759
73	2	402.998	511.929	2	1	1	401	509	406	515	11	20782.1	12147.8	1	1	14	73	73	20210730_759_3.tif	BOX759
74	2	403.367	524.768	2	1	1	401	522	406	528	14	31975	18049.9	1	1	15	74	74	20210730_759_3.tif	BOX759
75	2	410.478	499.488	2	1	1	408	496	412	501	4	5752.67	2593.33	1	1	16	75	75	20210730_759_3.tif	BOX759
76	2	415.591	528.27	2	1	1	412	525	418	531	13	60737	23865.7	1	1	19	76	76	20210730_759_3.tif	BOX759
77	2	422.343	515.894	2	1	1	419	513	425	519	17	114276	48862.9	1	1	24	77	77	20210730_759_3.tif	BOX759
78	2	434.874	496.323	2	1	1	432	493	437	499	9	25638.6	9411.09	1	1	27	78	78	20210730_759_3.tif	BOX759
79	2	434.489	531.019	2	1	1	432	528	437	534	6	21739.8	8033.36	1	1	28	79	79	20210730_759_3.tif	BOX759
80	2	441.375	498.786	2	1	1	438	495	443	505	5	26623.6	9360	1	1	31	80	80	20210730_759_3.tif	BOX759
81	2	441.469	512.011	2	1	1	439	509	444	514	6	21302.6	7089.2	1	1	32	81	81	20210730_759_3.tif	BOX759
82	2	461.115	510.406	2	1	1	459	507	463	513	7	12188	5356.75	1	1	36	82	82	20210730_759_3.tif	BOX759
83	2	465.242	496.991	2	1	1	463	494	468	499	4	21083.2	5385.8	1	1	37	83	83	20210730_759_3.tif	BOX759
84	2	470.479	500.444	2	1	1	468	497	473	502	4	19307.2	4663.6	1	1	39	84	84	20210730_759_3.tif	BOX759
85	2	488.635	523.353	2	1	1	486	520	491	526	9	25999.3	9411.64	1	1	46	85	85	20210730_759_3.tif	BOX759
86	2	489.015	530.783	2	1	1	487	528	492	534	10	30463.3	17556.5	1	1	47	86	86	20210730_759_3.tif	BOX759
87	2	508.278	509.289	2	1	1	507	507	511	511	3	3517.62	2674.81	1	1	51	87	87	20210730_759_3.tif	BOX759
88	2	513.532	524.873	2	1	1	511	517	516	528	16	86509	41577.5	1	1	53	88	88	20210730_759_3.tif	BOX759
89	2	513.445	508.512	2	1	1	511	506	516	511	4	10933.6	5058.2	1	1	52	89	89	20210730_759_3.tif	BOX759
90	2	514.086	520.041	2	1	1	512	518	516	522	5	13478.6	5453.5	0	1	0	90	90	20210730_759_3.tif	BOX759
91	2	520.451	524.163	2	1	1	518	521	523	527	15	72122.5	35774.6	1	1	55	91	91	20210730_759_3.tif	BOX759
92	2	529.073	520.879	2	1	1	526	518	533	523	14	41422	19193	1	1	59	92	92	20210730_759_3.tif	BOX759
93	2	539.67	513.641	2	1	1	538	512	541	515	3	2788.67	1600	0	1	0	93	93	20210730_759_3.tif	BOX759
94	2	543.902	523.837	2	1	1	541	522	547	525	6	8868.22	3621.11	0	1	0	94	94	20210730_759_3.tif	BOX759
95	2	557.668	520.664	2	1	1	555	518	560	523	13	-1011.8	11976.4	0	1	0	95	95	20210730_759_3.tif	BOX759
96	2	557.615	556.792	2	1	1	556	555	559	559	5	-197.143	2356.43	0	1	0	96	96	20210730_759_3.tif	BOX759
97	2	561.624	519.743	2	1	1	560	518	563	521	3	-149.667	2053.67	0	1	0	97	97	20210730_759_3.tif	BOX759
98	2	585.767	523.297	2	1	1	583	521	588	525	8	-3	6373	0	1	0	98	98	20210730_759_3.tif	BOX759
1	1	208.467	861.897	1	1	1	207	860	210	864	6	2802	368.571	1	0	1	0	1	MAX_20210209_lariat_box484_ex259a_4_w2SpinningDisc - Red.tif	BOX759
2	1	208.303	929.338	1	1	1	207	928	210	931	3	1022.67	452.333	1	0	2	0	2	MAX_20210209_lariat_box484_ex259a_4_w2SpinningDisc - Red.tif	BOX759
3	1	208.691	958.092	1	1	1	207	956	210	961	6	3112	502.5	1	0	3	0	3	MAX_20210209_lariat_box484_ex259a_4_w2SpinningDisc - Red.tif	BOX759
4	1	210.665	874.899	1	1	1	209	872	213	878	12	10813.2	1820	1	0	4	0	4	MAX_20210209_lariat_box484_ex259a_4_w2SpinningDisc - Red.tif	BOX759
5	1	210.366	903.184	1	1	1	209	901	212	905	5	1920.43	252.857	1	0	5	0	5	MAX_20210209_lariat_box484_ex259a_4_w2SpinningDisc - Red.tif	BOX759
6	1	212.3	912.293	1	1	1	211	911	214	914	3	1344	150	1	0	6	0	6	MAX_20210209_lariat_box484_ex259a_4_w2SpinningDisc - Red.tif	BOX759
7	1	213.383	919.851	1	1	1	211	917	216	923	13	13731.9	4624	1	1	7	1176	7	MAX_20210209_lariat_box484_ex259a_4_w2SpinningDisc - Red.tif	BOX759
8	1	214.999	810.756	1	1	1	213	808	217	814	9	5957.75	1368.25	1	0	8	0	8	MAX_20210209_lariat_box484_ex259a_4_w2SpinningDisc - Red.tif	BOX759
9	1	216.147	869.844	1	1	1	214	867	218	873	8	5689.75	1897.75	1	0	9	0	9	MAX_20210209_lariat_box484_ex259a_4_w2SpinningDisc - Red.tif	BOX759
10	1	216.491	829.007	1	1	1	215	827	218	831	6	2769.14	1356.14	1	0	10	0	10	MAX_20210209_lariat_box484_ex259a_4_w2SpinningDisc - Red.tif	BOX759
11	1	216.447	846.507	1	1	1	215	845	218	848	4	1636.33	178	1	0	11	0	11	MAX_20210209_lariat_box484_ex259a_4_w2SpinningDisc - Red.tif	BOX759
12	1	218.28	786.593	1	1	1	216	783	220	790	13	7527.91	2821.91	1	0	12	0	12	MAX_20210209_lariat_box484_ex259a_4_w2SpinningDisc - Red.tif	BOX759
13	1	218.112	900.823	1	1	1	216	898	220	904	10	6785.5	1746	1	0	13	0	13	MAX_20210209_lariat_box484_ex259a_4_w2SpinningDisc - Red.tif	BOX759
14	1	217.691	933.747	1	1	1	216	932	220	936	7	4312.62	829.812	1	0	14	0	14	MAX_20210209_lariat_box484_ex259a_4_w2SpinningDisc - Red.tif	BOX759
15	1	218.52	989.358	1	1	1	216	987	221	992	10	7325	4080.2	1	1	15	1178	15	MAX_20210209_lariat_box484_ex259a_4_w2SpinningDisc - Red.tif	BOX759
16	1	219.395	889.53	1	1	1	217	887	222	893	15	24353	9059	1	1	16	1177	16	MAX_20210209_lariat_box484_ex259a_4_w2SpinningDisc - Red.tif	BOX759
17	1	219.954	927.821	1	1	1	218	923	222	932	18	12708.5	3855.08	1	0	17	0	17	MAX_20210209_lariat_box484_ex259a_4_w2SpinningDisc - Red.tif	BOX759
18	1	221.37	862.933	1	1	1	219	860	224	866	15	14002.2	3752.09	1	0	18	0	18	MAX_20210209_lariat_box484_ex259a_4_w2SpinningDisc - Red.tif	BOX759
19	1	222.778	945.245	1	1	1	220	940	226	949	22	43425	14283.3	1	1	19	1179	19	MAX_20210209_lariat_box484_ex259a_4_w2SpinningDisc - Red.tif	BOX759
20	1	221.732	966.394	1	1	1	220	963	224	970	13	9743.55	5701.45	1	1	20	1180	20	MAX_20210209_lariat_box484_ex259a_4_w2SpinningDisc - Red.tif	BOX759
21	1	222.759	756.097	1	1	1	221	754	225	759	10	9905.33	2992.67	1	0	21	0	21	MAX_20210209_lariat_box484_ex259a_4_w2SpinningDisc - Red.tif	BOX759
22	1	223.637	979.562	1	1	1	221	977	226	983	12	12205.7	3302	1	0	22	0	22	MAX_20210209_lariat_box484_ex259a_4_w2SpinningDisc - Red.tif	BOX759
23	1	225.248	751.025	1	1	1	223	749	227	753	7	4248.19	2617.06	1	1	23	1181	23	MAX_20210209_lariat_box484_ex259a_4_w2SpinningDisc - Red.tif	BOX759
24	1	225.255	829.285	1	1	1	223	824	227	833	15	13092.8	5730.77	1	1	24	1182	24	MAX_20210209_lariat_box484_ex259a_4_w2SpinningDisc - Red.tif	BOX759
25	1	225.145	992.496	1	1	1	223	990	227	996	12	12836.8	3306.25	1	0	25	0	25	MAX_20210209_lariat_box484_ex259a_4_w2SpinningDisc - Red.tif	BOX759
26	1	225.662	726.211	1	1	1	224	724	228	729	8	4345	1411.67	1	0	26	0	26	MAX_20210209_lariat_box484_ex259a_4_w2SpinningDisc - Red.tif	BOX759
27	1	226.65	903.678	1	1	1	224	901	229	907	13	20194.6	8582.55	1	1	27	1183	27	MAX_20210209_lariat_box484_ex259a_4_w2SpinningDisc - Red.tif	BOX759
28	1	228.419	713.247	1	1	1	226	709	231	717	16	20145.2	8628.15	1	1	28	1184	28	MAX_20210209_lariat_box484_ex259a_4_w2SpinningDisc - Red.tif	BOX759
29	1	227.666	792.687	1	1	1	226	791	229	794	3	1596	-54	1	0	29	0	29	MAX_20210209_lariat_box484_ex259a_4_w2SpinningDisc - Red.tif	BOX759
30	1	228.079	815.968	1	1	1	226	813	230	819	11	9276.75	3426.5	1	1	30	1186	30	MAX_20210209_lariat_box484_ex259a_4_w2SpinningDisc - Red.tif	BOX759
31	1	227.63	886.486	1	1	1	226	884	230	889	9	6146.67	683	1	0	31	0	31	MAX_20210209_lariat_box484_ex259a_4_w2SpinningDisc - Red.tif	BOX759
32	1	229.738	700.278	1	1	1	227	698	232	703	12	13507.4	5373.8	1	1	32	1187	32	MAX_20210209_lariat_box484_ex259a_4_w2SpinningDisc - Red.tif	BOX759
33	1	229.49	808.408	1	1	1	227	806	232	812	12	41885.1	13946.4	1	1	33	1185	33	MAX_20210209_lariat_box484_ex259a_4_w2SpinningDisc - Red.tif	BOX759
34	1	228.982	879.481	1	1	1	227	877	231	882	8	5057.33	450.333	1	0	34	0	34	MAX_20210209_lariat_box484_ex259a_4_w2SpinningDisc - Red.tif	BOX759
35	1	230.235	686.988	1	1	1	228	684	233	690	12	13651.9	4739.18	1	1	35	1188	35	MAX_20210209_lariat_box484_ex259a_4_w2SpinningDisc - Red.tif	BOX759
36	1	229	965.516	1	1	1	228	963	230	968	4	1838.14	161.143	1	0	36	0	36	MAX_20210209_lariat_box484_ex259a_4_w2SpinningDisc - Red.tif	BOX759
37	1	231.316	764.328	1	1	1	230	763	233	766	3	1772.67	353	1	0	37	0	37	MAX_20210209_lariat_box484_ex259a_4_w2SpinningDisc - Red.tif	BOX759
38	1	232.049	784.77	1	1	1	230	782	234	788	12	14193	5275	1	1	38	1189	38	MAX_20210209_lariat_box484_ex259a_4_w2SpinningDisc - Red.tif	BOX759
39	1	231.797	863.95	1	1	1	230	862	233	866	4	1909.29	1072.43	1	0	39	0	39	MAX_20210209_lariat_box484_ex259a_4_w2SpinningDisc - Red.tif	BOX759
40	1	233.556	759.638	1	1	1	231	757	236	763	13	20135.4	6391.18	1	1	40	1192	40	MAX_20210209_lariat_box484_ex259a_4_w2SpinningDisc - Red.tif	BOX759
41	1	233.122	769.26	1	1	1	231	767	235	772	9	4832.67	855.333	1	0	41	0	41	MAX_20210209_lariat_box484_ex259a_4_w2SpinningDisc - Red.tif	BOX759
42	1	232	825.983	1	1	1	231	824	233	828	3	1204.5	255.5	1	0	42	0	42	MAX_20210209_lariat_box484_ex259a_4_w2SpinningDisc - Red.tif	BOX759
43	1	233.277	854.893	1	1	1	231	852	236	859	15	39317	18349	1	1	43	1190	43	MAX_20210209_lariat_box484_ex259a_4_w2SpinningDisc - Red.tif	BOX759
44	1	232.714	896.167	1	1	1	231	894	235	899	8	6620.33	1584	1	0	44	0	44	MAX_20210209_lariat_box484_ex259a_4_w2SpinningDisc - Red.tif	BOX759
45	1	232.588	904.677	1	1	1	231	902	235	908	10	9749	5062	1	1	45	1191	45	MAX_20210209_lariat_box484_ex259a_4_w2SpinningDisc - Red.tif	BOX759
46	1	233.813	734.975	1	1	1	232	733	235	737	4	2109.29	204.286	1	0	46	0	46	MAX_20210209_lariat_box484_ex259a_4_w2SpinningDisc - Red.tif	BOX759
47	1	234.851	744.946	1	1	1	232	742	237	748	12	15664.1	3745.09	1	1	47	1193	47	MAX_20210209_lariat_box484_ex259a_4_w2SpinningDisc - Red.tif	BOX759
48	1	234.647	671.701	1	1	1	233	670	236	673	3	795.333	249	1	0	48	0	48	MAX_20210209_lariat_box484_ex259a_4_w2SpinningDisc - Red.tif	BOX759
49	1	234	720.976	1	1	1	233	719	235	723	3	1525.5	93.5	1	0	49	0	49	MAX_20210209_lariat_box484_ex259a_4_w2SpinningDisc - Red.tif	BOX759
50	1	235.229	752.981	1	1	1	234	751	237	755	4	1678.43	649.286	1	0	50	0	50	MAX_20210209_lariat_box484_ex259a_4_w2SpinningDisc - Red.tif	BOX759
51	1	235	884.019	1	1	1	234	882	236	886	3	496.25	-59.75	1	0	51	0	51	MAX_20210209_lariat_box484_ex259a_4_w2SpinningDisc - Red.tif	BOX759
52	1	235.515	913.984	1	1	1	234	912	237	916	6	2378.29	477.143	1	0	52	0	52	MAX_20210209_lariat_box484_ex259a_4_w2SpinningDisc - Red.tif	BOX759
53	1	236.004	920.215	1	1	1	234	917	238	924	12	7740.55	2212.64	1	0	53	0	53	MAX_20210209_lariat_box484_ex259a_4_w2SpinningDisc - Red.tif	BOX759
54	1	235.419	980.714	1	1	1	234	978	237	983	7	4192.5	-74	1	0	54	0	54	MAX_20210209_lariat_box484_ex259a_4_w2SpinningDisc - Red.tif	BOX759
55	1	237.214	775.231	1	1	1	235	773	240	778	12	13370.2	2158	1	0	55	0	55	MAX_20210209_lariat_box484_ex259a_4_w2SpinningDisc - Red.tif	BOX759
56	1	237.373	828.266	1	1	1	235	826	239	831	9	7068.33	1763	1	0	56	0	56	MAX_20210209_lariat_box484_ex259a_4_w2SpinningDisc - Red.tif	BOX759
57	1	237.565	661.464	1	1	1	236	660	239	663	4	1898.67	-134.333	1	0	57	0	57	MAX_20210209_lariat_box484_ex259a_4_w2SpinningDisc - Red.tif	BOX759
58	1	238.78	838.016	1	1	1	236	835	241	841	13	10344.1	3558.55	1	0	58	0	58	MAX_20210209_lariat_box484_ex259a_4_w2SpinningDisc - Red.tif	BOX759
59	1	238.91	796.765	1	1	1	237	794	241	800	12	12680.2	2300.5	1	0	59	0	59	MAX_20210209_lariat_box484_ex259a_4_w2SpinningDisc - Red.tif	BOX759
60	1	239.97	760.198	1	1	1	238	758	242	763	6	5339.67	677.333	1	0	60	0	60	MAX_20210209_lariat_box484_ex259a_4_w2SpinningDisc - Red.tif	BOX759
61	1	240.176	786.023	1	1	1	238	783	242	789	11	6411	697.5	1	0	61	0	61	MAX_20210209_lariat_box484_ex259a_4_w2SpinningDisc - Red.tif	BOX759
62	1	239	952.444	1	1	1	238	950	240	955	4	1273.43	297.857	1	0	62	0	62	MAX_20210209_lariat_box484_ex259a_4_w2SpinningDisc - Red.tif	BOX759
63	1	240.24	969.232	1	1	1	238	964	243	974	19	19105.2	9879.4	1	1	63	1194	63	MAX_20210209_lariat_box484_ex259a_4_w2SpinningDisc - Red.tif	BOX759
64	1	241.712	884.13	1	1	1	240	882	244	887	8	4787	663.333	1	0	64	0	64	MAX_20210209_lariat_box484_ex259a_4_w2SpinningDisc - Red.tif	BOX759
65	1	243.307	727.818	1	1	1	241	725	245	731	12	10255	2169	1	0	65	0	65	MAX_20210209_lariat_box484_ex259a_4_w2SpinningDisc - Red.tif	BOX759
66	1	244.075	617.046	1	1	1	242	615	246	620	9	7381	4080.33	1	1	66	1195	66	MAX_20210209_lariat_box484_ex259a_4_w2SpinningDisc - Red.tif	BOX759
67	1	244.02	690.988	1	1	1	242	688	246	694	11	9865.5	3469.75	1	1	67	1196	67	MAX_20210209_lariat_box484_ex259a_4_w2SpinningDisc - Red.tif	BOX759
68	1	244.036	870.819	1	1	1	242	868	246	875	14	22376	5782	1	1	68	1197	68	MAX_20210209_lariat_box484_ex259a_4_w2SpinningDisc - Red.tif	BOX759
69	1	244.374	918.171	1	1	1	242	915	246	921	10	8444.5	1915.75	1	0	69	0	69	MAX_20210209_lariat_box484_ex259a_4_w2SpinningDisc - Red.tif	BOX759
70	1	244.705	742.433	1	1	1	243	740	246	745	6	3129.5	844.5	1	0	70	0	70	MAX_20210209_lariat_box484_ex259a_4_w2SpinningDisc - Red.tif	BOX759
71	1	244.511	753.948	1	1	1	243	752	246	756	6	2637.71	291.286	1	0	71	0	71	MAX_20210209_lariat_box484_ex259a_4_w2SpinningDisc - Red.tif	BOX759
72	1	247.487	631.072	1	1	1	244	629	252	634	16	19879.8	4194	1	1	72	1199	72	MAX_20210209_lariat_box484_ex259a_4_w2SpinningDisc - Red.tif	BOX759
73	1	245.397	818.8	1	1	1	244	816	247	822	9	5694.89	1543.11	1	0	73	0	73	MAX_20210209_lariat_box484_ex259a_4_w2SpinningDisc - Red.tif	BOX759
74	1	245.689	856.804	1	1	1	244	854	248	860	12	13928	3801.75	1	1	74	1198	74	MAX_20210209_lariat_box484_ex259a_4_w2SpinningDisc - Red.tif	BOX759
75	1	246.907	622.099	1	1	1	245	620	249	625	10	8582.67	2500.67	1	0	75	0	75	MAX_20210209_lariat_box484_ex259a_4_w2SpinningDisc - Red.tif	BOX759
76	1	247.365	784.024	1	1	1	245	780	249	788	14	11064.1	6150.5	1	1	76	1200	76	MAX_20210209_lariat_box484_ex259a_4_w2SpinningDisc - Red.tif	BOX759
77	1	247.121	803.105	1	1	1	245	800	249	806	12	10676	3252.75	1	0	77	0	77	MAX_20210209_lariat_box484_ex259a_4_w2SpinningDisc - Red.tif	BOX759
78	1	246.419	901.197	1	1	1	245	899	248	904	7	4587.5	1390	1	0	78	0	78	MAX_20210209_lariat_box484_ex259a_4_w2SpinningDisc - Red.tif	BOX759
79	1	249.378	701.137	1	1	1	247	698	252	704	14	15433.1	6468.36	1	1	79	1201	79	MAX_20210209_lariat_box484_ex259a_4_w2SpinningDisc - Red.tif	BOX759
80	1	250.107	680.102	1	1	1	248	677	252	683	11	11127.5	1800.5	1	0	80	0	80	MAX_20210209_lariat_box484_ex259a_4_w2SpinningDisc - Red.tif	BOX759
81	1	250.285	842.235	1	1	1	248	840	252	845	10	6761.67	2816	1	0	81	0	81	MAX_20210209_lariat_box484_ex259a_4_w2SpinningDisc - Red.tif	BOX759
82	1	249.813	865.61	1	1	1	248	863	252	868	9	6409	3272.67	1	0	82	0	82	MAX_20210209_lariat_box484_ex259a_4_w2SpinningDisc - Red.tif	BOX759
83	1	249.686	945.5	1	1	1	248	943	252	949	10	9416.5	4317.25	1	1	83	1202	83	MAX_20210209_lariat_box484_ex259a_4_w2SpinningDisc - Red.tif	BOX759
84	1	250.484	989.102	1	1	1	248	986	253	993	16	25768	7839	1	1	84	1203	84	MAX_20210209_lariat_box484_ex259a_4_w2SpinningDisc - Red.tif	BOX759
85	1	251.051	637.144	1	1	1	249	635	253	640	10	8389.67	1639	1	0	85	0	85	MAX_20210209_lariat_box484_ex259a_4_w2SpinningDisc - Red.tif	BOX759
86	1	250.618	735.363	1	1	1	249	733	253	738	9	7285.33	791.667	1	0	86	0	86	MAX_20210209_lariat_box484_ex259a_4_w2SpinningDisc - Red.tif	BOX759
87	1	251.555	768.545	1	1	1	249	766	254	772	13	24975.2	8391.36	1	1	87	1204	87	MAX_20210209_lariat_box484_ex259a_4_w2SpinningDisc - Red.tif	BOX759
88	1	251.789	859.683	1	1	1	250	857	254	863	11	10174.5	4331	1	1	88	1206	88	MAX_20210209_lariat_box484_ex259a_4_w2SpinningDisc - Red.tif	BOX759
89	1	253.979	592.888	1	1	1	251	590	257	596	14	14589.5	3707	1	1	89	1208	89	MAX_20210209_lariat_box484_ex259a_4_w2SpinningDisc - Red.tif	BOX759
90	1	253.395	602.79	1	1	1	251	600	256	607	15	60315	25951	1	1	90	1205	90	MAX_20210209_lariat_box484_ex259a_4_w2SpinningDisc - Red.tif	BOX759
91	1	253.962	685.599	1	1	1	251	683	257	689	17	34510.8	14395.3	1	1	91	1207	91	MAX_20210209_lariat_box484_ex259a_4_w2SpinningDisc - Red.tif	BOX759
92	1	253.208	713.562	1	1	1	251	711	255	716	10	11766.7	1885.67	1	0	92	0	92	MAX_20210209_lariat_box484_ex259a_4_w2SpinningDisc - Red.tif	BOX759
93	1	254.171	848.411	1	1	1	252	846	256	851	9	8108.33	1173	1	0	93	0	93	MAX_20210209_lariat_box484_ex259a_4_w2SpinningDisc - Red.tif	BOX759
94	1	253.694	972.183	1	1	1	252	970	255	975	6	3060	935	1	0	94	0	94	MAX_20210209_lariat_box484_ex259a_4_w2SpinningDisc - Red.tif	BOX759
95	1	255.186	615.783	1	1	1	253	613	257	619	10	10092	2499.25	1	0	95	0	95	MAX_20210209_lariat_box484_ex259a_4_w2SpinningDisc - Red.tif	BOX759
96	1	256.122	640.847	1	1	1	253	638	259	645	15	31365.8	13798.2	1	1	96	1209	96	MAX_20210209_lariat_box484_ex259a_4_w2SpinningDisc - Red.tif	BOX759
97	1	254.893	745.642	1	1	1	253	743	257	749	11	11766	2620	1	0	97	0	97	MAX_20210209_lariat_box484_ex259a_4_w2SpinningDisc - Red.tif	BOX759
98	1	254.554	959.438	1	1	1	253	957	256	962	8	4124	-49	1	0	98	0	98	MAX_20210209_lariat_box484_ex259a_4_w2SpinningDisc - Red.tif	BOX759
99	1	255.98	718.65	1	1	1	254	716	258	722	9	10572.5	3454.75	1	0	99	0	99	MAX_20210209_lariat_box484_ex259a_4_w2SpinningDisc - Red.tif	BOX759
100	1	256.309	740.131	1	1	1	254	737	259	743	14	24375.5	12682.3	1	1	100	1210	100	MAX_20210209_lariat_box484_ex259a_4_w2SpinningDisc - Red.tif	BOX759
101	1	255.688	866.585	1	1	1	254	865	257	868	3	2136	-61.6667	1	0	101	0	101	MAX_20210209_lariat_box484_ex259a_4_w2SpinningDisc - Red.tif	BOX759
102	1	255.315	931.594	1	1	1	254	930	257	933	3	791.667	133.667	1	0	102	0	102	MAX_20210209_lariat_box484_ex259a_4_w2SpinningDisc - Red.tif	BOX759
103	1	257.338	804.573	1	1	1	255	802	260	808	12	11529.2	3329.27	1	0	103	0	103	MAX_20210209_lariat_box484_ex259a_4_w2SpinningDisc - Red.tif	BOX759
104	1	256.337	824.163	1	1	1	255	822	258	826	5	2833.43	616.286	1	0	104	0	104	MAX_20210209_lariat_box484_ex259a_4_w2SpinningDisc - Red.tif	BOX759
105	1	258.193	574.871	1	1	1	256	572	260	578	10	9710.25	2086.25	1	0	105	0	105	MAX_20210209_lariat_box484_ex259a_4_w2SpinningDisc - Red.tif	BOX759
106	1	257.958	814.39	1	1	1	256	812	260	818	11	9566.25	1842.5	1	0	106	0	106	MAX_20210209_lariat_box484_ex259a_4_w2SpinningDisc - Red.tif	BOX759
107	1	258.778	851.012	1	1	1	256	849	261	854	11	15522.2	5213.2	1	1	107	1211	107	MAX_20210209_lariat_box484_ex259a_4_w2SpinningDisc - Red.tif	BOX759
108	1	259.392	890.787	1	1	1	256	888	262	893	14	14146.2	3248.36	1	0	108	0	108	MAX_20210209_lariat_box484_ex259a_4_w2SpinningDisc - Red.tif	BOX759
109	1	258.147	590.054	1	1	1	257	588	260	592	4	3338	944.857	1	0	109	0	109	MAX_20210209_lariat_box484_ex259a_4_w2SpinningDisc - Red.tif	BOX759
110	1	259.554	672.572	1	1	1	257	670	262	676	12	16125.6	8100	1	1	110	1213	110	MAX_20210209_lariat_box484_ex259a_4_w2SpinningDisc - Red.tif	BOX759
111	1	259.259	871.396	1	1	1	257	869	261	874	10	10616	2240.33	1	0	111	0	111	MAX_20210209_lariat_box484_ex259a_4_w2SpinningDisc - Red.tif	BOX759
112	1	258.4	915.603	1	1	1	257	913	260	918	7	3229	382.5	1	0	112	0	112	MAX_20210209_lariat_box484_ex259a_4_w2SpinningDisc - Red.tif	BOX759
113	1	260.001	611.879	1	1	1	258	609	262	615	11	21291.2	6284	1	1	113	1212	113	MAX_20210209_lariat_box484_ex259a_4_w2SpinningDisc - Red.tif	BOX759
114	1	259.635	655.16	1	1	1	258	653	261	658	7	4507.5	998.5	1	0	114	0	114	MAX_20210209_lariat_box484_ex259a_4_w2SpinningDisc - Red.tif	BOX759
115	1	260.201	788.707	1	1	1	258	785	262	793	15	22377.8	7163.62	1	1	115	1215	115	MAX_20210209_lariat_box484_ex259a_4_w2SpinningDisc - Red.tif	BOX759
116	1	261.36	595.728	1	1	1	259	591	264	600	21	37416.3	11624.6	1	1	116	1214	116	MAX_20210209_lariat_box484_ex259a_4_w2SpinningDisc - Red.tif	BOX759
117	1	260.382	667.287	1	1	1	259	665	262	670	7	5072.5	1246.5	1	0	117	0	117	MAX_20210209_lariat_box484_ex259a_4_w2SpinningDisc - Red.tif	BOX759
118	1	260.673	728.149	1	1	1	259	726	263	731	8	9978	1662.67	1	0	118	0	118	MAX_20210209_lariat_box484_ex259a_4_w2SpinningDisc - Red.tif	BOX759
119	1	261.938	768.809	1	1	1	260	767	264	771	8	6006	1987.56	1	0	119	0	119	MAX_20210209_lariat_box484_ex259a_4_w2SpinningDisc - Red.tif	BOX759
120	1	261.607	844.755	1	1	1	260	843	263	847	5	1838.43	495.429	1	0	120	0	120	MAX_20210209_lariat_box484_ex259a_4_w2SpinningDisc - Red.tif	BOX759
121	1	261	937.402	1	1	1	260	935	262	940	4	1332.57	609	1	0	121	0	121	MAX_20210209_lariat_box484_ex259a_4_w2SpinningDisc - Red.tif	BOX759
122	1	262.843	643.278	1	1	1	261	641	265	646	9	6240	2656	1	0	122	0	122	MAX_20210209_lariat_box484_ex259a_4_w2SpinningDisc - Red.tif	BOX759
123	1	263.232	676.453	1	1	1	261	674	265	679	10	7463	1700.33	1	1	123	1216	123	MAX_20210209_lariat_box484_ex259a_4_w2SpinningDisc - Red.tif	BOX759
124	1	263.444	684.536	1	1	1	261	682	266	688	13	18967.8	7023.36	1	1	124	1217	124	MAX_20210209_lariat_box484_ex259a_4_w2SpinningDisc - Red.tif	BOX759
125	1	262.947	734.754	1	1	1	261	732	265	738	12	13427.5	3942.5	1	0	125	0	125	MAX_20210209_lariat_box484_ex259a_4_w2SpinningDisc - Red.tif	BOX759
126	1	262.641	831.291	1	1	1	261	829	265	834	9	6308	2180.33	1	0	126	0	126	MAX_20210209_lariat_box484_ex259a_4_w2SpinningDisc - Red.tif	BOX759
127	1	263.305	555.301	1	1	1	262	554	265	557	3	1542.67	350	1	0	127	0	127	MAX_20210209_lariat_box484_ex259a_4_w2SpinningDisc - Red.tif	BOX759
128	1	264.674	572.059	1	1	1	262	569	267	576	14	18031	5447	1	1	128	1218	128	MAX_20210209_lariat_box484_ex259a_4_w2SpinningDisc - Red.tif	BOX759
129	1	265.069	548.995	1	1	1	263	546	267	552	11	9961.5	869.75	1	0	129	0	129	MAX_20210209_lariat_box484_ex259a_4_w2SpinningDisc - Red.tif	BOX759
130	1	264.985	609.243	1	1	1	263	606	267	613	12	11780.8	1963.45	1	0	130	0	130	MAX_20210209_lariat_box484_ex259a_4_w2SpinningDisc - Red.tif	BOX759
131	1	264.919	726.462	1	1	1	263	724	267	729	8	6869	1229.33	1	0	131	0	131	MAX_20210209_lariat_box484_ex259a_4_w2SpinningDisc - Red.tif	BOX759
132	1	265.385	792.605	1	1	1	263	790	268	796	13	18701.5	6520.27	1	1	132	1219	132	MAX_20210209_lariat_box484_ex259a_4_w2SpinningDisc - Red.tif	BOX759
133	1	264.5	863.98	1	1	1	263	861	266	867	10	7806	311.556	1	0	133	0	133	MAX_20210209_lariat_box484_ex259a_4_w2SpinningDisc - Red.tif	BOX759
134	1	264.504	871.917	1	1	1	263	870	266	874	6	2163.71	519.429	1	0	134	0	134	MAX_20210209_lariat_box484_ex259a_4_w2SpinningDisc - Red.tif	BOX759
135	1	265.252	894.211	1	1	1	263	889	267	899	18	13788.2	4534.39	1	0	135	0	135	MAX_20210209_lariat_box484_ex259a_4_w2SpinningDisc - Red.tif	BOX759
136	1	264	970.06	1	1	1	263	968	265	972	3	536	119	1	0	136	0	136	MAX_20210209_lariat_box484_ex259a_4_w2SpinningDisc - Red.tif	BOX759
137	1	266.383	630.521	1	1	1	264	628	269	634	12	13274.1	6755.27	1	1	137	1222	137	MAX_20210209_lariat_box484_ex259a_4_w2SpinningDisc - Red.tif	BOX759
138	1	265.35	721.178	1	1	1	264	719	267	723	5	3065.57	1331.57	1	0	138	0	138	MAX_20210209_lariat_box484_ex259a_4_w2SpinningDisc - Red.tif	BOX759
139	1	266.458	764.663	1	1	1	264	762	269	767	10	8127.2	2739	1	0	139	0	139	MAX_20210209_lariat_box484_ex259a_4_w2SpinningDisc - Red.tif	BOX759
140	1	265.766	925.913	1	1	1	264	923	268	930	13	13189.2	6361.27	1	1	140	1220	140	MAX_20210209_lariat_box484_ex259a_4_w2SpinningDisc - Red.tif	BOX759
141	1	267.295	561.555	1	1	1	265	559	270	565	15	29299.4	12239.5	1	1	141	1221	141	MAX_20210209_lariat_box484_ex259a_4_w2SpinningDisc - Red.tif	BOX759
142	1	266.491	580.449	1	1	1	265	578	268	583	8	4500.5	1465.5	1	0	142	0	142	MAX_20210209_lariat_box484_ex259a_4_w2SpinningDisc - Red.tif	BOX759
143	1	266.53	653.396	1	1	1	265	651	268	656	6	3740.5	644.5	1	0	143	0	143	MAX_20210209_lariat_box484_ex259a_4_w2SpinningDisc - Red.tif	BOX759
144	1	268.205	715.211	1	1	1	265	712	271	719	15	33539.5	9861.62	1	1	144	1224	144	MAX_20210209_lariat_box484_ex259a_4_w2SpinningDisc - Red.tif	BOX759
145	1	266	906.521	1	1	1	265	904	267	909	4	972.429	332.571	1	0	145	0	145	MAX_20210209_lariat_box484_ex259a_4_w2SpinningDisc - Red.tif	BOX759
146	1	266.328	912.27	1	1	1	265	909	268	916	9	3873	2134	1	0	146	0	146	MAX_20210209_lariat_box484_ex259a_4_w2SpinningDisc - Red.tif	BOX759
147	1	268.519	539.272	1	1	1	266	537	271	543	14	23597.5	10409.7	1	1	147	1225	147	MAX_20210209_lariat_box484_ex259a_4_w2SpinningDisc - Red.tif	BOX759
148	1	267.792	592.995	1	1	1	266	591	270	596	9	7527.67	1787.67	1	0	148	0	148	MAX_20210209_lariat_box484_ex259a_4_w2SpinningDisc - Red.tif	BOX759
149	1	269.218	624.481	1	1	1	266	622	272	628	11	16044.6	13810.7	1	1	149	1223	149	MAX_20210209_lariat_box484_ex259a_4_w2SpinningDisc - Red.tif	BOX759
150	1	269.771	638.146	1	1	1	267	636	272	641	11	9501.2	3756	1	1	150	1226	150	MAX_20210209_lariat_box484_ex259a_4_w2SpinningDisc - Red.tif	BOX759
151	1	268.729	694.126	1	1	1	267	692	271	697	8	6771.67	2534	1	0	151	0	151	MAX_20210209_lariat_box484_ex259a_4_w2SpinningDisc - Red.tif	BOX759
152	1	268.947	921.462	1	1	1	267	919	271	924	8	6436.33	146	1	0	152	0	152	MAX_20210209_lariat_box484_ex259a_4_w2SpinningDisc - Red.tif	BOX759
153	1	269.291	984.774	1	1	1	267	982	272	989	15	21411	10639	1	1	153	1227	153	MAX_20210209_lariat_box484_ex259a_4_w2SpinningDisc - Red.tif	BOX759
154	1	269.549	648.925	1	1	1	268	647	271	651	6	3933.57	869.143	1	0	154	0	154	MAX_20210209_lariat_box484_ex259a_4_w2SpinningDisc - Red.tif	BOX759
155	1	269	705.923	1	1	1	268	704	270	708	3	475.75	180	1	0	155	0	155	MAX_20210209_lariat_box484_ex259a_4_w2SpinningDisc - Red.tif	BOX759
156	1	270.591	747.153	1	1	1	268	743	273	752	20	22789.3	9605.43	1	1	156	1229	156	MAX_20210209_lariat_box484_ex259a_4_w2SpinningDisc - Red.tif	BOX759
157	1	270.617	974.509	1	1	1	268	971	273	979	18	22133.8	9862.15	1	1	157	1230	157	MAX_20210209_lariat_box484_ex259a_4_w2SpinningDisc - Red.tif	BOX759
158	1	270.522	556.742	1	1	1	269	555	272	559	5	3920.86	915	1	0	158	0	158	MAX_20210209_lariat_box484_ex259a_4_w2SpinningDisc - Red.tif	BOX759
159	1	270.849	674.763	1	1	1	269	672	273	678	12	14023	5194.25	1	1	159	1228	159	MAX_20210209_lariat_box484_ex259a_4_w2SpinningDisc - Red.tif	BOX759
160	1	271.545	772.329	1	1	1	269	770	274	775	13	21258.6	7949.6	1	1	160	1231	160	MAX_20210209_lariat_box484_ex259a_4_w2SpinningDisc - Red.tif	BOX759
161	1	273.362	779.126	1	1	1	270	777	277	782	18	24002	7964	1	1	161	1234	161	MAX_20210209_lariat_box484_ex259a_4_w2SpinningDisc - Red.tif	BOX759
162	1	272.26	802.583	1	1	1	270	800	275	806	15	63198.9	27089.2	1	1	162	1232	162	MAX_20210209_lariat_box484_ex259a_4_w2SpinningDisc - Red.tif	BOX759
163	1	271.771	860.431	1	1	1	270	858	274	864	9	7066.5	2037.75	1	0	163	0	163	MAX_20210209_lariat_box484_ex259a_4_w2SpinningDisc - Red.tif	BOX759
164	1	273.456	532.432	1	1	1	271	530	276	536	12	27106.8	14902.7	1	1	164	1233	164	MAX_20210209_lariat_box484_ex259a_4_w2SpinningDisc - Red.tif	BOX759
165	1	274.033	566.882	1	1	1	271	564	277	571	13	27090.6	8958.38	1	1	165	1235	165	MAX_20210209_lariat_box484_ex259a_4_w2SpinningDisc - Red.tif	BOX759
166	1	273.331	698.674	1	1	1	271	696	276	702	12	13623.9	4119	1	1	166	1236	166	MAX_20210209_lariat_box484_ex259a_4_w2SpinningDisc - Red.tif	BOX759
167	1	274.761	581.511	1	1	1	272	579	277	585	14	22749.5	7105.36	1	1	167	1238	167	MAX_20210209_lariat_box484_ex259a_4_w2SpinningDisc - Red.tif	BOX759
168	1	274.753	601.275	1	1	1	272	599	277	605	12	11646.6	4862.55	1	1	168	1239	168	MAX_20210209_lariat_box484_ex259a_4_w2SpinningDisc - Red.tif	BOX759
169	1	274.59	787.598	1	1	1	272	785	277	791	13	15915.1	6371	1	1	169	1240	169	MAX_20210209_lariat_box484_ex259a_4_w2SpinningDisc - Red.tif	BOX759
170	1	273.978	795.78	1	1	1	272	793	276	798	10	7738	2433.33	1	0	170	0	170	MAX_20210209_lariat_box484_ex259a_4_w2SpinningDisc - Red.tif	BOX759
171	1	273.946	905.176	1	1	1	272	902	276	909	12	11248.4	5465.91	1	1	171	1237	171	MAX_20210209_lariat_box484_ex259a_4_w2SpinningDisc - Red.tif	BOX759
172	1	275.379	513.839	1	1	1	273	511	277	517	10	9854.25	1769	1	0	172	0	172	MAX_20210209_lariat_box484_ex259a_4_w2SpinningDisc - Red.tif	BOX759
173	1	275.021	723.94	1	1	1	273	722	277	726	5	3525.25	2154.44	1	0	173	0	173	MAX_20210209_lariat_box484_ex259a_4_w2SpinningDisc - Red.tif	BOX759
174	1	276.036	524.061	1	1	1	274	521	278	527	11	11511.2	4218.5	1	1	174	1242	174	MAX_20210209_lariat_box484_ex259a_4_w2SpinningDisc - Red.tif	BOX759
175	1	276.463	704.958	1	1	1	274	702	279	708	16	30839	15638.7	1	1	175	1241	175	MAX_20210209_lariat_box484_ex259a_4_w2SpinningDisc - Red.tif	BOX759
176	1	275.814	743.664	1	1	1	274	741	278	747	11	10007.5	3215	1	0	176	0	176	MAX_20210209_lariat_box484_ex259a_4_w2SpinningDisc - Red.tif	BOX759
177	1	275.847	949.827	1	1	1	274	947	278	953	10	7577.5	1389.75	1	0	177	0	177	MAX_20210209_lariat_box484_ex259a_4_w2SpinningDisc - Red.tif	BOX759
178	1	277.659	652.359	1	1	1	275	650	280	656	11	15284.9	9946.27	1	1	178	1243	178	MAX_20210209_lariat_box484_ex259a_4_w2SpinningDisc - Red.tif	BOX759
179	1	277.267	839.172	1	1	1	275	837	279	842	8	6063.67	2712.33	1	0	179	0	179	MAX_20210209_lariat_box484_ex259a_4_w2SpinningDisc - Red.tif	BOX759
180	1	278.705	550.218	1	1	1	276	548	281	554	12	16710	6571.82	1	1	180	1244	180	MAX_20210209_lariat_box484_ex259a_4_w2SpinningDisc - Red.tif	BOX759
181	1	278.457	629.832	1	1	1	276	627	281	633	14	13111.2	3289.82	1	0	181	0	181	MAX_20210209_lariat_box484_ex259a_4_w2SpinningDisc - Red.tif	BOX759
182	1	278.068	881.313	1	1	1	276	879	280	884	11	5925	2073.67	1	0	182	0	182	MAX_20210209_lariat_box484_ex259a_4_w2SpinningDisc - Red.tif	BOX759
183	1	278.534	529.467	1	1	1	277	528	280	531	4	2280.67	412.667	1	0	183	0	183	MAX_20210209_lariat_box484_ex259a_4_w2SpinningDisc - Red.tif	BOX759
184	1	279.673	589.266	1	1	1	277	587	282	592	10	7557	26.4	1	0	184	0	184	MAX_20210209_lariat_box484_ex259a_4_w2SpinningDisc - Red.tif	BOX759
185	1	278.862	668.818	1	1	1	277	666	281	673	12	13828	5165.45	1	1	185	1246	185	MAX_20210209_lariat_box484_ex259a_4_w2SpinningDisc - Red.tif	BOX759
186	1	278.678	685.522	1	1	1	277	683	280	688	6	4375.5	1206	1	0	186	0	186	MAX_20210209_lariat_box484_ex259a_4_w2SpinningDisc - Red.tif	BOX759
187	1	279.652	890.244	1	1	1	277	885	282	896	24	39491	16682.5	1	1	187	1247	187	MAX_20210209_lariat_box484_ex259a_4_w2SpinningDisc - Red.tif	BOX759
188	1	280.067	595.101	1	1	1	278	592	282	599	12	16442.3	7173.73	1	1	188	1245	188	MAX_20210209_lariat_box484_ex259a_4_w2SpinningDisc - Red.tif	BOX759
189	1	280.808	506.836	1	1	1	279	504	283	510	12	8571.5	4163.25	1	1	189	1248	189	MAX_20210209_lariat_box484_ex259a_4_w2SpinningDisc - Red.tif	BOX759
190	1	281.829	640.53	1	1	1	279	637	284	644	18	19015	5370	1	1	190	1249	190	MAX_20210209_lariat_box484_ex259a_4_w2SpinningDisc - Red.tif	BOX759
191	1	280.139	757.29	1	1	1	279	755	282	760	5	3043	674	1	0	191	0	191	MAX_20210209_lariat_box484_ex259a_4_w2SpinningDisc - Red.tif	BOX759
192	1	281.412	537.581	1	1	1	280	535	283	541	8	4267	2372.11	1	0	192	0	192	MAX_20210209_lariat_box484_ex259a_4_w2SpinningDisc - Red.tif	BOX759
193	1	281.798	715.166	1	1	1	280	713	284	717	6	3366.25	991.312	1	0	193	0	193	MAX_20210209_lariat_box484_ex259a_4_w2SpinningDisc - Red.tif	BOX759
194	1	283.152	685.853	1	1	1	281	683	285	689	10	12036.8	4884.75	1	1	194	1251	194	MAX_20210209_lariat_box484_ex259a_4_w2SpinningDisc - Red.tif	BOX759
195	1	283.203	944.206	1	1	1	281	940	286	949	22	35344.6	20827.7	1	1	195	1250	195	MAX_20210209_lariat_box484_ex259a_4_w2SpinningDisc - Red.tif	BOX759
196	1	284.504	554.401	1	1	1	283	552	286	557	8	4795	675	1	0	196	0	196	MAX_20210209_lariat_box484_ex259a_4_w2SpinningDisc - Red.tif	BOX759
197	1	284.925	692.872	1	1	1	283	690	287	696	11	10127.8	2858	1	0	197	0	197	MAX_20210209_lariat_box484_ex259a_4_w2SpinningDisc - Red.tif	BOX759
198	1	285.226	786.158	1	1	1	283	784	287	789	8	5368.33	-55.3333	1	0	198	0	198	MAX_20210209_lariat_box484_ex259a_4_w2SpinningDisc - Red.tif	BOX759
199	1	285.853	767.399	1	1	1	284	765	288	770	10	7448.67	3970.33	1	0	199	0	199	MAX_20210209_lariat_box484_ex259a_4_w2SpinningDisc - Red.tif	BOX759
200	1	287.958	535.485	1	1	1	285	531	291	541	25	42716.6	17399.1	1	1	200	1252	200	MAX_20210209_lariat_box484_ex259a_4_w2SpinningDisc - Red.tif	BOX759
201	1	286.997	545.118	1	1	1	285	543	289	548	10	7636.33	3536	1	0	201	0	201	MAX_20210209_lariat_box484_ex259a_4_w2SpinningDisc - Red.tif	BOX759
202	1	287.393	564.648	1	1	1	285	562	290	568	13	24505.5	8139.27	1	1	202	1253	202	MAX_20210209_lariat_box484_ex259a_4_w2SpinningDisc - Red.tif	BOX759
203	1	287.635	817.499	1	1	1	285	814	290	823	19	35101.6	17807.6	1	1	203	1254	203	MAX_20210209_lariat_box484_ex259a_4_w2SpinningDisc - Red.tif	BOX759
204	1	288.583	497.342	1	1	1	286	495	291	501	13	42352.6	17168.9	1	1	204	1255	204	MAX_20210209_lariat_box484_ex259a_4_w2SpinningDisc - Red.tif	BOX759
205	1	288.156	581.246	1	1	1	286	579	290	584	9	5995.33	926.333	1	0	205	0	205	MAX_20210209_lariat_box484_ex259a_4_w2SpinningDisc - Red.tif	BOX759
206	1	288.485	611.939	1	1	1	286	610	291	614	8	7103.67	1128.33	1	0	206	0	206	MAX_20210209_lariat_box484_ex259a_4_w2SpinningDisc - Red.tif	BOX759
207	1	288.006	671.788	1	1	1	286	669	290	675	9	5886.25	639	1	0	207	0	207	MAX_20210209_lariat_box484_ex259a_4_w2SpinningDisc - Red.tif	BOX759
208	1	287	802.918	1	1	1	286	801	288	805	3	544	645	1	0	208	0	208	MAX_20210209_lariat_box484_ex259a_4_w2SpinningDisc - Red.tif	BOX759
209	1	290.419	519.366	1	1	1	288	517	293	523	13	31393.1	14102.6	1	1	209	1256	209	MAX_20210209_lariat_box484_ex259a_4_w2SpinningDisc - Red.tif	BOX759
210	1	289.872	574.264	1	1	1	288	572	292	577	9	5970.33	552	1	0	210	0	210	MAX_20210209_lariat_box484_ex259a_4_w2SpinningDisc - Red.tif	BOX759
211	1	289.766	593.65	1	1	1	288	591	292	597	11	7017	2071.75	1	0	211	0	211	MAX_20210209_lariat_box484_ex259a_4_w2SpinningDisc - Red.tif	BOX759
212	1	290.505	656.407	1	1	1	288	654	293	660	12	17272.7	8280.73	1	1	212	1257	212	MAX_20210209_lariat_box484_ex259a_4_w2SpinningDisc - Red.tif	BOX759
213	1	289.842	745.826	1	1	1	288	744	292	748	8	3869.94	732.75	1	0	213	0	213	MAX_20210209_lariat_box484_ex259a_4_w2SpinningDisc - Red.tif	BOX759
214	1	289.722	765.357	1	1	1	288	762	291	769	9	7694.4	1502.4	1	0	214	0	214	MAX_20210209_lariat_box484_ex259a_4_w2SpinningDisc - Red.tif	BOX759
215	1	291.333	647.109	1	1	1	289	644	294	651	13	18553	7900	1	1	215	1258	215	MAX_20210209_lariat_box484_ex259a_4_w2SpinningDisc - Red.tif	BOX759
216	1	291.179	680.935	1	1	1	289	678	293	684	13	11400.8	3588.5	1	1	216	1259	216	MAX_20210209_lariat_box484_ex259a_4_w2SpinningDisc - Red.tif	BOX759
217	1	291.318	792.442	1	1	1	289	790	293	795	7	2903	1337.67	1	0	217	0	217	MAX_20210209_lariat_box484_ex259a_4_w2SpinningDisc - Red.tif	BOX759
218	1	293.23	627.012	1	1	1	290	622	296	632	24	29069.5	9802.38	1	1	218	1262	218	MAX_20210209_lariat_box484_ex259a_4_w2SpinningDisc - Red.tif	BOX759
219	1	291.848	637.292	1	1	1	290	635	294	640	9	6135.67	1430.33	1	0	219	0	219	MAX_20210209_lariat_box484_ex259a_4_w2SpinningDisc - Red.tif	BOX759
220	1	291.546	713.549	1	1	1	290	711	293	716	8	5359	1616.5	1	0	220	0	220	MAX_20210209_lariat_box484_ex259a_4_w2SpinningDisc - Red.tif	BOX759
221	1	292.284	785.541	1	1	1	290	783	294	788	8	4649	1645.67	1	0	221	0	221	MAX_20210209_lariat_box484_ex259a_4_w2SpinningDisc - Red.tif	BOX759
222	1	293.763	566.285	1	1	1	291	563	296	571	16	24229.2	12055.4	1	1	222	1261	222	MAX_20210209_lariat_box484_ex259a_4_w2SpinningDisc - Red.tif	BOX759
223	1	292.904	695.201	1	1	1	291	692	295	699	12	11041.4	6218.27	1	1	223	1260	223	MAX_20210209_lariat_box484_ex259a_4_w2SpinningDisc - Red.tif	BOX759
224	1	293.517	461.994	1	1	1	292	460	295	464	6	1747.86	1333.86	1	0	224	0	224	MAX_20210209_lariat_box484_ex259a_4_w2SpinningDisc - Red.tif	BOX759
225	1	293.759	501.156	1	1	1	292	499	296	503	6	5202.88	371.75	1	0	225	0	225	MAX_20210209_lariat_box484_ex259a_4_w2SpinningDisc - Red.tif	BOX759
226	1	294.07	600.521	1	1	1	292	598	296	604	10	8318.5	1919	1	0	226	0	226	MAX_20210209_lariat_box484_ex259a_4_w2SpinningDisc - Red.tif	BOX759
227	1	294.232	726.545	1	1	1	292	724	296	729	8	5192	1653.67	1	0	227	0	227	MAX_20210209_lariat_box484_ex259a_4_w2SpinningDisc - Red.tif	BOX759
228	1	293.352	814.558	1	1	1	292	811	295	818	10	5385.4	1566.2	1	0	228	0	228	MAX_20210209_lariat_box484_ex259a_4_w2SpinningDisc - Red.tif	BOX759
229	1	295.135	514.111	1	1	1	293	512	297	517	9	6264.67	1534.67	1	0	229	0	229	MAX_20210209_lariat_box484_ex259a_4_w2SpinningDisc - Red.tif	BOX759
230	1	295.082	718.799	1	1	1	293	716	297	722	12	8421.25	2195.75	1	0	230	0	230	MAX_20210209_lariat_box484_ex259a_4_w2SpinningDisc - Red.tif	BOX759
231	1	297.233	470.953	1	1	1	294	468	300	475	16	63994.4	28157.5	1	1	231	1264	231	MAX_20210209_lariat_box484_ex259a_4_w2SpinningDisc - Red.tif	BOX759
232	1	296.609	591.14	1	1	1	294	588	299	595	16	18500	10555	1	1	232	1263	232	MAX_20210209_lariat_box484_ex259a_4_w2SpinningDisc - Red.tif	BOX759
233	1	295.847	735.252	1	1	1	294	733	297	738	5	2682.5	449.5	1	0	233	0	233	MAX_20210209_lariat_box484_ex259a_4_w2SpinningDisc - Red.tif	BOX759
234	1	295.789	760.84	1	1	1	294	758	297	763	5	1699	514	1	0	234	0	234	MAX_20210209_lariat_box484_ex259a_4_w2SpinningDisc - Red.tif	BOX759
235	1	295.542	769.465	1	1	1	294	767	297	772	8	4551.5	1263.5	1	0	235	0	235	MAX_20210209_lariat_box484_ex259a_4_w2SpinningDisc - Red.tif	BOX759
236	1	296.914	478.074	1	1	1	295	476	299	481	10	12244	2433.67	1	0	236	0	236	MAX_20210209_lariat_box484_ex259a_4_w2SpinningDisc - Red.tif	BOX759
237	1	296.598	539.773	1	1	1	295	538	298	542	5	2584.43	921.571	1	0	237	0	237	MAX_20210209_lariat_box484_ex259a_4_w2SpinningDisc - Red.tif	BOX759
238	1	296.86	578.558	1	1	1	295	576	299	582	10	6447.25	2419.5	1	0	238	0	238	MAX_20210209_lariat_box484_ex259a_4_w2SpinningDisc - Red.tif	BOX759
239	1	297.856	505.042	1	1	1	296	502	300	508	10	6454	919.25	1	0	239	0	239	MAX_20210209_lariat_box484_ex259a_4_w2SpinningDisc - Red.tif	BOX759
240	1	298.183	525.202	1	1	1	296	523	300	527	6	4094.31	320.25	1	0	240	0	240	MAX_20210209_lariat_box484_ex259a_4_w2SpinningDisc - Red.tif	BOX759
241	1	298.305	803.35	1	1	1	296	800	301	808	20	30034.5	16250.8	1	1	241	1265	241	MAX_20210209_lariat_box484_ex259a_4_w2SpinningDisc - Red.tif	BOX759
242	1	298.37	485.18	1	1	1	297	483	300	487	5	2510.86	382.429	1	0	242	0	242	MAX_20210209_lariat_box484_ex259a_4_w2SpinningDisc - Red.tif	BOX759
243	1	299.371	770.784	1	1	1	298	769	301	773	5	2749.29	-66.1429	1	0	243	0	243	MAX_20210209_lariat_box484_ex259a_4_w2SpinningDisc - Red.tif	BOX759
244	1	301.055	448.99	1	1	1	299	446	303	452	11	8050	4196.5	1	1	244	1266	244	MAX_20210209_lariat_box484_ex259a_4_w2SpinningDisc - Red.tif	BOX759
245	1	302.321	624.994	1	1	1	299	622	305	628	16	16112.5	8222.46	1	1	245	1269	245	MAX_20210209_lariat_box484_ex259a_4_w2SpinningDisc - Red.tif	BOX759
246	1	301.647	678.238	1	1	1	299	674	304	683	18	23028.4	11267.3	1	1	246	1270	246	MAX_20210209_lariat_box484_ex259a_4_w2SpinningDisc - Red.tif	BOX759
247	1	301.856	496.127	1	1	1	300	493	304	499	12	13789	4272.75	1	1	247	1267	247	MAX_20210209_lariat_box484_ex259a_4_w2SpinningDisc - Red.tif	BOX759
248	1	301.501	511.431	1	1	1	300	509	303	514	8	6294	1132	1	0	248	0	248	MAX_20210209_lariat_box484_ex259a_4_w2SpinningDisc - Red.tif	BOX759
249	1	301.938	538.922	1	1	1	300	536	304	542	11	13582.8	4284.75	1	1	249	1268	249	MAX_20210209_lariat_box484_ex259a_4_w2SpinningDisc - Red.tif	BOX759
250	1	301.532	613.943	1	1	1	300	612	303	616	6	2824	21.5714	1	0	250	0	250	MAX_20210209_lariat_box484_ex259a_4_w2SpinningDisc - Red.tif	BOX759
251	1	302.09	776.613	1	1	1	300	774	304	779	9	6994.67	347	1	0	251	0	251	MAX_20210209_lariat_box484_ex259a_4_w2SpinningDisc - Red.tif	BOX759
252	1	302.386	699.767	1	1	1	301	698	304	702	5	2186.71	321	1	0	252	0	252	MAX_20210209_lariat_box484_ex259a_4_w2SpinningDisc - Red.tif	BOX759
253	1	302.491	725.819	1	1	1	301	724	304	728	6	3730.57	900.714	1	0	253	0	253	MAX_20210209_lariat_box484_ex259a_4_w2SpinningDisc - Red.tif	BOX759
254	1	303.283	730.772	1	1	1	301	728	305	733	8	4381.33	2003	1	0	254	0	254	MAX_20210209_lariat_box484_ex259a_4_w2SpinningDisc - Red.tif	BOX759
255	1	304.499	718.179	1	1	1	302	716	307	721	14	16998.2	4842.8	1	1	255	1272	255	MAX_20210209_lariat_box484_ex259a_4_w2SpinningDisc - Red.tif	BOX759
256	1	303.413	754.197	1	1	1	302	752	305	756	5	2095.57	22.8571	1	0	256	0	256	MAX_20210209_lariat_box484_ex259a_4_w2SpinningDisc - Red.tif	BOX759
257	1	303.517	782.466	1	1	1	302	779	305	786	12	5187	1377	1	0	257	0	257	MAX_20210209_lariat_box484_ex259a_4_w2SpinningDisc - Red.tif	BOX759
258	1	305.483	555.858	1	1	1	303	553	308	559	14	11583.2	5393.27	1	1	258	1274	258	MAX_20210209_lariat_box484_ex259a_4_w2SpinningDisc - Red.tif	BOX759
259	1	304.48	684.87	1	1	1	303	683	306	687	6	4229.71	814.286	1	0	259	0	259	MAX_20210209_lariat_box484_ex259a_4_w2SpinningDisc - Red.tif	BOX759
260	1	305.007	690.515	1	1	1	303	688	307	694	12	17827	9027.25	1	1	260	1271	260	MAX_20210209_lariat_box484_ex259a_4_w2SpinningDisc - Red.tif	BOX759
261	1	305.068	741.967	1	1	1	303	739	307	745	11	10941.2	4119.75	1	1	261	1273	261	MAX_20210209_lariat_box484_ex259a_4_w2SpinningDisc - Red.tif	BOX759
262	1	305.242	767.1	1	1	1	303	764	308	770	13	17567.3	7181.45	1	1	262	1276	262	MAX_20210209_lariat_box484_ex259a_4_w2SpinningDisc - Red.tif	BOX759
263	1	304.952	795.42	1	1	1	303	793	307	798	10	6011.33	1506.33	1	0	263	0	263	MAX_20210209_lariat_box484_ex259a_4_w2SpinningDisc - Red.tif	BOX759
264	1	305.403	509.423	1	1	1	304	508	307	511	4	2554.33	188.333	1	0	264	0	264	MAX_20210209_lariat_box484_ex259a_4_w2SpinningDisc - Red.tif	BOX759
265	1	306.041	587.836	1	1	1	304	585	308	591	12	10961.8	4867.25	1	1	265	1275	265	MAX_20210209_lariat_box484_ex259a_4_w2SpinningDisc - Red.tif	BOX759
266	1	305.729	604.508	1	1	1	304	602	307	607	6	2752	555.5	1	0	266	0	266	MAX_20210209_lariat_box484_ex259a_4_w2SpinningDisc - Red.tif	BOX759
267	1	305.731	665.61	1	1	1	304	664	307	667	3	2028.33	362	1	0	267	0	267	MAX_20210209_lariat_box484_ex259a_4_w2SpinningDisc - Red.tif	BOX759
268	1	307.805	496.868	1	1	1	305	494	310	500	13	15874.2	5411.18	1	1	268	1277	268	MAX_20210209_lariat_box484_ex259a_4_w2SpinningDisc - Red.tif	BOX759
269	1	307.771	648.811	1	1	1	305	646	310	653	14	21970	7844	1	1	269	1278	269	MAX_20210209_lariat_box484_ex259a_4_w2SpinningDisc - Red.tif	BOX759
270	1	310	696.116	1	1	1	306	693	314	699	15	14255.5	2720.75	1	0	270	0	270	MAX_20210209_lariat_box484_ex259a_4_w2SpinningDisc - Red.tif	BOX759
271	1	307.399	752.238	1	1	1	306	750	309	755	7	4148	1054.5	1	0	271	0	271	MAX_20210209_lariat_box484_ex259a_4_w2SpinningDisc - Red.tif	BOX759
272	1	307.574	760.335	1	1	1	306	758	309	763	7	2763.5	1531.5	1	0	272	0	272	MAX_20210209_lariat_box484_ex259a_4_w2SpinningDisc - Red.tif	BOX759
273	1	308.973	470.136	1	1	1	307	468	311	473	10	8118	3081	1	1	273	1280	273	MAX_20210209_lariat_box484_ex259a_4_w2SpinningDisc - Red.tif	BOX759
274	1	309.024	515.125	1	1	1	307	512	311	519	12	15220.5	7142.55	1	1	274	1279	274	MAX_20210209_lariat_box484_ex259a_4_w2SpinningDisc - Red.tif	BOX759
275	1	309.493	729.785	1	1	1	307	727	312	733	14	14986.5	4701.55	1	1	275	1281	275	MAX_20210209_lariat_box484_ex259a_4_w2SpinningDisc - Red.tif	BOX759
276	1	309.064	787.314	1	1	1	307	785	311	790	9	7017.33	1073.67	1	0	276	0	276	MAX_20210209_lariat_box484_ex259a_4_w2SpinningDisc - Red.tif	BOX759
277	1	310.242	422.508	1	1	1	308	420	312	425	10	4725	2112.67	1	0	277	0	277	MAX_20210209_lariat_box484_ex259a_4_w2SpinningDisc - Red.tif	BOX759
278	1	311.515	640.484	1	1	1	309	638	314	643	12	12054.2	3054.4	1	1	278	1282	278	MAX_20210209_lariat_box484_ex259a_4_w2SpinningDisc - Red.tif	BOX759
279	1	311.102	667.295	1	1	1	309	665	313	670	9	5444	387.333	1	0	279	0	279	MAX_20210209_lariat_box484_ex259a_4_w2SpinningDisc - Red.tif	BOX759
280	1	310.641	709.67	1	1	1	309	708	312	711	3	1368.33	-56	1	0	280	0	280	MAX_20210209_lariat_box484_ex259a_4_w2SpinningDisc - Red.tif	BOX759
281	1	310.616	715.963	1	1	1	309	713	313	720	12	9198.55	3888.82	1	0	281	0	281	MAX_20210209_lariat_box484_ex259a_4_w2SpinningDisc - Red.tif	BOX759
282	1	311.573	763.852	1	1	1	309	761	314	767	14	14779.1	6553.55	1	1	282	1283	282	MAX_20210209_lariat_box484_ex259a_4_w2SpinningDisc - Red.tif	BOX759
283	1	311.721	618.237	1	1	1	310	615	313	621	7	3360.56	486.222	1	0	283	0	283	MAX_20210209_lariat_box484_ex259a_4_w2SpinningDisc - Red.tif	BOX759
284	1	312.785	649.961	1	1	1	310	647	315	654	12	19528	7475	1	1	284	1285	284	MAX_20210209_lariat_box484_ex259a_4_w2SpinningDisc - Red.tif	BOX759
285	1	313.541	480.472	1	1	1	311	478	316	484	12	26488.8	10501.1	1	1	285	1284	285	MAX_20210209_lariat_box484_ex259a_4_w2SpinningDisc - Red.tif	BOX759
286	1	312.514	600.546	1	1	1	311	598	314	603	8	4243	1553.5	1	0	286	0	286	MAX_20210209_lariat_box484_ex259a_4_w2SpinningDisc - Red.tif	BOX759
287	1	312.67	630.459	1	1	1	311	626	314	634	10	5668.18	1735.27	1	0	287	0	287	MAX_20210209_lariat_box484_ex259a_4_w2SpinningDisc - Red.tif	BOX759
288	1	313.041	737.923	1	1	1	311	735	315	742	13	11887.1	5818.55	1	1	288	1286	288	MAX_20210209_lariat_box484_ex259a_4_w2SpinningDisc - Red.tif	BOX759
289	1	312.74	747.481	1	1	1	311	744	315	750	9	5603.25	1952.25	1	0	289	0	289	MAX_20210209_lariat_box484_ex259a_4_w2SpinningDisc - Red.tif	BOX759
290	1	314.981	430.413	1	1	1	312	428	318	434	16	16899.9	8815.12	1	1	290	1288	290	MAX_20210209_lariat_box484_ex259a_4_w2SpinningDisc - Red.tif	BOX759
291	1	313.508	559.947	1	1	1	312	558	315	562	6	1967.86	348.857	1	0	291	0	291	MAX_20210209_lariat_box484_ex259a_4_w2SpinningDisc - Red.tif	BOX759
292	1	313.612	576.009	1	1	1	312	574	315	578	6	4017.57	356	1	0	292	0	292	MAX_20210209_lariat_box484_ex259a_4_w2SpinningDisc - Red.tif	BOX759
293	1	314.554	463.476	1	1	1	313	461	316	466	8	4517	1036	1	0	293	0	293	MAX_20210209_lariat_box484_ex259a_4_w2SpinningDisc - Red.tif	BOX759
294	1	314.506	548.965	1	1	1	313	547	316	551	6	1611.86	399.571	1	0	294	0	294	MAX_20210209_lariat_box484_ex259a_4_w2SpinningDisc - Red.tif	BOX759
295	1	315	455.42	1	1	1	314	453	316	458	4	1478.29	595.714	1	0	295	0	295	MAX_20210209_lariat_box484_ex259a_4_w2SpinningDisc - Red.tif	BOX759
296	1	316.647	579.909	1	1	1	314	577	319	583	13	7865.09	1566.73	1	0	296	0	296	MAX_20210209_lariat_box484_ex259a_4_w2SpinningDisc - Red.tif	BOX759
297	1	317.457	686.331	1	1	1	315	683	320	690	19	41554	16880	1	1	297	1289	297	MAX_20210209_lariat_box484_ex259a_4_w2SpinningDisc - Red.tif	BOX759
298	1	318.226	535.606	1	1	1	316	534	320	537	5	2497.71	233.857	1	0	298	0	298	MAX_20210209_lariat_box484_ex259a_4_w2SpinningDisc - Red.tif	BOX759
299	1	319.019	567.353	1	1	1	316	564	322	571	16	25759.5	7510.54	1	1	299	1292	299	MAX_20210209_lariat_box484_ex259a_4_w2SpinningDisc - Red.tif	BOX759
300	1	317.984	614.908	1	1	1	316	612	320	618	11	15362.8	4811.25	1	1	300	1293	300	MAX_20210209_lariat_box484_ex259a_4_w2SpinningDisc - Red.tif	BOX759
301	1	317.463	761.196	1	1	1	316	758	319	764	7	3326.11	1060.44	1	0	301	0	301	MAX_20210209_lariat_box484_ex259a_4_w2SpinningDisc - Red.tif	BOX759
302	1	318.028	818.67	1	1	1	316	816	320	822	13	9691.75	5219	1	1	302	1291	302	MAX_20210209_lariat_box484_ex259a_4_w2SpinningDisc - Red.tif	BOX759
303	1	319.195	524.687	1	1	1	317	522	321	527	9	6062	795	1	0	303	0	303	MAX_20210209_lariat_box484_ex259a_4_w2SpinningDisc - Red.tif	BOX759
304	1	318.78	554.844	1	1	1	317	553	321	557	8	7473.94	1772.25	1	0	304	0	304	MAX_20210209_lariat_box484_ex259a_4_w2SpinningDisc - Red.tif	BOX759
305	1	319.709	592.088	1	1	1	317	589	322	595	13	8328.18	5010.45	1	1	305	1294	305	MAX_20210209_lariat_box484_ex259a_4_w2SpinningDisc - Red.tif	BOX759
306	1	318.38	643.173	1	1	1	317	641	320	645	5	2236.43	373.286	1	0	306	0	306	MAX_20210209_lariat_box484_ex259a_4_w2SpinningDisc - Red.tif	BOX759
307	1	318.595	661.732	1	1	1	317	660	320	664	5	2701.14	1162.57	1	0	307	0	307	MAX_20210209_lariat_box484_ex259a_4_w2SpinningDisc - Red.tif	BOX759
308	1	320.386	540.327	1	1	1	318	538	323	543	13	12701.2	2210.2	1	0	308	0	308	MAX_20210209_lariat_box484_ex259a_4_w2SpinningDisc - Red.tif	BOX759
309	1	321.22	890.383	1	1	1	319	887	324	894	17	19870	9446	1	1	309	1295	309	MAX_20210209_lariat_box484_ex259a_4_w2SpinningDisc - Red.tif	BOX759
310	1	321.483	580.881	1	1	1	320	579	323	583	6	5383.71	217.429	1	0	310	0	310	MAX_20210209_lariat_box484_ex259a_4_w2SpinningDisc - Red.tif	BOX759
311	1	321.645	727.692	1	1	1	320	726	323	729	3	963.667	361.667	1	0	311	0	311	MAX_20210209_lariat_box484_ex259a_4_w2SpinningDisc - Red.tif	BOX759
312	1	323.794	653.075	1	1	1	321	650	326	657	13	16319	7930	1	1	312	1296	312	MAX_20210209_lariat_box484_ex259a_4_w2SpinningDisc - Red.tif	BOX759
313	1	323.381	908.316	1	1	1	321	906	325	911	9	6883	2940.33	1	1	313	1297	313	MAX_20210209_lariat_box484_ex259a_4_w2SpinningDisc - Red.tif	BOX759
314	1	322.853	990.097	1	1	1	321	987	325	994	14	13630.2	5131.27	1	1	314	1298	314	MAX_20210209_lariat_box484_ex259a_4_w2SpinningDisc - Red.tif	BOX759
315	1	323.624	617.779	1	1	1	322	616	325	620	5	2084.14	631.571	1	0	315	0	315	MAX_20210209_lariat_box484_ex259a_4_w2SpinningDisc - Red.tif	BOX759
316	1	323.786	736.285	1	1	1	322	734	326	739	10	4763.33	1559	1	0	316	0	316	MAX_20210209_lariat_box484_ex259a_4_w2SpinningDisc - Red.tif	BOX759
317	1	323	745.92	1	1	1	322	744	324	748	3	1056.25	308.25	1	0	317	0	317	MAX_20210209_lariat_box484_ex259a_4_w2SpinningDisc - Red.tif	BOX759
318	1	323.499	795.544	1	1	1	322	793	325	798	8	4285	754	1	0	318	0	318	MAX_20210209_lariat_box484_ex259a_4_w2SpinningDisc - Red.tif	BOX759
319	1	325.704	429.87	1	1	1	323	428	328	432	9	6005.33	1911.67	1	0	319	0	319	MAX_20210209_lariat_box484_ex259a_4_w2SpinningDisc - Red.tif	BOX759
320	1	324.997	489.211	1	1	1	323	487	327	491	7	3798	570.312	1	0	320	0	320	MAX_20210209_lariat_box484_ex259a_4_w2SpinningDisc - Red.tif	BOX759
321	1	325.162	524.579	1	1	1	323	522	328	528	12	15758.7	3793.36	1	1	321	1299	321	MAX_20210209_lariat_box484_ex259a_4_w2SpinningDisc - Red.tif	BOX759
322	1	324.702	677.695	1	1	1	323	676	326	679	3	1765	-156	1	0	322	0	322	MAX_20210209_lariat_box484_ex259a_4_w2SpinningDisc - Red.tif	BOX759
323	1	324.462	681.392	1	1	1	323	680	326	683	4	1107.33	380.333	1	0	323	0	323	MAX_20210209_lariat_box484_ex259a_4_w2SpinningDisc - Red.tif	BOX759
324	1	324.793	802.036	1	1	1	323	799	327	805	13	11910.8	3176	1	0	324	0	324	MAX_20210209_lariat_box484_ex259a_4_w2SpinningDisc - Red.tif	BOX759
325	1	324.577	826.186	1	1	1	323	824	326	828	5	2974.43	-49.2857	1	0	325	0	325	MAX_20210209_lariat_box484_ex259a_4_w2SpinningDisc - Red.tif	BOX759
326	1	325.348	442.274	1	1	1	324	441	327	444	3	1696.67	-49	1	0	326	0	326	MAX_20210209_lariat_box484_ex259a_4_w2SpinningDisc - Red.tif	BOX759
327	1	325	582.93	1	1	1	324	581	326	585	3	1268.75	261.75	1	0	327	0	327	MAX_20210209_lariat_box484_ex259a_4_w2SpinningDisc - Red.tif	BOX759
328	1	325.413	819.623	1	1	1	324	817	327	822	7	3295.5	532.5	1	0	328	0	328	MAX_20210209_lariat_box484_ex259a_4_w2SpinningDisc - Red.tif	BOX759
329	1	325.702	975.977	1	1	1	324	973	328	980	13	7378.36	1250.18	1	0	329	0	329	MAX_20210209_lariat_box484_ex259a_4_w2SpinningDisc - Red.tif	BOX759
330	1	327.996	455.401	1	1	1	325	452	331	459	19	23893.6	9729.85	1	1	330	1302	330	MAX_20210209_lariat_box484_ex259a_4_w2SpinningDisc - Red.tif	BOX759
331	1	327.789	464.104	1	1	1	325	461	330	467	13	11097.4	2820.73	1	0	331	0	331	MAX_20210209_lariat_box484_ex259a_4_w2SpinningDisc - Red.tif	BOX759
332	1	327.198	495.435	1	1	1	325	493	330	498	9	8048.8	1057.6	1	0	332	0	332	MAX_20210209_lariat_box484_ex259a_4_w2SpinningDisc - Red.tif	BOX759
333	1	327.975	507.624	1	1	1	325	505	330	510	12	11165	1081.6	1	0	333	0	333	MAX_20210209_lariat_box484_ex259a_4_w2SpinningDisc - Red.tif	BOX759
334	1	326.4	540.238	1	1	1	325	538	328	542	5	2338.14	938.286	1	0	334	0	334	MAX_20210209_lariat_box484_ex259a_4_w2SpinningDisc - Red.tif	BOX759
335	1	327.56	545.72	1	1	1	325	543	330	549	13	13178.4	2900.45	1	0	335	0	335	MAX_20210209_lariat_box484_ex259a_4_w2SpinningDisc - Red.tif	BOX759
336	1	327.233	595.685	1	1	1	325	593	330	599	16	25895.2	8098	1	1	336	1300	336	MAX_20210209_lariat_box484_ex259a_4_w2SpinningDisc - Red.tif	BOX759
337	1	328.197	609.309	1	1	1	325	605	331	615	22	28947.5	15568.3	1	1	337	1305	337	MAX_20210209_lariat_box484_ex259a_4_w2SpinningDisc - Red.tif	BOX759
338	1	326.826	689.206	1	1	1	325	686	329	693	12	12526	5759.55	1	1	338	1301	338	MAX_20210209_lariat_box484_ex259a_4_w2SpinningDisc - Red.tif	BOX759
339	1	327.877	778.83	1	1	1	325	776	331	783	15	28756.8	10285.8	1	1	339	1303	339	MAX_20210209_lariat_box484_ex259a_4_w2SpinningDisc - Red.tif	BOX759
340	1	327.528	870.852	1	1	1	325	868	330	875	14	14694	5793	1	1	340	1304	340	MAX_20210209_lariat_box484_ex259a_4_w2SpinningDisc - Red.tif	BOX759
341	1	327.948	657.997	1	1	1	326	656	330	660	5	2685.62	358.812	1	0	341	0	341	MAX_20210209_lariat_box484_ex259a_4_w2SpinningDisc - Red.tif	BOX759
342	1	328.002	666.992	1	1	1	326	665	330	670	8	4797.33	277	1	0	342	0	342	MAX_20210209_lariat_box484_ex259a_4_w2SpinningDisc - Red.tif	BOX759
343	1	328.039	984.974	1	1	1	326	983	330	987	5	3807.69	281.25	1	0	343	0	343	MAX_20210209_lariat_box484_ex259a_4_w2SpinningDisc - Red.tif	BOX759
344	1	328.766	471.426	1	1	1	327	469	331	474	10	8765.67	1072.33	1	0	344	0	344	MAX_20210209_lariat_box484_ex259a_4_w2SpinningDisc - Red.tif	BOX759
345	1	328.931	646.985	1	1	1	327	645	331	649	7	1593.75	263.812	1	0	345	0	345	MAX_20210209_lariat_box484_ex259a_4_w2SpinningDisc - Red.tif	BOX759
346	1	328.904	696.142	1	1	1	327	693	331	699	12	14190	1544	1	1	346	1308	346	MAX_20210209_lariat_box484_ex259a_4_w2SpinningDisc - Red.tif	BOX759
347	1	329.5	837.081	1	1	1	327	834	332	840	16	30811.3	13874.7	1	1	347	1307	347	MAX_20210209_lariat_box484_ex259a_4_w2SpinningDisc - Red.tif	BOX759
348	1	329.502	558.474	1	1	1	328	557	331	560	4	1274.33	-226.333	1	0	348	0	348	MAX_20210209_lariat_box484_ex259a_4_w2SpinningDisc - Red.tif	BOX759
349	1	329.611	638.176	1	1	1	328	636	331	640	5	3524.86	53.4286	1	0	349	0	349	MAX_20210209_lariat_box484_ex259a_4_w2SpinningDisc - Red.tif	BOX759
350	1	330.994	425.47	1	1	1	329	422	333	429	14	11216.5	6585.27	1	1	350	1309	350	MAX_20210209_lariat_box484_ex259a_4_w2SpinningDisc - Red.tif	BOX759
351	1	331.702	438.785	1	1	1	329	436	334	443	14	25067	11590	1	1	351	1310	351	MAX_20210209_lariat_box484_ex259a_4_w2SpinningDisc - Red.tif	BOX759
352	1	332.331	551.474	1	1	1	329	550	336	553	12	5975.8	675.2	1	0	352	0	352	MAX_20210209_lariat_box484_ex259a_4_w2SpinningDisc - Red.tif	BOX759
353	1	332.159	576.857	1	1	1	329	575	335	579	12	10873.2	1618.5	1	0	353	0	353	MAX_20210209_lariat_box484_ex259a_4_w2SpinningDisc - Red.tif	BOX759
354	1	331.102	747.218	1	1	1	329	745	333	750	9	7034	2570.33	1	0	354	0	354	MAX_20210209_lariat_box484_ex259a_4_w2SpinningDisc - Red.tif	BOX759
355	1	331.381	773.648	1	1	1	329	771	333	776	9	7508.67	1956.67	1	0	355	0	355	MAX_20210209_lariat_box484_ex259a_4_w2SpinningDisc - Red.tif	BOX759
356	1	332.366	962.86	1	1	1	329	959	335	970	22	65474.8	32537.1	1	1	356	1311	356	MAX_20210209_lariat_box484_ex259a_4_w2SpinningDisc - Red.tif	BOX759
357	1	331.467	808.919	1	1	1	330	807	333	811	6	2893.43	871.714	1	0	357	0	357	MAX_20210209_lariat_box484_ex259a_4_w2SpinningDisc - Red.tif	BOX759
358	1	331.817	850.598	1	1	1	330	848	334	853	7	3629.33	1299	1	0	358	0	358	MAX_20210209_lariat_box484_ex259a_4_w2SpinningDisc - Red.tif	BOX759
359	1	333.793	486.41	1	1	1	331	484	336	490	13	17712.6	7651.45	1	1	359	1314	359	MAX_20210209_lariat_box484_ex259a_4_w2SpinningDisc - Red.tif	BOX759
360	1	333.315	499.642	1	1	1	331	497	336	504	14	17741	6624	1	1	360	1312	360	MAX_20210209_lariat_box484_ex259a_4_w2SpinningDisc - Red.tif	BOX759
361	1	333.504	625.879	1	1	1	331	622	336	631	21	41781	15854	1	1	361	1315	361	MAX_20210209_lariat_box484_ex259a_4_w2SpinningDisc - Red.tif	BOX759
362	1	333.752	732.292	1	1	1	331	729	336	736	14	21341	8402	1	1	362	1316	362	MAX_20210209_lariat_box484_ex259a_4_w2SpinningDisc - Red.tif	BOX759
363	1	332.653	888.767	1	1	1	331	887	334	891	5	2063.29	140.857	1	0	363	0	363	MAX_20210209_lariat_box484_ex259a_4_w2SpinningDisc - Red.tif	BOX759
364	1	334.295	419.066	1	1	1	332	417	336	421	7	3731.25	656.375	1	0	364	0	364	MAX_20210209_lariat_box484_ex259a_4_w2SpinningDisc - Red.tif	BOX759
365	1	334.331	447.597	1	1	1	332	445	337	450	11	8947	1515.6	1	0	365	0	365	MAX_20210209_lariat_box484_ex259a_4_w2SpinningDisc - Red.tif	BOX759
366	1	334.415	479.241	1	1	1	332	476	337	483	14	26577	10949	1	1	366	1313	366	MAX_20210209_lariat_box484_ex259a_4_w2SpinningDisc - Red.tif	BOX759
367	1	333.782	615.94	1	1	1	332	613	336	619	13	11538	3251.5	1	0	367	0	367	MAX_20210209_lariat_box484_ex259a_4_w2SpinningDisc - Red.tif	BOX759
368	1	333.922	751.098	1	1	1	332	749	336	754	10	8654.67	1639.67	1	0	368	0	368	MAX_20210209_lariat_box484_ex259a_4_w2SpinningDisc - Red.tif	BOX759
369	1	333.742	861.235	1	1	1	332	859	336	864	8	4310.33	2439	1	0	369	0	369	MAX_20210209_lariat_box484_ex259a_4_w2SpinningDisc - Red.tif	BOX759
370	1	335.793	431.296	1	1	1	333	429	339	434	14	20902.8	7290.55	1	1	370	1317	370	MAX_20210209_lariat_box484_ex259a_4_w2SpinningDisc - Red.tif	BOX759
371	1	334.218	515.903	1	1	1	333	514	336	518	4	1665.43	1400.71	1	0	371	0	371	MAX_20210209_lariat_box484_ex259a_4_w2SpinningDisc - Red.tif	BOX759
372	1	335.436	535.414	1	1	1	333	533	338	539	12	25322.3	8358	1	1	372	1318	372	MAX_20210209_lariat_box484_ex259a_4_w2SpinningDisc - Red.tif	BOX759
373	1	336.311	572.109	1	1	1	333	568	340	576	19	21534	6653	1	1	373	1323	373	MAX_20210209_lariat_box484_ex259a_4_w2SpinningDisc - Red.tif	BOX759
374	1	335.101	832.681	1	1	1	333	830	337	836	11	9590	2533.75	1	0	374	0	374	MAX_20210209_lariat_box484_ex259a_4_w2SpinningDisc - Red.tif	BOX759
375	1	335.616	903.408	1	1	1	333	901	338	907	14	25484.6	9587.27	1	1	375	1320	375	MAX_20210209_lariat_box484_ex259a_4_w2SpinningDisc - Red.tif	BOX759
376	1	334.913	944.341	1	1	1	333	941	337	948	13	9323.45	3915.91	1	0	376	0	376	MAX_20210209_lariat_box484_ex259a_4_w2SpinningDisc - Red.tif	BOX759
377	1	338.008	462.408	1	1	1	334	459	342	466	20	34826.8	12619	1	1	377	1326	377	MAX_20210209_lariat_box484_ex259a_4_w2SpinningDisc - Red.tif	BOX759
378	1	336.652	601.995	1	1	1	334	598	339	606	19	21500.6	6910.23	1	1	378	1321	378	MAX_20210209_lariat_box484_ex259a_4_w2SpinningDisc - Red.tif	BOX759
379	1	335.577	766.305	1	1	1	334	764	338	769	9	7593.67	3812	1	1	379	1319	379	MAX_20210209_lariat_box484_ex259a_4_w2SpinningDisc - Red.tif	BOX759
380	1	336.03	839.285	1	1	1	334	836	338	843	12	8709.91	3881.64	1	0	380	0	380	MAX_20210209_lariat_box484_ex259a_4_w2SpinningDisc - Red.tif	BOX759
381	1	335.349	993.874	1	1	1	334	991	337	997	8	3947.67	794.667	1	0	381	0	381	MAX_20210209_lariat_box484_ex259a_4_w2SpinningDisc - Red.tif	BOX759
382	1	337.375	455.795	1	1	1	335	453	340	459	12	16238.6	4189.55	1	1	382	1322	382	MAX_20210209_lariat_box484_ex259a_4_w2SpinningDisc - Red.tif	BOX759
383	1	337.271	589.245	1	1	1	335	587	340	593	12	15311.6	4647.09	1	1	383	1324	383	MAX_20210209_lariat_box484_ex259a_4_w2SpinningDisc - Red.tif	BOX759
384	1	337.21	633.744	1	1	1	335	631	340	638	14	24486	5936	1	1	384	1325	384	MAX_20210209_lariat_box484_ex259a_4_w2SpinningDisc - Red.tif	BOX759
385	1	336.801	826.98	1	1	1	335	825	338	829	4	1766.86	343.571	1	0	385	0	385	MAX_20210209_lariat_box484_ex259a_4_w2SpinningDisc - Red.tif	BOX759
386	1	337.409	655.732	1	1	1	336	653	339	659	9	6349.67	2591.89	1	0	386	0	386	MAX_20210209_lariat_box484_ex259a_4_w2SpinningDisc - Red.tif	BOX759
387	1	337.887	706.316	1	1	1	336	703	340	710	13	11842	2838.27	1	0	387	0	387	MAX_20210209_lariat_box484_ex259a_4_w2SpinningDisc - Red.tif	BOX759
388	1	338.76	435.889	1	1	1	337	434	341	438	7	6157.62	823.5	1	0	388	0	388	MAX_20210209_lariat_box484_ex259a_4_w2SpinningDisc - Red.tif	BOX759
389	1	339.555	948.984	1	1	1	337	946	342	952	13	15315	3304	1	0	389	0	389	MAX_20210209_lariat_box484_ex259a_4_w2SpinningDisc - Red.tif	BOX759
390	1	339.835	411.39	1	1	1	338	409	342	414	10	7278	3456	1	0	390	0	390	MAX_20210209_lariat_box484_ex259a_4_w2SpinningDisc - Red.tif	BOX759
391	1	339.568	479.811	1	1	1	338	478	341	482	5	2622.29	28.2857	1	0	391	0	391	MAX_20210209_lariat_box484_ex259a_4_w2SpinningDisc - Red.tif	BOX759
392	1	340.368	487.917	1	1	1	338	483	343	494	22	22604.2	7499.75	1	1	392	1329	392	MAX_20210209_lariat_box484_ex259a_4_w2SpinningDisc - Red.tif	BOX759
393	1	339.672	496.516	1	1	1	338	494	342	499	9	6386	779.667	1	0	393	0	393	MAX_20210209_lariat_box484_ex259a_4_w2SpinningDisc - Red.tif	BOX759
394	1	342.774	513.977	1	1	1	338	512	346	517	17	17943.3	2302.15	1	0	394	0	394	MAX_20210209_lariat_box484_ex259a_4_w2SpinningDisc - Red.tif	BOX759
395	1	339.611	865.674	1	1	1	338	864	341	868	5	2745.14	242.143	1	0	395	0	395	MAX_20210209_lariat_box484_ex259a_4_w2SpinningDisc - Red.tif	BOX759
396	1	339.3	876.354	1	1	1	338	875	341	878	3	946.667	229.667	1	0	396	0	396	MAX_20210209_lariat_box484_ex259a_4_w2SpinningDisc - Red.tif	BOX759
397	1	340.623	968.982	1	1	1	338	966	343	973	16	30993	13292	1	1	397	1328	397	MAX_20210209_lariat_box484_ex259a_4_w2SpinningDisc - Red.tif	BOX759
398	1	341.337	441.757	1	1	1	339	439	344	445	14	18632.5	9383.82	1	1	398	1332	398	MAX_20210209_lariat_box484_ex259a_4_w2SpinningDisc - Red.tif	BOX759
399	1	341.302	469.2	1	1	1	339	467	344	472	12	11672	2242.6	1	0	399	0	399	MAX_20210209_lariat_box484_ex259a_4_w2SpinningDisc - Red.tif	BOX759
400	1	341.082	546.146	1	1	1	339	544	343	549	10	9853.67	1956.67	1	0	400	0	400	MAX_20210209_lariat_box484_ex259a_4_w2SpinningDisc - Red.tif	BOX759
401	1	341.992	559.461	1	1	1	339	556	345	563	26	181221	107774	1	1	401	1330	401	MAX_20210209_lariat_box484_ex259a_4_w2SpinningDisc - Red.tif	BOX759
402	1	341.381	905.917	1	1	1	339	903	344	909	15	33090.6	14306.1	1	1	402	1331	402	MAX_20210209_lariat_box484_ex259a_4_w2SpinningDisc - Red.tif	BOX759
403	1	342.188	528.161	1	1	1	340	525	344	531	11	5966	1781.5	1	0	403	0	403	MAX_20210209_lariat_box484_ex259a_4_w2SpinningDisc - Red.tif	BOX759
404	1	342.486	654.344	1	1	1	340	652	345	657	10	10006.6	2466.4	1	0	404	0	404	MAX_20210209_lariat_box484_ex259a_4_w2SpinningDisc - Red.tif	BOX759
405	1	342.658	663.736	1	1	1	340	661	345	668	14	20846	8198	1	1	405	1333	405	MAX_20210209_lariat_box484_ex259a_4_w2SpinningDisc - Red.tif	BOX759
406	1	341.916	739.195	1	1	1	340	736	344	743	12	12032.6	2781.18	1	0	406	0	406	MAX_20210209_lariat_box484_ex259a_4_w2SpinningDisc - Red.tif	BOX759
407	1	343.302	784.614	1	1	1	340	782	346	787	14	14572.8	4062.36	1	0	407	0	407	MAX_20210209_lariat_box484_ex259a_4_w2SpinningDisc - Red.tif	BOX759
408	1	341.653	853.166	1	1	1	340	851	343	855	5	2735	226.857	1	0	408	0	408	MAX_20210209_lariat_box484_ex259a_4_w2SpinningDisc - Red.tif	BOX759
409	1	342.956	623.629	1	1	1	341	621	345	627	7	5090.25	3608.75	1	0	409	0	409	MAX_20210209_lariat_box484_ex259a_4_w2SpinningDisc - Red.tif	BOX759
410	1	342.787	695.642	1	1	1	341	693	345	699	11	10869.2	3673.5	1	0	410	0	410	MAX_20210209_lariat_box484_ex259a_4_w2SpinningDisc - Red.tif	BOX759
411	1	342.672	757.117	1	1	1	341	755	344	760	6	3419	1181	1	0	411	0	411	MAX_20210209_lariat_box484_ex259a_4_w2SpinningDisc - Red.tif	BOX759
412	1	344.046	801.09	1	1	1	341	798	348	804	15	15905.9	3542.92	1	0	412	0	412	MAX_20210209_lariat_box484_ex259a_4_w2SpinningDisc - Red.tif	BOX759
413	1	343.145	956.312	1	1	1	341	954	345	959	11	9193.67	1864.67	1	0	413	0	413	MAX_20210209_lariat_box484_ex259a_4_w2SpinningDisc - Red.tif	BOX759
414	1	343.377	494.244	1	1	1	342	492	345	497	7	4443	-6	1	0	414	0	414	MAX_20210209_lariat_box484_ex259a_4_w2SpinningDisc - Red.tif	BOX759
415	1	343.693	537.94	1	1	1	342	536	346	540	7	3323.44	164.438	1	0	415	0	415	MAX_20210209_lariat_box484_ex259a_4_w2SpinningDisc - Red.tif	BOX759
416	1	344.295	730.299	1	1	1	342	727	347	734	14	15571	3555	1	1	416	1335	416	MAX_20210209_lariat_box484_ex259a_4_w2SpinningDisc - Red.tif	BOX759
417	1	345.284	410.921	1	1	1	343	409	348	414	11	11068.6	3062.2	1	1	417	1334	417	MAX_20210209_lariat_box484_ex259a_4_w2SpinningDisc - Red.tif	BOX759
418	1	346.243	426.694	1	1	1	343	422	349	432	22	21933.8	13229.3	1	1	418	1336	418	MAX_20210209_lariat_box484_ex259a_4_w2SpinningDisc - Red.tif	BOX759
419	1	344.686	582.65	1	1	1	343	581	346	584	3	1674.33	228.333	1	0	419	0	419	MAX_20210209_lariat_box484_ex259a_4_w2SpinningDisc - Red.tif	BOX759
420	1	344.313	808.633	1	1	1	343	807	346	810	3	955.667	32	1	0	420	0	420	MAX_20210209_lariat_box484_ex259a_4_w2SpinningDisc - Red.tif	BOX759
421	1	344.753	880.647	1	1	1	343	878	347	884	11	8901.25	1927.5	1	0	421	0	421	MAX_20210209_lariat_box484_ex259a_4_w2SpinningDisc - Red.tif	BOX759
422	1	345.308	887.159	1	1	1	343	884	348	890	13	11302.6	5198.36	1	1	422	1337	422	MAX_20210209_lariat_box484_ex259a_4_w2SpinningDisc - Red.tif	BOX759
423	1	344.598	894.362	1	1	1	343	892	347	897	9	7124	2127	1	0	423	0	423	MAX_20210209_lariat_box484_ex259a_4_w2SpinningDisc - Red.tif	BOX759
424	1	346.964	448.831	1	1	1	344	446	350	452	12	16945.5	4953.71	1	1	424	1338	424	MAX_20210209_lariat_box484_ex259a_4_w2SpinningDisc - Red.tif	BOX759
425	1	345.823	588.345	1	1	1	344	586	347	591	5	2895.5	1906	1	0	425	0	425	MAX_20210209_lariat_box484_ex259a_4_w2SpinningDisc - Red.tif	BOX759
426	1	345.93	814.3	1	1	1	344	812	348	817	9	6512.67	658.333	1	0	426	0	426	MAX_20210209_lariat_box484_ex259a_4_w2SpinningDisc - Red.tif	BOX759
427	1	346.33	842.503	1	1	1	345	840	348	845	6	3116	553.5	1	0	427	0	427	MAX_20210209_lariat_box484_ex259a_4_w2SpinningDisc - Red.tif	BOX759
428	1	346.813	855.622	1	1	1	345	850	349	860	18	26276.4	9444	1	1	428	1339	428	MAX_20210209_lariat_box484_ex259a_4_w2SpinningDisc - Red.tif	BOX759
429	1	349.015	416.002	1	1	1	346	414	352	419	13	12484.7	3965.91	1	1	429	1340	429	MAX_20210209_lariat_box484_ex259a_4_w2SpinningDisc - Red.tif	BOX759
430	1	347	942.302	1	1	1	346	940	348	945	4	1856	515.571	1	0	430	0	430	MAX_20210209_lariat_box484_ex259a_4_w2SpinningDisc - Red.tif	BOX759
431	1	350.629	531.7	1	1	1	347	529	354	536	18	20748	8271.29	1	1	431	1344	431	MAX_20210209_lariat_box484_ex259a_4_w2SpinningDisc - Red.tif	BOX759
432	1	349.462	634.869	1	1	1	347	632	352	638	14	12903.4	4311.73	1	1	432	1342	432	MAX_20210209_lariat_box484_ex259a_4_w2SpinningDisc - Red.tif	BOX759
433	1	348.62	643.096	1	1	1	347	640	351	646	10	6992.75	2399.25	1	0	433	0	433	MAX_20210209_lariat_box484_ex259a_4_w2SpinningDisc - Red.tif	BOX759
434	1	349.224	761.593	1	1	1	347	759	351	765	11	9050.25	4574.75	1	1	434	1343	434	MAX_20210209_lariat_box484_ex259a_4_w2SpinningDisc - Red.tif	BOX759
435	1	348.621	976.348	1	1	1	347	974	351	979	9	6394	1428	1	0	435	0	435	MAX_20210209_lariat_box484_ex259a_4_w2SpinningDisc - Red.tif	BOX759
436	1	349.495	510.458	1	1	1	348	509	351	512	4	2310.67	1039.67	1	0	436	0	436	MAX_20210209_lariat_box484_ex259a_4_w2SpinningDisc - Red.tif	BOX759
437	1	350.588	595.407	1	1	1	348	593	353	600	12	20693	15882	1	1	437	1341	437	MAX_20210209_lariat_box484_ex259a_4_w2SpinningDisc - Red.tif	BOX759
438	1	351.623	619.355	1	1	1	348	616	356	623	21	29265.8	8851.4	1	1	438	1350	438	MAX_20210209_lariat_box484_ex259a_4_w2SpinningDisc - Red.tif	BOX759
439	1	350.251	740.157	1	1	1	348	737	353	743	13	15290.9	3377.27	1	1	439	1345	439	MAX_20210209_lariat_box484_ex259a_4_w2SpinningDisc - Red.tif	BOX759
440	1	350.88	553.849	1	1	1	349	552	353	556	6	2140.31	-152.5	1	0	440	0	440	MAX_20210209_lariat_box484_ex259a_4_w2SpinningDisc - Red.tif	BOX759
441	1	350	568.989	1	1	1	349	567	351	571	3	359	102	1	0	441	0	441	MAX_20210209_lariat_box484_ex259a_4_w2SpinningDisc - Red.tif	BOX759
442	1	351.57	719.28	1	1	1	349	717	354	723	13	25343.1	9511.64	1	1	442	1348	442	MAX_20210209_lariat_box484_ex259a_4_w2SpinningDisc - Red.tif	BOX759
443	1	350.53	811.122	1	1	1	349	809	352	814	7	5332.5	2207	1	0	443	0	443	MAX_20210209_lariat_box484_ex259a_4_w2SpinningDisc - Red.tif	BOX759
444	1	352.81	401.71	1	1	1	350	398	357	405	21	60020.7	29549.9	1	1	444	1346	444	MAX_20210209_lariat_box484_ex259a_4_w2SpinningDisc - Red.tif	BOX759
445	1	351.773	408.577	1	1	1	350	407	354	410	5	3603.43	-315.429	1	0	445	0	445	MAX_20210209_lariat_box484_ex259a_4_w2SpinningDisc - Red.tif	BOX759
446	1	351.369	426.783	1	1	1	350	425	353	429	5	2677.71	192.714	1	0	446	0	446	MAX_20210209_lariat_box484_ex259a_4_w2SpinningDisc - Red.tif	BOX759
447	1	352.168	583.509	1	1	1	350	581	355	587	15	28614.9	11337.5	1	1	447	1347	447	MAX_20210209_lariat_box484_ex259a_4_w2SpinningDisc - Red.tif	BOX759
448	1	352.499	701.406	1	1	1	350	699	355	704	12	12637.4	2462.8	1	0	448	0	448	MAX_20210209_lariat_box484_ex259a_4_w2SpinningDisc - Red.tif	BOX759
449	1	351	778.998	1	1	1	350	777	352	781	3	805.5	-109.75	1	0	449	0	449	MAX_20210209_lariat_box484_ex259a_4_w2SpinningDisc - Red.tif	BOX759
450	1	351.83	790.618	1	1	1	350	788	354	793	9	6143.67	708.667	1	0	450	0	450	MAX_20210209_lariat_box484_ex259a_4_w2SpinningDisc - Red.tif	BOX759
451	1	351.961	802.512	1	1	1	350	799	354	806	14	16460.6	7957.36	1	1	451	1349	451	MAX_20210209_lariat_box484_ex259a_4_w2SpinningDisc - Red.tif	BOX759
452	1	351.393	827.731	1	1	1	350	826	353	830	5	2648.43	616.571	1	0	452	0	452	MAX_20210209_lariat_box484_ex259a_4_w2SpinningDisc - Red.tif	BOX759
453	1	353.366	511.855	1	1	1	351	510	355	514	7	8042.31	574	1	0	453	0	453	MAX_20210209_lariat_box484_ex259a_4_w2SpinningDisc - Red.tif	BOX759
454	1	352.693	614.294	1	1	1	351	613	354	616	3	1712.33	174.333	1	0	454	0	454	MAX_20210209_lariat_box484_ex259a_4_w2SpinningDisc - Red.tif	BOX759
455	1	352.88	692.244	1	1	1	351	690	355	695	11	9924.67	3359	1	1	455	1351	455	MAX_20210209_lariat_box484_ex259a_4_w2SpinningDisc - Red.tif	BOX759
456	1	352.3	796.473	1	1	1	351	794	354	799	6	2738	302.5	1	0	456	0	456	MAX_20210209_lariat_box484_ex259a_4_w2SpinningDisc - Red.tif	BOX759
457	1	352.876	985.281	1	1	1	351	983	355	988	9	6187.33	2585.67	1	0	457	0	457	MAX_20210209_lariat_box484_ex259a_4_w2SpinningDisc - Red.tif	BOX759
458	1	354.466	478.585	1	1	1	352	476	357	481	12	9562.4	3460.4	1	1	458	1353	458	MAX_20210209_lariat_box484_ex259a_4_w2SpinningDisc - Red.tif	BOX759
459	1	353.638	753.566	1	1	1	352	751	356	757	10	6963	2549	1	0	459	0	459	MAX_20210209_lariat_box484_ex259a_4_w2SpinningDisc - Red.tif	BOX759
460	1	354.501	833.993	1	1	1	352	832	357	836	8	5563.33	2269.33	1	0	460	0	460	MAX_20210209_lariat_box484_ex259a_4_w2SpinningDisc - Red.tif	BOX759
461	1	353.935	880.851	1	1	1	352	878	356	884	14	18976	7300.5	1	1	461	1352	461	MAX_20210209_lariat_box484_ex259a_4_w2SpinningDisc - Red.tif	BOX759
462	1	354.025	912.01	1	1	1	352	909	356	915	11	8651.25	5304.75	1	1	462	1354	462	MAX_20210209_lariat_box484_ex259a_4_w2SpinningDisc - Red.tif	BOX759
463	1	355.046	650.377	1	1	1	353	645	357	656	23	18382	6029	1	0	463	0	463	MAX_20210209_lariat_box484_ex259a_4_w2SpinningDisc - Red.tif	BOX759
464	1	355.768	920.49	1	1	1	353	917	358	924	16	35309	16460	1	1	464	1355	464	MAX_20210209_lariat_box484_ex259a_4_w2SpinningDisc - Red.tif	BOX759
465	1	355.722	495.595	1	1	1	354	493	358	499	11	11218.8	4592.75	1	1	465	1356	465	MAX_20210209_lariat_box484_ex259a_4_w2SpinningDisc - Red.tif	BOX759
466	1	355.16	737.932	1	1	1	354	736	357	740	4	2342.29	1190.57	1	0	466	0	466	MAX_20210209_lariat_box484_ex259a_4_w2SpinningDisc - Red.tif	BOX759
467	1	356.198	955.572	1	1	1	354	953	359	960	14	28705	12877	1	1	467	1357	467	MAX_20210209_lariat_box484_ex259a_4_w2SpinningDisc - Red.tif	BOX759
468	1	356	452.049	1	1	1	355	450	357	454	3	647.75	-149	1	0	468	0	468	MAX_20210209_lariat_box484_ex259a_4_w2SpinningDisc - Red.tif	BOX759
469	1	357.055	507.904	1	1	1	355	506	359	510	8	5540.5	967.438	1	0	469	0	469	MAX_20210209_lariat_box484_ex259a_4_w2SpinningDisc - Red.tif	BOX759
470	1	357.376	572.337	1	1	1	355	570	359	576	9	7524.25	2189	1	1	470	1358	470	MAX_20210209_lariat_box484_ex259a_4_w2SpinningDisc - Red.tif	BOX759
471	1	356.692	854.231	1	1	1	355	852	358	857	7	2966.5	330	1	0	471	0	471	MAX_20210209_lariat_box484_ex259a_4_w2SpinningDisc - Red.tif	BOX759
472	1	357.856	553.151	1	1	1	356	551	360	555	6	3231.12	293.312	1	0	472	0	472	MAX_20210209_lariat_box484_ex259a_4_w2SpinningDisc - Red.tif	BOX759
473	1	357.605	624.33	1	1	1	356	622	360	627	9	8275	2172.33	1	0	473	0	473	MAX_20210209_lariat_box484_ex259a_4_w2SpinningDisc - Red.tif	BOX759
474	1	357.345	665.805	1	1	1	356	664	359	668	5	1140.43	781	1	0	474	0	474	MAX_20210209_lariat_box484_ex259a_4_w2SpinningDisc - Red.tif	BOX759
475	1	359.514	415.516	1	1	1	358	413	361	418	8	5552	846.5	1	0	475	0	475	MAX_20210209_lariat_box484_ex259a_4_w2SpinningDisc - Red.tif	BOX759
476	1	359.539	524.488	1	1	1	358	523	361	526	4	1731.33	-284.333	1	0	476	0	476	MAX_20210209_lariat_box484_ex259a_4_w2SpinningDisc - Red.tif	BOX759
477	1	359.556	602.281	1	1	1	358	599	361	605	9	4267.11	1460.11	1	0	477	0	477	MAX_20210209_lariat_box484_ex259a_4_w2SpinningDisc - Red.tif	BOX759
478	1	359.645	706.509	1	1	1	358	704	361	709	6	4250.5	408.5	1	0	478	0	478	MAX_20210209_lariat_box484_ex259a_4_w2SpinningDisc - Red.tif	BOX759
479	1	359.659	783.439	1	1	1	358	781	362	786	9	5825	2029	1	0	479	0	479	MAX_20210209_lariat_box484_ex259a_4_w2SpinningDisc - Red.tif	BOX759
480	1	359.392	840.695	1	1	1	358	838	361	843	7	3594	363.5	1	0	480	0	480	MAX_20210209_lariat_box484_ex259a_4_w2SpinningDisc - Red.tif	BOX759
481	1	359.775	865.083	1	1	1	358	863	362	868	8	5692.33	798.667	1	0	481	0	481	MAX_20210209_lariat_box484_ex259a_4_w2SpinningDisc - Red.tif	BOX759
482	1	360.286	945.586	1	1	1	358	943	362	949	10	8006.75	2541	1	0	482	0	482	MAX_20210209_lariat_box484_ex259a_4_w2SpinningDisc - Red.tif	BOX759
483	1	360.496	544.886	1	1	1	359	542	362	548	8	4609.78	1600	1	0	483	0	483	MAX_20210209_lariat_box484_ex259a_4_w2SpinningDisc - Red.tif	BOX759
484	1	361.63	560.652	1	1	1	359	558	364	564	13	18608.5	5788.18	1	1	484	1359	484	MAX_20210209_lariat_box484_ex259a_4_w2SpinningDisc - Red.tif	BOX759
485	1	362.286	681.082	1	1	1	359	678	365	685	16	33760.8	13884.8	1	1	485	1360	485	MAX_20210209_lariat_box484_ex259a_4_w2SpinningDisc - Red.tif	BOX759
486	1	361.393	850.366	1	1	1	359	847	363	854	13	15094	7692.64	1	1	486	1361	486	MAX_20210209_lariat_box484_ex259a_4_w2SpinningDisc - Red.tif	BOX759
487	1	361.59	883.997	1	1	1	359	881	364	887	13	11947.8	3517.64	1	0	487	0	487	MAX_20210209_lariat_box484_ex259a_4_w2SpinningDisc - Red.tif	BOX759
488	1	361.604	897.342	1	1	1	359	894	364	901	17	24886	12576	1	1	488	1362	488	MAX_20210209_lariat_box484_ex259a_4_w2SpinningDisc - Red.tif	BOX759
489	1	362.223	428.196	1	1	1	360	426	364	430	8	4925.81	255.562	1	0	489	0	489	MAX_20210209_lariat_box484_ex259a_4_w2SpinningDisc - Red.tif	BOX759
490	1	362.096	451.823	1	1	1	360	450	364	454	8	5413.12	542.938	1	0	490	0	490	MAX_20210209_lariat_box484_ex259a_4_w2SpinningDisc - Red.tif	BOX759
491	1	362.152	618.66	1	1	1	360	616	364	621	9	5567.33	1867.33	1	0	491	0	491	MAX_20210209_lariat_box484_ex259a_4_w2SpinningDisc - Red.tif	BOX759
492	1	362.87	387.608	1	1	1	361	385	365	390	9	5246	2612	1	1	492	1363	492	MAX_20210209_lariat_box484_ex259a_4_w2SpinningDisc - Red.tif	BOX759
493	1	363.344	403.306	1	1	1	361	401	366	406	13	19099.6	7319.6	1	1	493	1364	493	MAX_20210209_lariat_box484_ex259a_4_w2SpinningDisc - Red.tif	BOX759
494	1	363.798	442.105	1	1	1	361	440	366	445	11	11057	1944.4	1	0	494	0	494	MAX_20210209_lariat_box484_ex259a_4_w2SpinningDisc - Red.tif	BOX759
495	1	362.99	645.408	1	1	1	361	642	365	649	14	20161.9	8031.09	1	1	495	1365	495	MAX_20210209_lariat_box484_ex259a_4_w2SpinningDisc - Red.tif	BOX759
496	1	363.146	760.847	1	1	1	361	759	365	763	8	4558.25	336.938	1	0	496	0	496	MAX_20210209_lariat_box484_ex259a_4_w2SpinningDisc - Red.tif	BOX759
497	1	363.428	817.504	1	1	1	361	814	366	823	18	23298.7	9982	1	1	497	1366	497	MAX_20210209_lariat_box484_ex259a_4_w2SpinningDisc - Red.tif	BOX759
498	1	364.401	718.643	1	1	1	362	716	367	722	13	19188.6	5309.09	1	1	498	1368	498	MAX_20210209_lariat_box484_ex259a_4_w2SpinningDisc - Red.tif	BOX759
499	1	363.594	808.942	1	1	1	362	806	365	812	8	6545.89	1851.44	1	0	499	0	499	MAX_20210209_lariat_box484_ex259a_4_w2SpinningDisc - Red.tif	BOX759
500	1	364.528	914.211	1	1	1	362	912	367	917	14	16460.4	5727	1	1	500	1370	500	MAX_20210209_lariat_box484_ex259a_4_w2SpinningDisc - Red.tif	BOX759
501	1	365.531	462.143	1	1	1	363	459	368	466	15	31840	12514	1	1	501	1367	501	MAX_20210209_lariat_box484_ex259a_4_w2SpinningDisc - Red.tif	BOX759
502	1	365.875	476.81	1	1	1	363	474	369	481	15	33681.3	15635.8	1	1	502	1371	502	MAX_20210209_lariat_box484_ex259a_4_w2SpinningDisc - Red.tif	BOX759
503	1	365.013	488.143	1	1	1	363	486	367	491	10	12478	3064.67	1	1	503	1372	503	MAX_20210209_lariat_box484_ex259a_4_w2SpinningDisc - Red.tif	BOX759
504	1	364.908	875.754	1	1	1	363	873	367	879	12	13188.5	4965.75	1	1	504	1369	504	MAX_20210209_lariat_box484_ex259a_4_w2SpinningDisc - Red.tif	BOX759
505	1	364.462	951.898	1	1	1	363	950	366	954	6	3737.29	1103.57	1	0	505	0	505	MAX_20210209_lariat_box484_ex259a_4_w2SpinningDisc - Red.tif	BOX759
506	1	366.605	421.556	1	1	1	364	419	369	425	13	20092.8	6509.18	1	1	506	1374	506	MAX_20210209_lariat_box484_ex259a_4_w2SpinningDisc - Red.tif	BOX759
507	1	366.519	697.917	1	1	1	364	695	369	701	14	16529.8	4550.55	1	1	507	1375	507	MAX_20210209_lariat_box484_ex259a_4_w2SpinningDisc - Red.tif	BOX759
508	1	366.671	853.551	1	1	1	364	851	369	857	12	21025.5	8181	1	1	508	1377	508	MAX_20210209_lariat_box484_ex259a_4_w2SpinningDisc - Red.tif	BOX759
509	1	365.461	930.469	1	1	1	364	929	367	932	4	1555.67	172	1	0	509	0	509	MAX_20210209_lariat_box484_ex259a_4_w2SpinningDisc - Red.tif	BOX759
510	1	367.885	409.725	1	1	1	365	407	371	413	16	38224.9	15240.8	1	1	510	1373	510	MAX_20210209_lariat_box484_ex259a_4_w2SpinningDisc - Red.tif	BOX759
511	1	367.279	432.205	1	1	1	365	430	369	435	8	5354.67	1204	1	0	511	0	511	MAX_20210209_lariat_box484_ex259a_4_w2SpinningDisc - Red.tif	BOX759
512	1	367.646	622.549	1	1	1	365	620	370	626	12	14011.5	3655.55	1	0	512	0	512	MAX_20210209_lariat_box484_ex259a_4_w2SpinningDisc - Red.tif	BOX759
513	1	367.365	843.562	1	1	1	365	838	370	848	24	36494.4	13090.2	1	1	513	1376	513	MAX_20210209_lariat_box484_ex259a_4_w2SpinningDisc - Red.tif	BOX759
514	1	367.276	862.531	1	1	1	365	860	370	866	13	14371.4	5255.64	1	1	514	1378	514	MAX_20210209_lariat_box484_ex259a_4_w2SpinningDisc - Red.tif	BOX759
515	1	366	944.96	1	1	1	365	943	367	947	3	1332	304.75	1	0	515	0	515	MAX_20210209_lariat_box484_ex259a_4_w2SpinningDisc - Red.tif	BOX759
516	1	367.495	470.963	1	1	1	366	469	369	473	6	2802.86	246.429	1	0	516	0	516	MAX_20210209_lariat_box484_ex259a_4_w2SpinningDisc - Red.tif	BOX759
517	1	369.002	641.532	1	1	1	366	639	372	645	16	23670.2	7827.75	1	1	517	1380	517	MAX_20210209_lariat_box484_ex259a_4_w2SpinningDisc - Red.tif	BOX759
518	1	367.766	774.385	1	1	1	366	773	370	776	5	2617.71	477.714	1	0	518	0	518	MAX_20210209_lariat_box484_ex259a_4_w2SpinningDisc - Red.tif	BOX759
519	1	367.272	783.319	1	1	1	366	782	369	785	3	1311	-318	1	0	519	0	519	MAX_20210209_lariat_box484_ex259a_4_w2SpinningDisc - Red.tif	BOX759
520	1	367.839	811.556	1	1	1	366	809	370	814	7	6294	236.667	1	0	520	0	520	MAX_20210209_lariat_box484_ex259a_4_w2SpinningDisc - Red.tif	BOX759
521	1	369.471	559.994	1	1	1	367	557	372	563	16	21521.7	7994.82	1	1	521	1379	521	MAX_20210209_lariat_box484_ex259a_4_w2SpinningDisc - Red.tif	BOX759
522	1	371.494	592.344	1	1	1	367	589	376	596	23	32300	9206	1	1	522	1395	522	MAX_20210209_lariat_box484_ex259a_4_w2SpinningDisc - Red.tif	BOX759
523	1	368.564	605.741	1	1	1	367	604	370	608	5	1206.14	53.1429	1	0	523	0	523	MAX_20210209_lariat_box484_ex259a_4_w2SpinningDisc - Red.tif	BOX759
524	1	368.764	676.016	1	1	1	367	673	371	679	11	9973	3173.75	1	1	524	1382	524	MAX_20210209_lariat_box484_ex259a_4_w2SpinningDisc - Red.tif	BOX759
525	1	368.439	749.123	1	1	1	367	747	370	752	7	4139.5	317.5	1	0	525	0	525	MAX_20210209_lariat_box484_ex259a_4_w2SpinningDisc - Red.tif	BOX759
526	1	368.477	920.933	1	1	1	367	918	370	924	10	7283.22	1969.78	1	0	526	0	526	MAX_20210209_lariat_box484_ex259a_4_w2SpinningDisc - Red.tif	BOX759
527	1	370.071	664.512	1	1	1	368	662	373	668	13	18118.1	3844	1	1	527	1383	527	MAX_20210209_lariat_box484_ex259a_4_w2SpinningDisc - Red.tif	BOX759
528	1	370.275	823.311	1	1	1	368	820	373	827	14	20982	6540	1	1	528	1384	528	MAX_20210209_lariat_box484_ex259a_4_w2SpinningDisc - Red.tif	BOX759
529	1	371.468	439.516	1	1	1	369	437	374	443	12	17873.7	4703.09	1	1	529	1385	529	MAX_20210209_lariat_box484_ex259a_4_w2SpinningDisc - Red.tif	BOX759
530	1	370.471	738.921	1	1	1	369	737	372	741	6	2533	1040.71	1	0	530	0	530	MAX_20210209_lariat_box484_ex259a_4_w2SpinningDisc - Red.tif	BOX759
531	1	371.088	901.962	1	1	1	369	896	373	907	18	14238	2876	1	0	531	0	531	MAX_20210209_lariat_box484_ex259a_4_w2SpinningDisc - Red.tif	BOX759
532	1	371.211	977.599	1	1	1	369	975	374	982	14	17664	5625	1	1	532	1387	532	MAX_20210209_lariat_box484_ex259a_4_w2SpinningDisc - Red.tif	BOX759
533	1	371.252	361.636	1	1	1	370	360	373	363	3	1726	296.667	1	0	533	0	533	MAX_20210209_lariat_box484_ex259a_4_w2SpinningDisc - Red.tif	BOX759
534	1	372.826	513.335	1	1	1	370	511	375	516	10	15118.6	2852.2	1	1	534	1388	534	MAX_20210209_lariat_box484_ex259a_4_w2SpinningDisc - Red.tif	BOX759
535	1	372.274	766.014	1	1	1	370	763	375	770	16	22456	8640	1	1	535	1386	535	MAX_20210209_lariat_box484_ex259a_4_w2SpinningDisc - Red.tif	BOX759
536	1	371.522	794.461	1	1	1	370	793	373	796	4	1685.33	494	1	0	536	0	536	MAX_20210209_lariat_box484_ex259a_4_w2SpinningDisc - Red.tif	BOX759
537	1	372.711	837.921	1	1	1	370	833	375	842	16	28088.3	11181.6	1	1	537	1389	537	MAX_20210209_lariat_box484_ex259a_4_w2SpinningDisc - Red.tif	BOX759
538	1	373.535	389.188	1	1	1	371	387	376	392	14	12775.8	3745.6	1	1	538	1391	538	MAX_20210209_lariat_box484_ex259a_4_w2SpinningDisc - Red.tif	BOX759
539	1	373.179	532.17	1	1	1	371	530	376	536	11	15659.2	5394.45	1	1	539	1393	539	MAX_20210209_lariat_box484_ex259a_4_w2SpinningDisc - Red.tif	BOX759
540	1	373.442	584.652	1	1	1	371	582	376	588	13	21374.7	7675.45	1	1	540	1394	540	MAX_20210209_lariat_box484_ex259a_4_w2SpinningDisc - Red.tif	BOX759
541	1	372.962	864.173	1	1	1	371	862	375	867	6	4481.67	1392	1	0	541	0	541	MAX_20210209_lariat_box484_ex259a_4_w2SpinningDisc - Red.tif	BOX759
542	1	373.694	908.556	1	1	1	371	906	376	912	12	15038	7930.27	1	1	542	1396	542	MAX_20210209_lariat_box484_ex259a_4_w2SpinningDisc - Red.tif	BOX759
543	1	374.219	347.108	1	1	1	372	344	377	350	13	15900.6	11262.4	1	1	543	1390	543	MAX_20210209_lariat_box484_ex259a_4_w2SpinningDisc - Red.tif	BOX759
544	1	374.468	366.488	1	1	1	372	365	377	368	6	2370	318	1	0	544	0	544	MAX_20210209_lariat_box484_ex259a_4_w2SpinningDisc - Red.tif	BOX759
545	1	374.004	375.848	1	1	1	372	373	376	379	10	9441.5	3573	1	0	545	0	545	MAX_20210209_lariat_box484_ex259a_4_w2SpinningDisc - Red.tif	BOX759
546	1	374.536	426.483	1	1	1	372	424	377	430	12	21143.1	6947.64	1	1	546	1397	546	MAX_20210209_lariat_box484_ex259a_4_w2SpinningDisc - Red.tif	BOX759
547	1	374.28	519.075	1	1	1	372	516	377	523	13	25070	8344	1	1	547	1392	547	MAX_20210209_lariat_box484_ex259a_4_w2SpinningDisc - Red.tif	BOX759
548	1	374.893	547.925	1	1	1	372	545	377	552	12	18054	8117	1	1	548	1398	548	MAX_20210209_lariat_box484_ex259a_4_w2SpinningDisc - Red.tif	BOX759
549	1	373.42	674.446	1	1	1	372	673	375	676	4	1560	-41	1	0	549	0	549	MAX_20210209_lariat_box484_ex259a_4_w2SpinningDisc - Red.tif	BOX759
550	1	374.493	715.237	1	1	1	372	713	377	718	10	10952.4	2583.6	1	0	550	0	550	MAX_20210209_lariat_box484_ex259a_4_w2SpinningDisc - Red.tif	BOX759
551	1	376.01	415.028	1	1	1	373	412	379	418	13	18985.4	6191.92	1	1	551	1401	551	MAX_20210209_lariat_box484_ex259a_4_w2SpinningDisc - Red.tif	BOX759
552	1	375.852	456.3	1	1	1	373	453	379	460	19	49681.5	21696.6	1	1	552	1402	552	MAX_20210209_lariat_box484_ex259a_4_w2SpinningDisc - Red.tif	BOX759
553	1	374.775	471.175	1	1	1	373	469	377	474	8	6101	1140.67	1	0	553	0	553	MAX_20210209_lariat_box484_ex259a_4_w2SpinningDisc - Red.tif	BOX759
554	1	375.012	485.927	1	1	1	373	484	377	488	9	7390.81	826.312	1	0	554	0	554	MAX_20210209_lariat_box484_ex259a_4_w2SpinningDisc - Red.tif	BOX759
555	1	375.623	625.861	1	1	1	373	624	378	628	9	5488.67	1460.33	1	0	555	0	555	MAX_20210209_lariat_box484_ex259a_4_w2SpinningDisc - Red.tif	BOX759
556	1	374.519	726.962	1	1	1	373	725	376	729	6	2224.14	-211.286	1	0	556	0	556	MAX_20210209_lariat_box484_ex259a_4_w2SpinningDisc - Red.tif	BOX759
557	1	374.944	777.797	1	1	1	373	775	377	781	10	11080	7726.75	1	1	557	1399	557	MAX_20210209_lariat_box484_ex259a_4_w2SpinningDisc - Red.tif	BOX759
558	1	375.54	783.352	1	1	1	373	781	378	787	12	14355.2	5026.55	1	1	558	1404	558	MAX_20210209_lariat_box484_ex259a_4_w2SpinningDisc - Red.tif	BOX759
559	1	376.61	327.285	1	1	1	374	325	379	330	13	16255.6	8839.8	1	1	559	1406	559	MAX_20210209_lariat_box484_ex259a_4_w2SpinningDisc - Red.tif	BOX759
560	1	376.385	340.106	1	1	1	374	337	379	343	15	26441.6	8939.27	1	1	560	1400	560	MAX_20210209_lariat_box484_ex259a_4_w2SpinningDisc - Red.tif	BOX759
561	1	376.434	447.448	1	1	1	374	445	379	450	12	15454.4	4768	1	1	561	1407	561	MAX_20210209_lariat_box484_ex259a_4_w2SpinningDisc - Red.tif	BOX759
562	1	376.747	495.261	1	1	1	374	493	379	498	10	9345.4	1414.4	1	0	562	0	562	MAX_20210209_lariat_box484_ex259a_4_w2SpinningDisc - Red.tif	BOX759
563	1	377.055	508.335	1	1	1	374	506	380	511	13	15581.5	4590	1	1	563	1408	563	MAX_20210209_lariat_box484_ex259a_4_w2SpinningDisc - Red.tif	BOX759
564	1	375.825	704.287	1	1	1	374	702	378	707	11	10150	2894	1	0	564	0	564	MAX_20210209_lariat_box484_ex259a_4_w2SpinningDisc - Red.tif	BOX759
565	1	376.418	740.081	1	1	1	374	737	379	744	15	26419	11974	1	1	565	1403	565	MAX_20210209_lariat_box484_ex259a_4_w2SpinningDisc - Red.tif	BOX759
566	1	375.831	747.18	1	1	1	374	744	378	750	12	9957.25	3350.75	1	0	566	0	566	MAX_20210209_lariat_box484_ex259a_4_w2SpinningDisc - Red.tif	BOX759
567	1	376.059	871.98	1	1	1	374	869	378	875	11	10570.2	3286.5	1	0	567	0	567	MAX_20210209_lariat_box484_ex259a_4_w2SpinningDisc - Red.tif	BOX759
568	1	375.298	885.645	1	1	1	374	884	377	887	3	1820.33	369	1	0	568	0	568	MAX_20210209_lariat_box484_ex259a_4_w2SpinningDisc - Red.tif	BOX759
569	1	376.355	891.445	1	1	1	374	888	379	895	16	22201	9961	1	1	569	1405	569	MAX_20210209_lariat_box484_ex259a_4_w2SpinningDisc - Red.tif	BOX759
570	1	377.775	378.181	1	1	1	375	376	380	381	11	16050.2	5748	1	1	570	1409	570	MAX_20210209_lariat_box484_ex259a_4_w2SpinningDisc - Red.tif	BOX759
571	1	377.914	754.703	1	1	1	375	752	381	758	16	34461	17760.8	1	1	571	1410	571	MAX_20210209_lariat_box484_ex259a_4_w2SpinningDisc - Red.tif	BOX759
572	1	376	899.925	1	1	1	375	898	377	902	3	1413	-35.75	1	0	572	0	572	MAX_20210209_lariat_box484_ex259a_4_w2SpinningDisc - Red.tif	BOX759
573	1	377.784	423.312	1	1	1	376	421	380	426	9	11327.7	2424.33	1	0	573	0	573	MAX_20210209_lariat_box484_ex259a_4_w2SpinningDisc - Red.tif	BOX759
574	1	378.763	533.273	1	1	1	376	531	381	537	12	19440.6	8222.82	1	1	574	1411	574	MAX_20210209_lariat_box484_ex259a_4_w2SpinningDisc - Red.tif	BOX759
575	1	378.53	659.678	1	1	1	376	657	381	663	14	19187.1	6814.36	1	1	575	1412	575	MAX_20210209_lariat_box484_ex259a_4_w2SpinningDisc - Red.tif	BOX759
576	1	377.506	794.551	1	1	1	376	793	379	796	4	2076	-30	1	0	576	0	576	MAX_20210209_lariat_box484_ex259a_4_w2SpinningDisc - Red.tif	BOX759
577	1	377	920.988	1	1	1	376	919	378	923	3	798.25	-61.25	1	0	577	0	577	MAX_20210209_lariat_box484_ex259a_4_w2SpinningDisc - Red.tif	BOX759
578	1	378.515	354.929	1	1	1	377	353	380	357	6	4043.57	698.429	1	0	578	0	578	MAX_20210209_lariat_box484_ex259a_4_w2SpinningDisc - Red.tif	BOX759
579	1	379.265	474.547	1	1	1	377	472	381	477	8	6502.67	1772	1	0	579	0	579	MAX_20210209_lariat_box484_ex259a_4_w2SpinningDisc - Red.tif	BOX759
580	1	378.789	522.127	1	1	1	377	520	381	524	6	5445.81	0.125	1	0	580	0	580	MAX_20210209_lariat_box484_ex259a_4_w2SpinningDisc - Red.tif	BOX759
581	1	379.708	572.255	1	1	1	377	570	382	575	10	9883	2800.4	1	0	581	0	581	MAX_20210209_lariat_box484_ex259a_4_w2SpinningDisc - Red.tif	BOX759
582	1	379.496	798.985	1	1	1	377	796	382	802	16	25021.2	10240.5	1	1	582	1413	582	MAX_20210209_lariat_box484_ex259a_4_w2SpinningDisc - Red.tif	BOX759
583	1	380.974	313.959	1	1	1	378	312	384	316	11	13520	6232.5	1	1	583	1415	583	MAX_20210209_lariat_box484_ex259a_4_w2SpinningDisc - Red.tif	BOX759
584	1	380.326	318.747	1	1	1	378	316	383	322	14	21902.2	11166.1	1	1	584	1414	584	MAX_20210209_lariat_box484_ex259a_4_w2SpinningDisc - Red.tif	BOX759
585	1	380.517	383.471	1	1	1	378	381	383	387	12	21494.3	7421.09	1	1	585	1416	585	MAX_20210209_lariat_box484_ex259a_4_w2SpinningDisc - Red.tif	BOX759
586	1	379.608	633.492	1	1	1	378	631	382	636	9	4608.67	1391.33	1	0	586	0	586	MAX_20210209_lariat_box484_ex259a_4_w2SpinningDisc - Red.tif	BOX759
587	1	379.528	687.874	1	1	1	378	686	381	690	6	3616.57	986.429	1	0	587	0	587	MAX_20210209_lariat_box484_ex259a_4_w2SpinningDisc - Red.tif	BOX759
588	1	380.38	709.226	1	1	1	378	707	383	712	11	11536.2	2764.4	1	0	588	0	588	MAX_20210209_lariat_box484_ex259a_4_w2SpinningDisc - Red.tif	BOX759
589	1	380.242	734.859	1	1	1	378	732	382	738	10	9590	1370.5	1	0	589	0	589	MAX_20210209_lariat_box484_ex259a_4_w2SpinningDisc - Red.tif	BOX759
590	1	380.855	827.946	1	1	1	378	825	383	831	12	23250.5	10281.2	1	1	590	1417	590	MAX_20210209_lariat_box484_ex259a_4_w2SpinningDisc - Red.tif	BOX759
591	1	380.66	877.339	1	1	1	378	875	383	880	13	14202	6488.8	1	1	591	1418	591	MAX_20210209_lariat_box484_ex259a_4_w2SpinningDisc - Red.tif	BOX759
592	1	381.658	304.845	1	1	1	379	303	384	307	9	8878.67	2195.67	1	0	592	0	592	MAX_20210209_lariat_box484_ex259a_4_w2SpinningDisc - Red.tif	BOX759
593	1	380.458	629.408	1	1	1	379	628	382	631	4	1139.67	133.333	1	0	593	0	593	MAX_20210209_lariat_box484_ex259a_4_w2SpinningDisc - Red.tif	BOX759
594	1	382.013	347.485	1	1	1	380	343	385	350	8	8315	12518	1	1	594	1421	594	MAX_20210209_lariat_box484_ex259a_4_w2SpinningDisc - Red.tif	BOX759
595	1	382.604	361.407	1	1	1	380	359	385	364	12	26943.8	7021.4	1	1	595	1422	595	MAX_20210209_lariat_box484_ex259a_4_w2SpinningDisc - Red.tif	BOX759
596	1	382.533	372.386	1	1	1	380	370	385	375	12	22501.2	7791.2	1	1	596	1419	596	MAX_20210209_lariat_box484_ex259a_4_w2SpinningDisc - Red.tif	BOX759
597	1	381.711	580.992	1	1	1	380	579	384	583	7	4385.56	1763.44	1	0	597	0	597	MAX_20210209_lariat_box484_ex259a_4_w2SpinningDisc - Red.tif	BOX759
598	1	382.066	806.286	1	1	1	380	804	385	809	12	12638.4	4690.6	1	1	598	1420	598	MAX_20210209_lariat_box484_ex259a_4_w2SpinningDisc - Red.tif	BOX759
599	1	382.685	815.715	1	1	1	380	811	385	820	21	25767.6	9687.86	1	1	599	1423	599	MAX_20210209_lariat_box484_ex259a_4_w2SpinningDisc - Red.tif	BOX759
600	1	382.397	854.725	1	1	1	380	852	385	858	13	12815.1	4765.18	1	1	600	1424	600	MAX_20210209_lariat_box484_ex259a_4_w2SpinningDisc - Red.tif	BOX759
601	1	382.39	326.202	1	1	1	381	324	384	329	7	4750	1216.5	1	0	601	0	601	MAX_20210209_lariat_box484_ex259a_4_w2SpinningDisc - Red.tif	BOX759
602	1	383.044	618.166	1	1	1	381	616	385	621	10	6978.67	3430	1	1	602	1426	602	MAX_20210209_lariat_box484_ex259a_4_w2SpinningDisc - Red.tif	BOX759
603	1	382.666	780.46	1	1	1	381	778	384	783	6	4113	1010.5	1	0	603	0	603	MAX_20210209_lariat_box484_ex259a_4_w2SpinningDisc - Red.tif	BOX759
604	1	383.329	556.508	1	1	1	382	554	385	559	6	2758	84	1	0	604	0	604	MAX_20210209_lariat_box484_ex259a_4_w2SpinningDisc - Red.tif	BOX759
605	1	383.73	596.749	1	1	1	382	594	386	600	11	9575.25	4023.25	1	1	605	1425	605	MAX_20210209_lariat_box484_ex259a_4_w2SpinningDisc - Red.tif	BOX759
606	1	384.22	746.388	1	1	1	382	744	386	749	10	5781	1303	1	0	606	0	606	MAX_20210209_lariat_box484_ex259a_4_w2SpinningDisc - Red.tif	BOX759
607	1	386.112	439.781	1	1	1	383	438	389	442	10	9031.75	1541	1	0	607	0	607	MAX_20210209_lariat_box484_ex259a_4_w2SpinningDisc - Red.tif	BOX759
608	1	385.353	503.039	1	1	1	383	500	388	506	12	9821.82	1455.82	1	0	608	0	608	MAX_20210209_lariat_box484_ex259a_4_w2SpinningDisc - Red.tif	BOX759
609	1	385.088	513.566	1	1	1	383	511	387	516	9	7688	877.333	1	0	609	0	609	MAX_20210209_lariat_box484_ex259a_4_w2SpinningDisc - Red.tif	BOX759
610	1	386.116	572.492	1	1	1	383	570	389	577	16	51250.1	21487.8	1	1	610	1427	610	MAX_20210209_lariat_box484_ex259a_4_w2SpinningDisc - Red.tif	BOX759
611	1	384	690.89	1	1	1	383	689	385	693	3	1571.5	332.5	1	0	611	0	611	MAX_20210209_lariat_box484_ex259a_4_w2SpinningDisc - Red.tif	BOX759
612	1	384.435	786.951	1	1	1	383	785	386	789	6	3541.57	16.4286	1	0	612	0	612	MAX_20210209_lariat_box484_ex259a_4_w2SpinningDisc - Red.tif	BOX759
613	1	386.556	299.553	1	1	1	384	297	389	302	12	10753.6	3577.8	1	1	613	1428	613	MAX_20210209_lariat_box484_ex259a_4_w2SpinningDisc - Red.tif	BOX759
614	1	386.347	354.361	1	1	1	384	352	389	357	11	12002.6	2587.8	1	0	614	0	614	MAX_20210209_lariat_box484_ex259a_4_w2SpinningDisc - Red.tif	BOX759
615	1	386.915	447.979	1	1	1	384	445	389	451	12	20024.9	6208.55	1	1	615	1429	615	MAX_20210209_lariat_box484_ex259a_4_w2SpinningDisc - Red.tif	BOX759
616	1	386.321	473.908	1	1	1	384	471	389	478	15	23070	7523	1	1	616	1430	616	MAX_20210209_lariat_box484_ex259a_4_w2SpinningDisc - Red.tif	BOX759
617	1	385.888	636.574	1	1	1	384	634	388	640	10	9394.5	3813	1	1	617	1431	617	MAX_20210209_lariat_box484_ex259a_4_w2SpinningDisc - Red.tif	BOX759
618	1	385.975	861.104	1	1	1	384	859	388	864	10	7118.67	1608.67	1	0	618	0	618	MAX_20210209_lariat_box484_ex259a_4_w2SpinningDisc - Red.tif	BOX759
619	1	386.813	392.595	1	1	1	385	389	389	396	13	10741.1	3748.18	1	0	619	0	619	MAX_20210209_lariat_box484_ex259a_4_w2SpinningDisc - Red.tif	BOX759
620	1	387.552	419.538	1	1	1	385	416	390	424	17	16084.5	4811.46	1	0	620	0	620	MAX_20210209_lariat_box484_ex259a_4_w2SpinningDisc - Red.tif	BOX759
621	1	388.176	664.463	1	1	1	385	662	391	669	15	31560.9	14011.9	1	1	621	1433	621	MAX_20210209_lariat_box484_ex259a_4_w2SpinningDisc - Red.tif	BOX759
622	1	388.209	315.734	1	1	1	386	313	390	318	9	7248	3368	1	1	622	1432	622	MAX_20210209_lariat_box484_ex259a_4_w2SpinningDisc - Red.tif	BOX759
623	1	387.961	371.146	1	1	1	386	369	390	374	10	11687.7	3784.33	1	1	623	1435	623	MAX_20210209_lariat_box484_ex259a_4_w2SpinningDisc - Red.tif	BOX759
624	1	388.887	647.494	1	1	1	386	645	391	651	14	19613.4	4210.91	1	1	624	1439	624	MAX_20210209_lariat_box484_ex259a_4_w2SpinningDisc - Red.tif	BOX759
625	1	388.366	679.893	1	1	1	386	677	391	684	15	25631	9223	1	1	625	1436	625	MAX_20210209_lariat_box484_ex259a_4_w2SpinningDisc - Red.tif	BOX759
626	1	387.884	699.97	1	1	1	386	697	390	703	11	8701	1620.25	1	0	626	0	626	MAX_20210209_lariat_box484_ex259a_4_w2SpinningDisc - Red.tif	BOX759
627	1	387.851	718.806	1	1	1	386	716	390	722	12	15614.8	5639.5	1	1	627	1434	627	MAX_20210209_lariat_box484_ex259a_4_w2SpinningDisc - Red.tif	BOX759
628	1	390.682	756.745	1	1	1	386	754	394	760	18	41487	9715.75	1	1	628	1443	628	MAX_20210209_lariat_box484_ex259a_4_w2SpinningDisc - Red.tif	BOX759
629	1	389.587	305.273	1	1	1	387	303	392	309	13	17055.9	6617.18	1	1	629	1438	629	MAX_20210209_lariat_box484_ex259a_4_w2SpinningDisc - Red.tif	BOX759
630	1	389.27	591.172	1	1	1	387	589	391	594	8	6289.33	1674	1	0	630	0	630	MAX_20210209_lariat_box484_ex259a_4_w2SpinningDisc - Red.tif	BOX759
631	1	388.979	691.603	1	1	1	387	689	391	695	13	15610.8	6161.25	1	1	631	1437	631	MAX_20210209_lariat_box484_ex259a_4_w2SpinningDisc - Red.tif	BOX759
632	1	388.707	727.475	1	1	1	387	725	391	730	10	8392	1561.67	1	0	632	0	632	MAX_20210209_lariat_box484_ex259a_4_w2SpinningDisc - Red.tif	BOX759
633	1	390.28	426.838	1	1	1	388	424	393	430	11	12679.1	4097.82	1	1	633	1440	633	MAX_20210209_lariat_box484_ex259a_4_w2SpinningDisc - Red.tif	BOX759
634	1	390.005	460.878	1	1	1	388	458	392	464	11	13036	3398.25	1	1	634	1441	634	MAX_20210209_lariat_box484_ex259a_4_w2SpinningDisc - Red.tif	BOX759
635	1	390.583	709.521	1	1	1	388	707	393	713	12	19194.8	7286.91	1	1	635	1442	635	MAX_20210209_lariat_box484_ex259a_4_w2SpinningDisc - Red.tif	BOX759
636	1	389.473	773.483	1	1	1	388	772	391	775	4	1279	-106.333	1	0	636	0	636	MAX_20210209_lariat_box484_ex259a_4_w2SpinningDisc - Red.tif	BOX759
637	1	391.473	333.441	1	1	1	389	331	394	336	12	14049.8	5308.8	1	1	637	1444	637	MAX_20210209_lariat_box484_ex259a_4_w2SpinningDisc - Red.tif	BOX759
638	1	390.855	557.016	1	1	1	389	555	393	560	9	7104	1685	1	0	638	0	638	MAX_20210209_lariat_box484_ex259a_4_w2SpinningDisc - Red.tif	BOX759
639	1	392.359	357.45	1	1	1	390	355	395	360	11	8096.4	1554.2	1	0	639	0	639	MAX_20210209_lariat_box484_ex259a_4_w2SpinningDisc - Red.tif	BOX759
640	1	392.262	388.767	1	1	1	390	386	395	392	14	20651.5	9232	1	1	640	1445	640	MAX_20210209_lariat_box484_ex259a_4_w2SpinningDisc - Red.tif	BOX759
641	1	393.232	403.139	1	1	1	390	400	396	406	15	23223.8	9340.38	1	1	641	1446	641	MAX_20210209_lariat_box484_ex259a_4_w2SpinningDisc - Red.tif	BOX759
642	1	391.951	574.176	1	1	1	390	572	394	577	10	12300	3017.33	1	0	642	0	642	MAX_20210209_lariat_box484_ex259a_4_w2SpinningDisc - Red.tif	BOX759
643	1	392.596	640.972	1	1	1	390	638	395	644	15	21577.9	6427.82	1	1	643	1447	643	MAX_20210209_lariat_box484_ex259a_4_w2SpinningDisc - Red.tif	BOX759
644	1	392.86	290.106	1	1	1	391	288	395	292	6	3297.81	1260.69	1	0	644	0	644	MAX_20210209_lariat_box484_ex259a_4_w2SpinningDisc - Red.tif	BOX759
645	1	393.515	434.848	1	1	1	391	432	396	438	14	14963.4	4385.27	1	1	645	1448	645	MAX_20210209_lariat_box484_ex259a_4_w2SpinningDisc - Red.tif	BOX759
646	1	392.651	495.987	1	1	1	391	494	395	498	7	5217	597.938	1	0	646	0	646	MAX_20210209_lariat_box484_ex259a_4_w2SpinningDisc - Red.tif	BOX759
647	1	393.436	547.607	1	1	1	391	545	396	551	13	16997.3	4819.91	1	1	647	1449	647	MAX_20210209_lariat_box484_ex259a_4_w2SpinningDisc - Red.tif	BOX759
648	1	393.668	599.294	1	1	1	391	597	397	602	13	16331.5	7206.18	1	1	648	1450	648	MAX_20210209_lariat_box484_ex259a_4_w2SpinningDisc - Red.tif	BOX759
649	1	393.245	718.177	1	1	1	391	716	395	721	8	7072.33	1432.67	1	0	649	0	649	MAX_20210209_lariat_box484_ex259a_4_w2SpinningDisc - Red.tif	BOX759
650	1	394.151	352.107	1	1	1	392	350	396	354	6	3190.38	918.25	1	0	650	0	650	MAX_20210209_lariat_box484_ex259a_4_w2SpinningDisc - Red.tif	BOX759
651	1	394.721	419.138	1	1	1	392	416	397	422	13	17331.1	5840	1	1	651	1452	651	MAX_20210209_lariat_box484_ex259a_4_w2SpinningDisc - Red.tif	BOX759
652	1	394.215	743.221	1	1	1	392	740	396	748	11	7318.62	1816.62	1	0	652	0	652	MAX_20210209_lariat_box484_ex259a_4_w2SpinningDisc - Red.tif	BOX759
653	1	395.233	279.855	1	1	1	393	277	398	283	13	23531.9	9745.09	1	1	653	1451	653	MAX_20210209_lariat_box484_ex259a_4_w2SpinningDisc - Red.tif	BOX759
654	1	395.59	541.334	1	1	1	393	539	398	546	13	30389	14196	1	1	654	1453	654	MAX_20210209_lariat_box484_ex259a_4_w2SpinningDisc - Red.tif	BOX759
655	1	395.11	734.116	1	1	1	393	731	398	738	13	22212	9214	1	1	655	1454	655	MAX_20210209_lariat_box484_ex259a_4_w2SpinningDisc - Red.tif	BOX759
656	1	395.563	374.217	1	1	1	394	370	397	379	15	6871.67	3554.33	1	0	656	0	656	MAX_20210209_lariat_box484_ex259a_4_w2SpinningDisc - Red.tif	BOX759
657	1	395.831	458.85	1	1	1	394	457	398	461	6	2426.56	1046.56	1	0	657	0	657	MAX_20210209_lariat_box484_ex259a_4_w2SpinningDisc - Red.tif	BOX759
658	1	396.465	585.623	1	1	1	394	583	399	589	14	18701.2	5606.64	1	1	658	1455	658	MAX_20210209_lariat_box484_ex259a_4_w2SpinningDisc - Red.tif	BOX759
659	1	396.125	671.892	1	1	1	394	669	398	675	10	7166	1640.75	1	0	659	0	659	MAX_20210209_lariat_box484_ex259a_4_w2SpinningDisc - Red.tif	BOX759
660	1	396.066	706.176	1	1	1	394	704	399	710	11	18346.4	6430.64	1	1	660	1458	660	MAX_20210209_lariat_box484_ex259a_4_w2SpinningDisc - Red.tif	BOX759
661	1	395.164	801.29	1	1	1	394	798	397	804	6	3247.67	-364.667	1	0	661	0	661	MAX_20210209_lariat_box484_ex259a_4_w2SpinningDisc - Red.tif	BOX759
662	1	396.694	331.959	1	1	1	395	330	399	334	7	3616.69	29.5625	1	0	662	0	662	MAX_20210209_lariat_box484_ex259a_4_w2SpinningDisc - Red.tif	BOX759
663	1	398.248	396.385	1	1	1	395	394	401	400	14	31327.1	12752.5	1	1	663	1459	663	MAX_20210209_lariat_box484_ex259a_4_w2SpinningDisc - Red.tif	BOX759
664	1	397.502	560.871	1	1	1	395	558	400	565	14	25440	6746	1	1	664	1460	664	MAX_20210209_lariat_box484_ex259a_4_w2SpinningDisc - Red.tif	BOX759
665	1	396.918	603.292	1	1	1	395	601	399	606	11	13599	3369.33	1	1	665	1456	665	MAX_20210209_lariat_box484_ex259a_4_w2SpinningDisc - Red.tif	BOX759
666	1	397.141	635.275	1	1	1	395	633	400	639	12	18211.4	8004.82	1	1	666	1457	666	MAX_20210209_lariat_box484_ex259a_4_w2SpinningDisc - Red.tif	BOX759
667	1	397.048	657.885	1	1	1	395	655	399	661	11	9929.75	3093	1	0	667	0	667	MAX_20210209_lariat_box484_ex259a_4_w2SpinningDisc - Red.tif	BOX759
668	1	398.401	319.732	1	1	1	396	317	401	323	13	13280.3	1638.18	1	0	668	0	668	MAX_20210209_lariat_box484_ex259a_4_w2SpinningDisc - Red.tif	BOX759
669	1	398.035	404.803	1	1	1	396	403	400	407	6	4951.06	1363.5	1	0	669	0	669	MAX_20210209_lariat_box484_ex259a_4_w2SpinningDisc - Red.tif	BOX759
670	1	398.719	488.541	1	1	1	396	486	401	492	13	28292.6	7825.82	1	1	670	1461	670	MAX_20210209_lariat_box484_ex259a_4_w2SpinningDisc - Red.tif	BOX759
671	1	397.862	503.641	1	1	1	396	501	400	506	9	7206.67	766.333	1	0	671	0	671	MAX_20210209_lariat_box484_ex259a_4_w2SpinningDisc - Red.tif	BOX759
672	1	398.862	618.121	1	1	1	396	615	402	622	14	26313	7379.62	1	1	672	1462	672	MAX_20210209_lariat_box484_ex259a_4_w2SpinningDisc - Red.tif	BOX759
673	1	398.107	648.649	1	1	1	396	646	400	651	9	7346	853	1	0	673	0	673	MAX_20210209_lariat_box484_ex259a_4_w2SpinningDisc - Red.tif	BOX759
674	1	398.473	684.696	1	1	1	396	682	401	688	13	14964.7	5852.64	1	1	674	1464	674	MAX_20210209_lariat_box484_ex259a_4_w2SpinningDisc - Red.tif	BOX759
675	1	399.162	383.918	1	1	1	397	381	402	387	12	14383.5	6283.18	1	1	675	1466	675	MAX_20210209_lariat_box484_ex259a_4_w2SpinningDisc - Red.tif	BOX759
676	1	399.424	426.712	1	1	1	397	422	402	432	24	28681.2	12948.6	1	1	676	1467	676	MAX_20210209_lariat_box484_ex259a_4_w2SpinningDisc - Red.tif	BOX759
677	1	398.382	495.787	1	1	1	397	494	400	498	5	2484.29	431.571	1	0	677	0	677	MAX_20210209_lariat_box484_ex259a_4_w2SpinningDisc - Red.tif	BOX759
678	1	399.966	549.574	1	1	1	397	547	403	553	16	28759.6	9661.96	1	1	678	1468	678	MAX_20210209_lariat_box484_ex259a_4_w2SpinningDisc - Red.tif	BOX759
679	1	399.194	624.072	1	1	1	397	621	402	628	13	23295	14078	1	1	679	1463	679	MAX_20210209_lariat_box484_ex259a_4_w2SpinningDisc - Red.tif	BOX759
680	1	401.219	275.882	1	1	1	398	270	406	280	26	48938	19093	1	1	680	1465	680	MAX_20210209_lariat_box484_ex259a_4_w2SpinningDisc - Red.tif	BOX759
681	1	401.669	363.004	1	1	1	399	360	405	366	17	32186.8	16560.5	1	1	681	1469	681	MAX_20210209_lariat_box484_ex259a_4_w2SpinningDisc - Red.tif	BOX759
682	1	400.918	534.74	1	1	1	399	532	403	538	12	13790.2	4144.75	1	1	682	1470	682	MAX_20210209_lariat_box484_ex259a_4_w2SpinningDisc - Red.tif	BOX759
683	1	400.631	606.709	1	1	1	399	605	402	608	3	2549.33	-66.3333	1	0	683	0	683	MAX_20210209_lariat_box484_ex259a_4_w2SpinningDisc - Red.tif	BOX759
684	1	401.361	673.7	1	1	1	399	671	404	677	13	12933.8	5124.36	1	1	684	1471	684	MAX_20210209_lariat_box484_ex259a_4_w2SpinningDisc - Red.tif	BOX759
685	1	403.194	412.322	1	1	1	401	411	405	414	5	3150.57	587	1	0	685	0	685	MAX_20210209_lariat_box484_ex259a_4_w2SpinningDisc - Red.tif	BOX759
686	1	402.48	444.006	1	1	1	401	442	404	446	6	2557.14	748.143	1	0	686	0	686	MAX_20210209_lariat_box484_ex259a_4_w2SpinningDisc - Red.tif	BOX759
687	1	402	463.925	1	1	1	401	462	403	466	3	1129.5	39	1	0	687	0	687	MAX_20210209_lariat_box484_ex259a_4_w2SpinningDisc - Red.tif	BOX759
688	1	403.49	475.026	1	1	1	401	473	406	477	8	5970	386.667	1	0	688	0	688	MAX_20210209_lariat_box484_ex259a_4_w2SpinningDisc - Red.tif	BOX759
689	1	403.674	490.221	1	1	1	401	488	406	494	12	26975.5	7430.91	1	1	689	1474	689	MAX_20210209_lariat_box484_ex259a_4_w2SpinningDisc - Red.tif	BOX759
690	1	402.963	588.284	1	1	1	401	586	405	591	9	7370.67	2136	1	0	690	0	690	MAX_20210209_lariat_box484_ex259a_4_w2SpinningDisc - Red.tif	BOX759
691	1	402.822	645.88	1	1	1	401	644	404	648	4	3614.43	545.286	1	0	691	0	691	MAX_20210209_lariat_box484_ex259a_4_w2SpinningDisc - Red.tif	BOX759
692	1	404.031	328.161	1	1	1	402	326	406	331	10	8096.67	3032.33	1	0	692	0	692	MAX_20210209_lariat_box484_ex259a_4_w2SpinningDisc - Red.tif	BOX759
693	1	404.908	347.171	1	1	1	402	345	407	350	11	11299.4	5073	1	1	693	1478	693	MAX_20210209_lariat_box484_ex259a_4_w2SpinningDisc - Red.tif	BOX759
694	1	404.484	397.635	1	1	1	402	395	407	401	14	33885.8	15569.6	1	1	694	1473	694	MAX_20210209_lariat_box484_ex259a_4_w2SpinningDisc - Red.tif	BOX759
695	1	404.464	406.719	1	1	1	402	404	407	410	13	21854.2	7704.45	1	1	695	1476	695	MAX_20210209_lariat_box484_ex259a_4_w2SpinningDisc - Red.tif	BOX759
696	1	404.546	418.47	1	1	1	402	416	407	421	12	10593	1486.6	1	0	696	0	696	MAX_20210209_lariat_box484_ex259a_4_w2SpinningDisc - Red.tif	BOX759
697	1	403.975	510.184	1	1	1	402	508	406	513	10	7619.67	1687	1	0	697	0	697	MAX_20210209_lariat_box484_ex259a_4_w2SpinningDisc - Red.tif	BOX759
698	1	405.2	517.044	1	1	1	402	514	408	520	16	34825.3	13752.8	1	1	698	1475	698	MAX_20210209_lariat_box484_ex259a_4_w2SpinningDisc - Red.tif	BOX759
699	1	404.564	611.302	1	1	1	402	609	407	614	13	19944.6	4193.6	1	1	699	1477	699	MAX_20210209_lariat_box484_ex259a_4_w2SpinningDisc - Red.tif	BOX759
700	1	404.855	310.275	1	1	1	403	308	407	313	11	9399.33	2112	1	0	700	0	700	MAX_20210209_lariat_box484_ex259a_4_w2SpinningDisc - Red.tif	BOX759
701	1	407.33	368.155	1	1	1	404	365	410	371	16	44189.9	19630	1	1	701	1479	701	MAX_20210209_lariat_box484_ex259a_4_w2SpinningDisc - Red.tif	BOX759
702	1	407.23	451.209	1	1	1	404	449	411	455	17	56939.1	21804.4	1	1	702	1480	702	MAX_20210209_lariat_box484_ex259a_4_w2SpinningDisc - Red.tif	BOX759
703	1	406.117	539.302	1	1	1	404	537	408	542	9	5810	894.667	1	0	703	0	703	MAX_20210209_lariat_box484_ex259a_4_w2SpinningDisc - Red.tif	BOX759
704	1	407.826	298.92	1	1	1	405	296	410	302	12	14776.3	4738.45	1	1	704	1483	704	MAX_20210209_lariat_box484_ex259a_4_w2SpinningDisc - Red.tif	BOX759
705	1	407.734	338.598	1	1	1	405	336	410	341	10	8434.8	3030.8	1	0	705	0	705	MAX_20210209_lariat_box484_ex259a_4_w2SpinningDisc - Red.tif	BOX759
706	1	407.88	460.027	1	1	1	405	457	410	464	12	23956	5085	1	1	706	1484	706	MAX_20210209_lariat_box484_ex259a_4_w2SpinningDisc - Red.tif	BOX759
707	1	407.49	503.248	1	1	1	405	501	410	507	14	27517.6	11595.7	1	1	707	1481	707	MAX_20210209_lariat_box484_ex259a_4_w2SpinningDisc - Red.tif	BOX759
708	1	407.656	529.366	1	1	1	405	527	410	533	13	20503	9357.55	1	1	708	1485	708	MAX_20210209_lariat_box484_ex259a_4_w2SpinningDisc - Red.tif	BOX759
709	1	406.996	590.091	1	1	1	405	588	409	593	10	13076	3089.33	1	1	709	1482	709	MAX_20210209_lariat_box484_ex259a_4_w2SpinningDisc - Red.tif	BOX759
710	1	406.914	605.393	1	1	1	405	601	409	609	18	19080.1	5546.62	1	1	710	1486	710	MAX_20210209_lariat_box484_ex259a_4_w2SpinningDisc - Red.tif	BOX759
711	1	407.725	632.752	1	1	1	405	630	410	636	14	17077.9	3953.82	1	1	711	1492	711	MAX_20210209_lariat_box484_ex259a_4_w2SpinningDisc - Red.tif	BOX759
712	1	406.57	649.362	1	1	1	405	647	409	652	9	7545.67	1871	1	0	712	0	712	MAX_20210209_lariat_box484_ex259a_4_w2SpinningDisc - Red.tif	BOX759
713	1	406.492	656.446	1	1	1	405	655	408	658	4	1009.67	29.6667	1	0	713	0	713	MAX_20210209_lariat_box484_ex259a_4_w2SpinningDisc - Red.tif	BOX759
714	1	406.771	662.211	1	1	1	405	660	409	665	8	4435.33	145.333	1	0	714	0	714	MAX_20210209_lariat_box484_ex259a_4_w2SpinningDisc - Red.tif	BOX759
715	1	408.829	329.772	1	1	1	406	327	411	332	11	9233.2	4329.2	1	1	715	1487	715	MAX_20210209_lariat_box484_ex259a_4_w2SpinningDisc - Red.tif	BOX759
716	1	409.039	381.06	1	1	1	406	378	412	384	14	31582.7	12909.8	1	1	716	1488	716	MAX_20210209_lariat_box484_ex259a_4_w2SpinningDisc - Red.tif	BOX759
717	1	408.192	495.685	1	1	1	406	493	411	498	12	13033.4	1723	1	0	717	0	717	MAX_20210209_lariat_box484_ex259a_4_w2SpinningDisc - Red.tif	BOX759
718	1	407.602	550.786	1	1	1	406	549	409	553	5	3103.71	484	1	0	718	0	718	MAX_20210209_lariat_box484_ex259a_4_w2SpinningDisc - Red.tif	BOX759
719	1	409.752	577.39	1	1	1	406	575	413	581	19	35087.8	11400.6	1	1	719	1491	719	MAX_20210209_lariat_box484_ex259a_4_w2SpinningDisc - Red.tif	BOX759
720	1	407.638	774.318	1	1	1	406	772	410	777	9	6810.33	1168.33	1	0	720	0	720	MAX_20210209_lariat_box484_ex259a_4_w2SpinningDisc - Red.tif	BOX759
721	1	410.001	266.638	1	1	1	407	263	413	272	19	24075.7	8254.67	1	1	721	1495	721	MAX_20210209_lariat_box484_ex259a_4_w2SpinningDisc - Red.tif	BOX759
722	1	409.729	433.609	1	1	1	407	431	412	437	13	18413.9	5857.64	1	1	722	1493	722	MAX_20210209_lariat_box484_ex259a_4_w2SpinningDisc - Red.tif	BOX759
723	1	409.196	488.48	1	1	1	407	486	412	493	14	22879	10360	1	1	723	1489	723	MAX_20210209_lariat_box484_ex259a_4_w2SpinningDisc - Red.tif	BOX759
724	1	409.442	556.512	1	1	1	407	554	412	560	14	28948.5	10872.6	1	1	724	1490	724	MAX_20210209_lariat_box484_ex259a_4_w2SpinningDisc - Red.tif	BOX759
725	1	410.674	345.105	1	1	1	408	342	413	348	13	17258.5	8265.18	1	1	725	1496	725	MAX_20210209_lariat_box484_ex259a_4_w2SpinningDisc - Red.tif	BOX759
726	1	410.316	474.37	1	1	1	408	472	413	478	13	28773	10596.2	1	1	726	1494	726	MAX_20210209_lariat_box484_ex259a_4_w2SpinningDisc - Red.tif	BOX759
727	1	411.251	354.105	1	1	1	409	351	414	357	13	15100.2	6257.91	1	1	727	1498	727	MAX_20210209_lariat_box484_ex259a_4_w2SpinningDisc - Red.tif	BOX759
728	1	411.118	387.978	1	1	1	409	386	413	390	9	5264.5	578.75	1	0	728	0	728	MAX_20210209_lariat_box484_ex259a_4_w2SpinningDisc - Red.tif	BOX759
729	1	412.011	424.993	1	1	1	409	422	415	429	13	27040.2	10391.5	1	1	729	1499	729	MAX_20210209_lariat_box484_ex259a_4_w2SpinningDisc - Red.tif	BOX759
730	1	411.263	468.963	1	1	1	409	467	414	471	10	9193	1493	1	0	730	0	730	MAX_20210209_lariat_box484_ex259a_4_w2SpinningDisc - Red.tif	BOX759
731	1	410.988	568.99	1	1	1	409	566	413	573	11	13068.6	5740.09	1	1	731	1497	731	MAX_20210209_lariat_box484_ex259a_4_w2SpinningDisc - Red.tif	BOX759
732	1	410.118	621.267	1	1	1	409	619	412	624	5	2898	1270	1	0	732	0	732	MAX_20210209_lariat_box484_ex259a_4_w2SpinningDisc - Red.tif	BOX759
733	1	413.077	395.381	1	1	1	410	393	416	399	16	44311.9	17739.9	1	1	733	1501	733	MAX_20210209_lariat_box484_ex259a_4_w2SpinningDisc - Red.tif	BOX759
734	1	412.636	522.887	1	1	1	410	520	415	526	15	22717.9	6437.18	1	1	734	1502	734	MAX_20210209_lariat_box484_ex259a_4_w2SpinningDisc - Red.tif	BOX759
735	1	413.264	235.606	1	1	1	411	234	415	237	5	1268.86	49.7143	1	0	735	0	735	MAX_20210209_lariat_box484_ex259a_4_w2SpinningDisc - Red.tif	BOX759
736	1	413.633	453.244	1	1	1	411	451	416	457	13	30502.5	9323.18	1	1	736	1503	736	MAX_20210209_lariat_box484_ex259a_4_w2SpinningDisc - Red.tif	BOX759
737	1	412.484	612.916	1	1	1	411	611	414	615	6	4998.43	247.857	1	0	737	0	737	MAX_20210209_lariat_box484_ex259a_4_w2SpinningDisc - Red.tif	BOX759
738	1	413.797	228.004	1	1	1	412	226	415	230	4	1518	1420.86	1	0	738	0	738	MAX_20210209_lariat_box484_ex259a_4_w2SpinningDisc - Red.tif	BOX759
739	1	414.416	282.509	1	1	1	411	280	417	286	12	19749.3	13545.2	1	1	739	1500	739	MAX_20210209_lariat_box484_ex259a_4_w2SpinningDisc - Red.tif	BOX759
740	1	414.241	538.509	1	1	1	412	533	417	543	17	22186.4	9169.4	1	1	740	1505	740	MAX_20210209_lariat_box484_ex259a_4_w2SpinningDisc - Red.tif	BOX759
741	1	415.212	325.493	1	1	1	413	323	418	328	12	14989.2	5112.2	1	1	741	1504	741	MAX_20210209_lariat_box484_ex259a_4_w2SpinningDisc - Red.tif	BOX759
742	1	414.506	459.442	1	1	1	413	458	416	461	4	1810.33	78.6667	1	0	742	0	742	MAX_20210209_lariat_box484_ex259a_4_w2SpinningDisc - Red.tif	BOX759
743	1	415.128	561.41	1	1	1	413	559	418	565	13	19082.1	4735.45	1	1	743	1506	743	MAX_20210209_lariat_box484_ex259a_4_w2SpinningDisc - Red.tif	BOX759
744	1	416.795	251.945	1	1	1	414	250	419	254	10	8216.33	2078.67	1	0	744	0	744	MAX_20210209_lariat_box484_ex259a_4_w2SpinningDisc - Red.tif	BOX759
745	1	416.934	333.8	1	1	1	414	331	419	336	11	15491.6	4693	1	1	745	1509	745	MAX_20210209_lariat_box484_ex259a_4_w2SpinningDisc - Red.tif	BOX759
746	1	416.082	339.962	1	1	1	414	338	418	342	9	6434.56	3200.31	1	1	746	1507	746	MAX_20210209_lariat_box484_ex259a_4_w2SpinningDisc - Red.tif	BOX759
747	1	416.719	360.761	1	1	1	414	358	419	364	14	44412.3	21065.2	1	1	747	1508	747	MAX_20210209_lariat_box484_ex259a_4_w2SpinningDisc - Red.tif	BOX759
748	1	418.155	380.349	1	1	1	414	377	422	384	20	37316.6	15128.2	1	1	748	1510	748	MAX_20210209_lariat_box484_ex259a_4_w2SpinningDisc - Red.tif	BOX759
749	1	416.245	472.568	1	1	1	414	470	418	476	10	10630.5	4448	1	1	749	1511	749	MAX_20210209_lariat_box484_ex259a_4_w2SpinningDisc - Red.tif	BOX759
750	1	415.784	570.89	1	1	1	414	568	418	574	10	10211	1474.25	1	0	750	0	750	MAX_20210209_lariat_box484_ex259a_4_w2SpinningDisc - Red.tif	BOX759
751	1	417.683	215.448	1	1	1	415	213	420	218	11	7045.4	6140.4	1	1	751	1512	751	MAX_20210209_lariat_box484_ex259a_4_w2SpinningDisc - Red.tif	BOX759
752	1	417.869	242.722	1	1	1	415	240	420	245	11	11871.4	1092.4	1	0	752	0	752	MAX_20210209_lariat_box484_ex259a_4_w2SpinningDisc - Red.tif	BOX759
753	1	417.525	292.741	1	1	1	415	290	420	295	11	8133.2	4558.2	1	1	753	1513	753	MAX_20210209_lariat_box484_ex259a_4_w2SpinningDisc - Red.tif	BOX759
754	1	417.658	350.61	1	1	1	415	346	420	355	21	27605.1	11265.9	1	1	754	1514	754	MAX_20210209_lariat_box484_ex259a_4_w2SpinningDisc - Red.tif	BOX759
755	1	417.105	494.957	1	1	1	415	492	419	498	11	10896	2302.75	1	1	755	1515	755	MAX_20210209_lariat_box484_ex259a_4_w2SpinningDisc - Red.tif	BOX759
756	1	416.78	516.151	1	1	1	415	514	419	518	6	4230.75	-291.875	1	0	756	0	756	MAX_20210209_lariat_box484_ex259a_4_w2SpinningDisc - Red.tif	BOX759
757	1	416.621	579.801	1	1	1	415	578	418	582	5	2578.29	887.857	1	0	757	0	757	MAX_20210209_lariat_box484_ex259a_4_w2SpinningDisc - Red.tif	BOX759
758	1	417.439	320.443	1	1	1	416	319	419	322	4	2557	438	1	0	758	0	758	MAX_20210209_lariat_box484_ex259a_4_w2SpinningDisc - Red.tif	BOX759
759	1	418.064	454.361	1	1	1	416	452	420	457	7	7363.33	2455	1	0	759	0	759	MAX_20210209_lariat_box484_ex259a_4_w2SpinningDisc - Red.tif	BOX759
760	1	419.56	225.505	1	1	1	417	223	422	229	12	27945.2	8217.09	1	1	760	1517	760	MAX_20210209_lariat_box484_ex259a_4_w2SpinningDisc - Red.tif	BOX759
761	1	419.862	236.666	1	1	1	417	234	423	240	14	20971.8	8536.54	1	1	761	1518	761	MAX_20210209_lariat_box484_ex259a_4_w2SpinningDisc - Red.tif	BOX759
762	1	419.654	313.592	1	1	1	417	311	423	316	14	15518.3	3967.18	1	1	762	1519	762	MAX_20210209_lariat_box484_ex259a_4_w2SpinningDisc - Red.tif	BOX759
763	1	420.122	419.573	1	1	1	417	417	423	423	17	43651.2	15935.2	1	1	763	1522	763	MAX_20210209_lariat_box484_ex259a_4_w2SpinningDisc - Red.tif	BOX759
764	1	418.73	430.696	1	1	1	417	429	420	432	3	1836.67	-164.667	1	0	764	0	764	MAX_20210209_lariat_box484_ex259a_4_w2SpinningDisc - Red.tif	BOX759
765	1	419.484	444.513	1	1	1	417	441	423	449	17	54327	30977	1	1	765	1516	765	MAX_20210209_lariat_box484_ex259a_4_w2SpinningDisc - Red.tif	BOX759
766	1	420.469	404.435	1	1	1	418	402	423	407	12	28407.4	10932	1	1	766	1521	766	MAX_20210209_lariat_box484_ex259a_4_w2SpinningDisc - Red.tif	BOX759
767	1	420.625	412.232	1	1	1	418	409	423	416	15	20029	9460	1	1	767	1524	767	MAX_20210209_lariat_box484_ex259a_4_w2SpinningDisc - Red.tif	BOX759
768	1	421.134	300.046	1	1	1	419	298	423	302	8	4118.88	1282.62	1	0	768	0	768	MAX_20210209_lariat_box484_ex259a_4_w2SpinningDisc - Red.tif	BOX759
769	1	420.731	336.629	1	1	1	419	334	423	339	9	11032	2803.67	1	0	769	0	769	MAX_20210209_lariat_box484_ex259a_4_w2SpinningDisc - Red.tif	BOX759
770	1	421.544	369.436	1	1	1	419	367	424	372	12	10076.2	5132.8	1	1	770	1525	770	MAX_20210209_lariat_box484_ex259a_4_w2SpinningDisc - Red.tif	BOX759
771	1	420.786	478.563	1	1	1	419	475	423	483	15	7238.88	3649.25	1	0	771	0	771	MAX_20210209_lariat_box484_ex259a_4_w2SpinningDisc - Red.tif	BOX759
772	1	421.303	489.666	1	1	1	419	487	423	493	11	11172.8	3581.25	1	1	772	1526	772	MAX_20210209_lariat_box484_ex259a_4_w2SpinningDisc - Red.tif	BOX759
773	1	422.179	278.025	1	1	1	420	275	425	281	12	12073.6	2338.18	1	0	773	0	773	MAX_20210209_lariat_box484_ex259a_4_w2SpinningDisc - Red.tif	BOX759
774	1	421.353	325.703	1	1	1	420	324	423	328	5	2505.86	682.571	1	0	774	0	774	MAX_20210209_lariat_box484_ex259a_4_w2SpinningDisc - Red.tif	BOX759
775	1	422.624	357.44	1	1	1	420	355	425	360	11	10867.6	2376.4	1	0	775	0	775	MAX_20210209_lariat_box484_ex259a_4_w2SpinningDisc - Red.tif	BOX759
776	1	422.48	461.612	1	1	1	420	459	425	465	13	15503.6	5072.55	1	1	776	1528	776	MAX_20210209_lariat_box484_ex259a_4_w2SpinningDisc - Red.tif	BOX759
777	1	423.495	289.268	1	1	1	421	287	426	292	14	20639	7049.2	1	1	777	1527	777	MAX_20210209_lariat_box484_ex259a_4_w2SpinningDisc - Red.tif	BOX759
778	1	425.248	250.225	1	1	1	423	248	427	253	8	6162.67	1335.33	1	0	778	0	778	MAX_20210209_lariat_box484_ex259a_4_w2SpinningDisc - Red.tif	BOX759
779	1	425.712	258.94	1	1	1	423	256	428	262	14	13867.7	5158.18	1	1	779	1529	779	MAX_20210209_lariat_box484_ex259a_4_w2SpinningDisc - Red.tif	BOX759
780	1	424.539	348.747	1	1	1	423	346	426	351	7	3426.5	1248.5	1	0	780	0	780	MAX_20210209_lariat_box484_ex259a_4_w2SpinningDisc - Red.tif	BOX759
781	1	425.181	374.811	1	1	1	423	372	428	377	11	9641.2	3624.2	1	1	781	1530	781	MAX_20210209_lariat_box484_ex259a_4_w2SpinningDisc - Red.tif	BOX759
782	1	424.507	389.948	1	1	1	423	388	426	392	6	2890.43	1084	1	0	782	0	782	MAX_20210209_lariat_box484_ex259a_4_w2SpinningDisc - Red.tif	BOX759
783	1	424.499	705.512	1	1	1	423	704	426	707	4	1645.67	-53	1	0	783	0	783	MAX_20210209_lariat_box484_ex259a_4_w2SpinningDisc - Red.tif	BOX759
784	1	426.159	308.179	1	1	1	424	306	428	310	6	3956.56	1248.31	1	0	784	0	784	MAX_20210209_lariat_box484_ex259a_4_w2SpinningDisc - Red.tif	BOX759
785	1	427.057	313.909	1	1	1	425	311	429	317	11	14014.5	5303.25	1	1	785	1531	785	MAX_20210209_lariat_box484_ex259a_4_w2SpinningDisc - Red.tif	BOX759
786	1	427.23	397.418	1	1	1	425	395	429	400	10	8097	3068.33	1	1	786	1533	786	MAX_20210209_lariat_box484_ex259a_4_w2SpinningDisc - Red.tif	BOX759
787	1	427.874	238.686	1	1	1	426	236	430	242	11	13604.8	5129.75	1	1	787	1534	787	MAX_20210209_lariat_box484_ex259a_4_w2SpinningDisc - Red.tif	BOX759
788	1	427.577	288.002	1	1	1	426	286	430	290	7	5423.88	1481.88	1	0	788	0	788	MAX_20210209_lariat_box484_ex259a_4_w2SpinningDisc - Red.tif	BOX759
789	1	428.813	331.038	1	1	1	426	327	431	336	24	47888.4	26073.3	1	1	789	1532	789	MAX_20210209_lariat_box484_ex259a_4_w2SpinningDisc - Red.tif	BOX759
790	1	429.31	252.96	1	1	1	427	251	431	255	7	6577.75	1496.81	1	0	790	0	790	MAX_20210209_lariat_box484_ex259a_4_w2SpinningDisc - Red.tif	BOX759
791	1	428.486	360.413	1	1	1	427	359	430	362	4	2601.33	592.333	1	0	791	0	791	MAX_20210209_lariat_box484_ex259a_4_w2SpinningDisc - Red.tif	BOX759
792	1	430.332	228.989	1	1	1	428	226	433	232	14	16995.7	6004.45	1	1	792	1537	792	MAX_20210209_lariat_box484_ex259a_4_w2SpinningDisc - Red.tif	BOX759
793	1	430.331	351.38	1	1	1	428	349	433	354	13	18764.2	6709.6	1	1	793	1536	793	MAX_20210209_lariat_box484_ex259a_4_w2SpinningDisc - Red.tif	BOX759
794	1	429.906	387.706	1	1	1	428	386	432	390	7	4424.44	1436.38	1	0	794	0	794	MAX_20210209_lariat_box484_ex259a_4_w2SpinningDisc - Red.tif	BOX759
795	1	430.157	424.645	1	1	1	428	422	432	427	9	6052.67	2017.67	1	0	795	0	795	MAX_20210209_lariat_box484_ex259a_4_w2SpinningDisc - Red.tif	BOX759
796	1	432.087	297.315	1	1	1	428	293	435	301	20	23402.8	22273.2	1	1	796	1535	796	MAX_20210209_lariat_box484_ex259a_4_w2SpinningDisc - Red.tif	BOX759
797	1	431.969	382.047	1	1	1	430	380	434	384	9	6778	1814.19	1	0	797	0	797	MAX_20210209_lariat_box484_ex259a_4_w2SpinningDisc - Red.tif	BOX759
798	1	432.893	194.375	1	1	1	431	192	435	198	11	11008.5	5267.25	1	1	798	1538	798	MAX_20210209_lariat_box484_ex259a_4_w2SpinningDisc - Red.tif	BOX759
799	1	434.837	237.583	1	1	1	432	235	438	241	15	29260.3	10917.5	1	1	799	1539	799	MAX_20210209_lariat_box484_ex259a_4_w2SpinningDisc - Red.tif	BOX759
800	1	434.837	210.826	1	1	1	433	209	437	213	6	3003.12	832.875	1	0	800	0	800	MAX_20210209_lariat_box484_ex259a_4_w2SpinningDisc - Red.tif	BOX759
801	1	435.179	359.18	1	1	1	433	357	437	361	6	4589.62	1720.19	1	0	801	0	801	MAX_20210209_lariat_box484_ex259a_4_w2SpinningDisc - Red.tif	BOX759
802	1	435.678	259.909	1	1	1	434	258	438	262	7	4467.25	1374.12	1	0	802	0	802	MAX_20210209_lariat_box484_ex259a_4_w2SpinningDisc - Red.tif	BOX759
803	1	437.872	320.267	1	1	1	435	318	440	324	12	15675.5	10181.4	1	1	803	1541	803	MAX_20210209_lariat_box484_ex259a_4_w2SpinningDisc - Red.tif	BOX759
804	1	437.552	334.64	1	1	1	435	332	440	338	13	30490.6	15154.9	1	1	804	1540	804	MAX_20210209_lariat_box484_ex259a_4_w2SpinningDisc - Red.tif	BOX759
805	1	438.812	191.234	1	1	1	436	189	442	195	14	26341.6	15485.9	1	1	805	1542	805	MAX_20210209_lariat_box484_ex259a_4_w2SpinningDisc - Red.tif	BOX759
806	1	438.749	173.924	1	1	1	437	172	440	176	4	1983.43	344.571	1	0	806	0	806	MAX_20210209_lariat_box484_ex259a_4_w2SpinningDisc - Red.tif	BOX759
807	1	438.946	283.079	1	1	1	437	281	441	286	10	9313	1813.33	1	0	807	0	807	MAX_20210209_lariat_box484_ex259a_4_w2SpinningDisc - Red.tif	BOX759
808	1	439.538	299.414	1	1	1	437	297	442	302	12	17538.4	6626	1	1	808	1543	808	MAX_20210209_lariat_box484_ex259a_4_w2SpinningDisc - Red.tif	BOX759
809	1	440.389	247.694	1	1	1	438	244	443	252	19	20625.6	6285.08	1	0	809	0	809	MAX_20210209_lariat_box484_ex259a_4_w2SpinningDisc - Red.tif	BOX759
810	1	441.505	202.389	1	1	1	439	200	444	205	10	8555.8	1908.6	1	0	810	0	810	MAX_20210209_lariat_box484_ex259a_4_w2SpinningDisc - Red.tif	BOX759
811	1	441.919	309.39	1	1	1	439	307	445	312	15	23572.8	11710.5	1	1	811	1544	811	MAX_20210209_lariat_box484_ex259a_4_w2SpinningDisc - Red.tif	BOX759
812	1	443.04	168.597	1	1	1	440	166	446	172	15	21353.5	14382.7	1	1	812	1545	812	MAX_20210209_lariat_box484_ex259a_4_w2SpinningDisc - Red.tif	BOX759
813	1	441.611	216.71	1	1	1	440	215	443	219	5	3100.71	855.714	1	0	813	0	813	MAX_20210209_lariat_box484_ex259a_4_w2SpinningDisc - Red.tif	BOX759
814	1	441.349	233.666	1	1	1	440	232	443	235	3	1398.33	-10.6667	1	0	814	0	814	MAX_20210209_lariat_box484_ex259a_4_w2SpinningDisc - Red.tif	BOX759
815	1	442.781	260.984	1	1	1	440	258	445	264	12	12693.8	2167.18	1	1	815	1546	815	MAX_20210209_lariat_box484_ex259a_4_w2SpinningDisc - Red.tif	BOX759
816	1	441.41	315.214	1	1	1	440	313	443	317	5	2835.14	1264.71	1	0	816	0	816	MAX_20210209_lariat_box484_ex259a_4_w2SpinningDisc - Red.tif	BOX759
817	1	443.134	277.332	1	1	1	441	275	445	281	11	11099.2	4850.5	1	1	817	1547	817	MAX_20210209_lariat_box484_ex259a_4_w2SpinningDisc - Red.tif	BOX759
818	1	443.857	291.986	1	1	1	441	290	446	294	10	7697.33	1785.33	1	0	818	0	818	MAX_20210209_lariat_box484_ex259a_4_w2SpinningDisc - Red.tif	BOX759
819	1	442.49	326.868	1	1	1	441	325	444	329	6	2967.29	623.143	1	0	819	0	819	MAX_20210209_lariat_box484_ex259a_4_w2SpinningDisc - Red.tif	BOX759
820	1	444.147	300.847	1	1	1	442	299	446	303	6	5243.12	950.25	1	0	820	0	820	MAX_20210209_lariat_box484_ex259a_4_w2SpinningDisc - Red.tif	BOX759
821	1	445.292	215.421	1	1	1	443	213	447	218	8	5410.67	1913.33	1	0	821	0	821	MAX_20210209_lariat_box484_ex259a_4_w2SpinningDisc - Red.tif	BOX759
822	1	446.313	270.724	1	1	1	443	269	449	273	12	8679.25	2715.25	1	0	822	0	822	MAX_20210209_lariat_box484_ex259a_4_w2SpinningDisc - Red.tif	BOX759
823	1	444.253	649.952	1	1	1	443	648	446	652	4	2757.86	1011.57	1	0	823	0	823	MAX_20210209_lariat_box484_ex259a_4_w2SpinningDisc - Red.tif	BOX759
824	1	446.415	229.614	1	1	1	445	228	448	231	4	1990	181.333	1	0	824	0	824	MAX_20210209_lariat_box484_ex259a_4_w2SpinningDisc - Red.tif	BOX759
825	1	448.107	234.828	1	1	1	445	232	451	239	15	35017.2	13014.9	1	1	825	1548	825	MAX_20210209_lariat_box484_ex259a_4_w2SpinningDisc - Red.tif	BOX759
826	1	447.887	286.701	1	1	1	445	284	451	290	14	18335.7	8761.67	1	1	826	1549	826	MAX_20210209_lariat_box484_ex259a_4_w2SpinningDisc - Red.tif	BOX759
827	1	447.429	262.449	1	1	1	446	261	449	264	4	1905	40.3333	1	0	827	0	827	MAX_20210209_lariat_box484_ex259a_4_w2SpinningDisc - Red.tif	BOX759
828	1	448.977	159.522	1	1	1	447	157	451	162	8	5571.33	2058.67	1	0	828	0	828	MAX_20210209_lariat_box484_ex259a_4_w2SpinningDisc - Red.tif	BOX759
829	1	449.555	276.596	1	1	1	447	274	452	280	12	20564.3	7195.55	1	1	829	1550	829	MAX_20210209_lariat_box484_ex259a_4_w2SpinningDisc - Red.tif	BOX759
830	1	449.857	219.614	1	1	1	448	217	452	222	9	9497.67	1329.33	1	0	830	0	830	MAX_20210209_lariat_box484_ex259a_4_w2SpinningDisc - Red.tif	BOX759
831	1	450.164	259.51	1	1	1	448	257	452	262	10	8720.33	2406	1	1	831	1554	831	MAX_20210209_lariat_box484_ex259a_4_w2SpinningDisc - Red.tif	BOX759
832	1	449.473	296.93	1	1	1	448	295	451	299	6	2852.29	700.429	1	0	832	0	832	MAX_20210209_lariat_box484_ex259a_4_w2SpinningDisc - Red.tif	BOX759
833	1	451.293	148.708	1	1	1	449	146	454	151	10	8087.4	3571.4	1	1	833	1551	833	MAX_20210209_lariat_box484_ex259a_4_w2SpinningDisc - Red.tif	BOX759
834	1	451.256	292.222	1	1	1	449	290	454	295	10	10672	3566.8	1	1	834	1555	834	MAX_20210209_lariat_box484_ex259a_4_w2SpinningDisc - Red.tif	BOX759
835	1	452.398	178.706	1	1	1	450	176	455	182	13	22318.2	7253.36	1	1	835	1556	835	MAX_20210209_lariat_box484_ex259a_4_w2SpinningDisc - Red.tif	BOX759
836	1	452.265	282.93	1	1	1	450	281	454	285	7	5652.75	789.562	1	0	836	0	836	MAX_20210209_lariat_box484_ex259a_4_w2SpinningDisc - Red.tif	BOX759
837	1	452.441	524.498	1	1	1	451	523	454	526	4	1176.67	178.667	1	0	837	0	837	MAX_20210209_lariat_box484_ex259a_4_w2SpinningDisc - Red.tif	BOX759
838	1	454.687	212.419	1	1	1	452	210	457	216	11	12472.1	3305	1	1	838	1557	838	MAX_20210209_lariat_box484_ex259a_4_w2SpinningDisc - Red.tif	BOX759
839	1	455.769	268.732	1	1	1	453	266	458	272	10	11706.6	5371.82	1	1	839	1558	839	MAX_20210209_lariat_box484_ex259a_4_w2SpinningDisc - Red.tif	BOX759
840	1	454.652	509.489	1	1	1	453	507	456	512	6	2682	432	1	0	840	0	840	MAX_20210209_lariat_box484_ex259a_4_w2SpinningDisc - Red.tif	BOX759
841	1	456.218	182.463	1	1	1	454	180	458	185	10	9520	860.333	1	0	841	0	841	MAX_20210209_lariat_box484_ex259a_4_w2SpinningDisc - Red.tif	BOX759
842	1	456.331	241.003	1	1	1	454	238	459	244	14	13303.7	2154.82	1	0	842	0	842	MAX_20210209_lariat_box484_ex259a_4_w2SpinningDisc - Red.tif	BOX759
843	1	458.151	247.922	1	1	1	455	245	461	252	14	27560.8	11336.6	1	1	843	1559	843	MAX_20210209_lariat_box484_ex259a_4_w2SpinningDisc - Red.tif	BOX759
844	1	457.747	171.986	1	1	1	456	170	462	174	4	3011.75	2751.5	1	1	844	1561	844	MAX_20210209_lariat_box484_ex259a_4_w2SpinningDisc - Red.tif	BOX759
845	1	459.031	258.899	1	1	1	456	256	462	262	12	22621.4	9085.75	1	1	845	1560	845	MAX_20210209_lariat_box484_ex259a_4_w2SpinningDisc - Red.tif	BOX759
846	1	457.45	279.986	1	1	1	456	278	459	282	6	1639.57	280.143	1	0	846	0	846	MAX_20210209_lariat_box484_ex259a_4_w2SpinningDisc - Red.tif	BOX759
847	1	458.511	227.452	1	1	1	457	226	460	229	4	2375.67	-120.333	1	0	847	0	847	MAX_20210209_lariat_box484_ex259a_4_w2SpinningDisc - Red.tif	BOX759
848	1	460.105	212.088	1	1	1	458	210	462	214	8	5558.31	1738.5	1	0	848	0	848	MAX_20210209_lariat_box484_ex259a_4_w2SpinningDisc - Red.tif	BOX759
849	1	460.017	556.309	1	1	1	458	553	462	559	11	7918.25	2127.25	1	0	849	0	849	MAX_20210209_lariat_box484_ex259a_4_w2SpinningDisc - Red.tif	BOX759
850	1	461.897	190.068	1	1	1	459	187	465	194	14	31064.5	12928.9	1	1	850	1562	850	MAX_20210209_lariat_box484_ex259a_4_w2SpinningDisc - Red.tif	BOX759
851	1	461.947	217.977	1	1	1	459	216	465	220	11	7077	2358	1	0	851	0	851	MAX_20210209_lariat_box484_ex259a_4_w2SpinningDisc - Red.tif	BOX759
852	1	461.269	263.973	1	1	1	459	262	463	266	7	5253.19	1015.69	1	0	852	0	852	MAX_20210209_lariat_box484_ex259a_4_w2SpinningDisc - Red.tif	BOX759
853	1	464.284	130.97	1	1	1	462	129	466	133	7	4827.56	2791.69	1	1	853	1564	853	MAX_20210209_lariat_box484_ex259a_4_w2SpinningDisc - Red.tif	BOX759
854	1	463.891	205.594	1	1	1	462	203	466	209	9	9780.75	4101.5	1	1	854	1563	854	MAX_20210209_lariat_box484_ex259a_4_w2SpinningDisc - Red.tif	BOX759
855	1	464.519	232.015	1	1	1	462	230	467	234	8	6224.33	724.667	1	0	855	0	855	MAX_20210209_lariat_box484_ex259a_4_w2SpinningDisc - Red.tif	BOX759
856	1	464.941	134.983	1	1	1	463	133	467	137	5	3477.62	1000.88	1	0	856	0	856	MAX_20210209_lariat_box484_ex259a_4_w2SpinningDisc - Red.tif	BOX759
857	1	464.9	145.376	1	1	1	463	141	467	151	21	27107.7	7784.04	1	1	857	1566	857	MAX_20210209_lariat_box484_ex259a_4_w2SpinningDisc - Red.tif	BOX759
858	1	465.717	252.268	1	1	1	463	250	469	255	14	22631	6720.91	1	1	858	1565	858	MAX_20210209_lariat_box484_ex259a_4_w2SpinningDisc - Red.tif	BOX759
859	1	465.296	171.879	1	1	1	464	170	467	174	4	1656.86	438.571	1	0	859	0	859	MAX_20210209_lariat_box484_ex259a_4_w2SpinningDisc - Red.tif	BOX759
860	1	468.467	194.89	1	1	1	465	192	471	198	14	16695.3	5085.12	1	1	860	1568	860	MAX_20210209_lariat_box484_ex259a_4_w2SpinningDisc - Red.tif	BOX759
861	1	466.969	244.008	1	1	1	465	242	469	246	5	3407.56	959.688	1	0	861	0	861	MAX_20210209_lariat_box484_ex259a_4_w2SpinningDisc - Red.tif	BOX759
862	1	467.993	167.732	1	1	1	466	166	470	170	7	4682.62	458.75	1	0	862	0	862	MAX_20210209_lariat_box484_ex259a_4_w2SpinningDisc - Red.tif	BOX759
863	1	467.382	380.197	1	1	1	466	378	469	382	5	2934	324	1	0	863	0	863	MAX_20210209_lariat_box484_ex259a_4_w2SpinningDisc - Red.tif	BOX759
864	1	470.857	238.957	1	1	1	468	236	473	242	12	12942.5	3081.64	1	1	864	1569	864	MAX_20210209_lariat_box484_ex259a_4_w2SpinningDisc - Red.tif	BOX759
865	1	471.598	135.543	1	1	1	469	133	474	138	12	12839	1447.2	1	0	865	0	865	MAX_20210209_lariat_box484_ex259a_4_w2SpinningDisc - Red.tif	BOX759
866	1	472.347	215.494	1	1	1	469	213	475	218	11	8318.73	889.909	1	0	866	0	866	MAX_20210209_lariat_box484_ex259a_4_w2SpinningDisc - Red.tif	BOX759
867	1	471.817	233.125	1	1	1	469	231	474	236	11	11087.6	3653.4	1	1	867	1571	867	MAX_20210209_lariat_box484_ex259a_4_w2SpinningDisc - Red.tif	BOX759
868	1	470.483	397.918	1	1	1	469	396	472	400	6	3088.29	841.857	1	0	868	0	868	MAX_20210209_lariat_box484_ex259a_4_w2SpinningDisc - Red.tif	BOX759
869	1	472.05	225.257	1	1	1	470	223	474	229	10	14226.8	4942	1	1	869	1570	869	MAX_20210209_lariat_box484_ex259a_4_w2SpinningDisc - Red.tif	BOX759
870	1	473.517	141.541	1	1	1	471	139	476	144	12	14549.8	3490.8	1	1	870	1572	870	MAX_20210209_lariat_box484_ex259a_4_w2SpinningDisc - Red.tif	BOX759
871	1	473.24	146.966	1	1	1	471	145	475	149	7	3445.12	601.938	1	0	871	0	871	MAX_20210209_lariat_box484_ex259a_4_w2SpinningDisc - Red.tif	BOX759
872	1	473.487	327.965	1	1	1	471	326	476	330	8	5583.33	1312	1	0	872	0	872	MAX_20210209_lariat_box484_ex259a_4_w2SpinningDisc - Red.tif	BOX759
873	1	472.5	409.46	1	1	1	471	408	474	411	4	1537.67	320.667	1	0	873	0	873	MAX_20210209_lariat_box484_ex259a_4_w2SpinningDisc - Red.tif	BOX759
874	1	472.408	517.165	1	1	1	471	515	474	519	5	2127.86	418.571	1	0	874	0	874	MAX_20210209_lariat_box484_ex259a_4_w2SpinningDisc - Red.tif	BOX759
875	1	476.079	227.962	1	1	1	474	225	479	231	12	22136.2	9146.82	1	1	875	1573	875	MAX_20210209_lariat_box484_ex259a_4_w2SpinningDisc - Red.tif	BOX759
876	1	476.505	590.764	1	1	1	474	586	479	596	19	27069.8	13401.4	1	1	876	1574	876	MAX_20210209_lariat_box484_ex259a_4_w2SpinningDisc - Red.tif	BOX759
877	1	477.469	166.451	1	1	1	475	164	480	169	12	14812	5317	1	1	877	1575	877	MAX_20210209_lariat_box484_ex259a_4_w2SpinningDisc - Red.tif	BOX759
878	1	478.016	156.514	1	1	1	476	155	480	158	6	2628.86	56.8571	1	0	878	0	878	MAX_20210209_lariat_box484_ex259a_4_w2SpinningDisc - Red.tif	BOX759
879	1	478.142	208.236	1	1	1	476	206	481	212	11	12251.4	5598.73	1	1	879	1576	879	MAX_20210209_lariat_box484_ex259a_4_w2SpinningDisc - Red.tif	BOX759
880	1	478.238	213.247	1	1	1	476	211	481	216	10	13254.8	5461.6	1	1	880	1577	880	MAX_20210209_lariat_box484_ex259a_4_w2SpinningDisc - Red.tif	BOX759
881	1	479.671	107.945	1	1	1	478	106	482	110	7	3724.38	1399.94	1	0	881	0	881	MAX_20210209_lariat_box484_ex259a_4_w2SpinningDisc - Red.tif	BOX759
882	1	480.186	188.39	1	1	1	478	186	482	192	10	14233.8	3358.5	1	1	882	1578	882	MAX_20210209_lariat_box484_ex259a_4_w2SpinningDisc - Red.tif	BOX759
883	1	479.519	580.957	1	1	1	478	579	481	583	6	2633.86	656.857	1	0	883	0	883	MAX_20210209_lariat_box484_ex259a_4_w2SpinningDisc - Red.tif	BOX759
884	1	480.498	550.469	1	1	1	479	549	482	552	4	1494.67	521.333	1	0	884	0	884	MAX_20210209_lariat_box484_ex259a_4_w2SpinningDisc - Red.tif	BOX759
885	1	482.086	128.366	1	1	1	480	126	484	131	9	9196	798.333	1	0	885	0	885	MAX_20210209_lariat_box484_ex259a_4_w2SpinningDisc - Red.tif	BOX759
886	1	482.508	560.804	1	1	1	480	558	485	565	14	21624	12036	1	1	886	1579	886	MAX_20210209_lariat_box484_ex259a_4_w2SpinningDisc - Red.tif	BOX759
887	1	483.954	145.763	1	1	1	481	143	486	149	11	12497.9	3811.09	1	1	887	1583	887	MAX_20210209_lariat_box484_ex259a_4_w2SpinningDisc - Red.tif	BOX759
888	1	483.766	156.305	1	1	1	481	154	486	159	12	12154.6	5509.6	1	1	888	1581	888	MAX_20210209_lariat_box484_ex259a_4_w2SpinningDisc - Red.tif	BOX759
889	1	483.458	182.002	1	1	1	481	179	486	186	16	23729	7602	1	1	889	1582	889	MAX_20210209_lariat_box484_ex259a_4_w2SpinningDisc - Red.tif	BOX759
890	1	482.763	543.437	1	1	1	481	541	485	547	10	12236.2	6285.75	1	1	890	1580	890	MAX_20210209_lariat_box484_ex259a_4_w2SpinningDisc - Red.tif	BOX759
891	1	484.095	208.227	1	1	1	482	206	486	211	9	4885.33	635.667	1	0	891	0	891	MAX_20210209_lariat_box484_ex259a_4_w2SpinningDisc - Red.tif	BOX759
892	1	484.512	132.869	1	1	1	483	131	486	135	6	3527.57	1187.43	1	0	892	0	892	MAX_20210209_lariat_box484_ex259a_4_w2SpinningDisc - Red.tif	BOX759
893	1	484.291	507.318	1	1	1	483	506	486	509	3	757	386.667	1	0	893	0	893	MAX_20210209_lariat_box484_ex259a_4_w2SpinningDisc - Red.tif	BOX759
894	1	485.246	520.639	1	1	1	483	518	487	525	11	12771.5	6917.73	1	1	894	1585	894	MAX_20210209_lariat_box484_ex259a_4_w2SpinningDisc - Red.tif	BOX759
895	1	487.269	196.023	1	1	1	484	190	490	200	22	33881.2	12162.4	1	1	895	1586	895	MAX_20210209_lariat_box484_ex259a_4_w2SpinningDisc - Red.tif	BOX759
896	1	485.733	514.96	1	1	1	484	513	488	518	7	7751.67	3085.33	1	1	896	1584	896	MAX_20210209_lariat_box484_ex259a_4_w2SpinningDisc - Red.tif	BOX759
897	1	485.846	532.799	1	1	1	484	531	488	535	8	6238.62	1005.81	1	0	897	0	897	MAX_20210209_lariat_box484_ex259a_4_w2SpinningDisc - Red.tif	BOX759
898	1	487.42	96.3255	1	1	1	486	94	489	99	7	4671.5	2048.5	1	0	898	0	898	MAX_20210209_lariat_box484_ex259a_4_w2SpinningDisc - Red.tif	BOX759
899	1	488.677	105.228	1	1	1	486	103	491	108	10	9664.2	3362.2	1	0	899	0	899	MAX_20210209_lariat_box484_ex259a_4_w2SpinningDisc - Red.tif	BOX759
900	1	488.14	537.944	1	1	1	486	535	491	541	12	11922.6	2483.36	1	1	900	1588	900	MAX_20210209_lariat_box484_ex259a_4_w2SpinningDisc - Red.tif	BOX759
901	1	488.819	121.133	1	1	1	487	119	491	123	8	4830.81	613.938	1	0	901	0	901	MAX_20210209_lariat_box484_ex259a_4_w2SpinningDisc - Red.tif	BOX759
902	1	490.088	497.822	1	1	1	487	495	493	501	12	18785.1	6488.58	1	1	902	1589	902	MAX_20210209_lariat_box484_ex259a_4_w2SpinningDisc - Red.tif	BOX759
903	1	488.915	502.465	1	1	1	487	500	491	505	8	6965.67	3394.67	1	1	903	1587	903	MAX_20210209_lariat_box484_ex259a_4_w2SpinningDisc - Red.tif	BOX759
904	1	489.966	508.46	1	1	1	488	506	492	512	8	5678.5	3682	1	1	904	1590	904	MAX_20210209_lariat_box484_ex259a_4_w2SpinningDisc - Red.tif	BOX759
905	1	491.396	134.433	1	1	1	489	132	494	137	11	8778.8	1723.6	1	0	905	0	905	MAX_20210209_lariat_box484_ex259a_4_w2SpinningDisc - Red.tif	BOX759
906	1	491.472	167.711	1	1	1	489	165	494	171	13	12651.1	3847.45	1	1	906	1591	906	MAX_20210209_lariat_box484_ex259a_4_w2SpinningDisc - Red.tif	BOX759
907	1	492.42	93.4901	1	1	1	490	91	495	97	12	15228.9	6469	1	1	907	1592	907	MAX_20210209_lariat_box484_ex259a_4_w2SpinningDisc - Red.tif	BOX759
908	1	492.51	128.955	1	1	1	490	127	495	131	8	6449.67	451	1	0	908	0	908	MAX_20210209_lariat_box484_ex259a_4_w2SpinningDisc - Red.tif	BOX759
909	1	492.767	140.642	1	1	1	490	138	495	144	10	11779.9	5023.82	1	1	909	1593	909	MAX_20210209_lariat_box484_ex259a_4_w2SpinningDisc - Red.tif	BOX759
910	1	493.159	159.643	1	1	1	491	157	495	162	9	9598	1984	1	0	910	0	910	MAX_20210209_lariat_box484_ex259a_4_w2SpinningDisc - Red.tif	BOX759
911	1	492.897	480.59	1	1	1	491	478	495	484	10	7529.5	3003.25	1	0	911	0	911	MAX_20210209_lariat_box484_ex259a_4_w2SpinningDisc - Red.tif	BOX759
912	1	496.597	176.078	1	1	1	493	173	501	180	19	25804.4	10386	1	1	912	1594	912	MAX_20210209_lariat_box484_ex259a_4_w2SpinningDisc - Red.tif	BOX759
913	1	495.509	468.486	1	1	1	493	466	498	472	12	11047.7	6504.91	1	1	913	1595	913	MAX_20210209_lariat_box484_ex259a_4_w2SpinningDisc - Red.tif	BOX759
914	1	498.304	446.074	1	1	1	495	444	502	449	17	14706	7317	1	1	914	1597	914	MAX_20210209_lariat_box484_ex259a_4_w2SpinningDisc - Red.tif	BOX759
915	1	496.976	453.651	1	1	1	495	451	499	457	11	7683.25	4609.75	1	1	915	1596	915	MAX_20210209_lariat_box484_ex259a_4_w2SpinningDisc - Red.tif	BOX759
916	1	496.199	475.902	1	1	1	495	474	498	478	4	2312.29	1591.86	1	0	916	0	916	MAX_20210209_lariat_box484_ex259a_4_w2SpinningDisc - Red.tif	BOX759
917	1	497.468	90.5001	1	1	1	496	88	499	93	8	4044.5	1201	1	0	917	0	917	MAX_20210209_lariat_box484_ex259a_4_w2SpinningDisc - Red.tif	BOX759
918	1	497.961	108.922	1	1	1	496	106	500	112	11	6656.5	1161.75	1	0	918	0	918	MAX_20210209_lariat_box484_ex259a_4_w2SpinningDisc - Red.tif	BOX759
919	1	497.483	183.451	1	1	1	496	182	499	185	4	1823.33	616.667	1	0	919	0	919	MAX_20210209_lariat_box484_ex259a_4_w2SpinningDisc - Red.tif	BOX759
920	1	498.036	397.533	1	1	1	496	395	500	400	8	4340.33	962.667	1	0	920	0	920	MAX_20210209_lariat_box484_ex259a_4_w2SpinningDisc - Red.tif	BOX759
921	1	500.07	132.465	1	1	1	497	130	503	136	16	31042.7	10821.5	1	1	921	1599	921	MAX_20210209_lariat_box484_ex259a_4_w2SpinningDisc - Red.tif	BOX759
922	1	499.653	157.77	1	1	1	497	155	502	161	12	17675.7	3951.64	1	1	922	1598	922	MAX_20210209_lariat_box484_ex259a_4_w2SpinningDisc - Red.tif	BOX759
923	1	501.987	426.663	1	1	1	500	425	504	429	7	5672.25	3468.62	1	1	923	1600	923	MAX_20210209_lariat_box484_ex259a_4_w2SpinningDisc - Red.tif	BOX759
924	1	502.717	460.629	1	1	1	501	459	505	462	5	2314.43	966.286	1	0	924	0	924	MAX_20210209_lariat_box484_ex259a_4_w2SpinningDisc - Red.tif	BOX759
925	1	504.694	401.143	1	1	1	502	399	507	403	9	5318.67	3275.67	1	0	925	0	925	MAX_20210209_lariat_box484_ex259a_4_w2SpinningDisc - Red.tif	BOX759
926	1	505.404	119.306	1	1	1	503	117	508	122	13	17494.8	4107.6	1	1	926	1601	926	MAX_20210209_lariat_box484_ex259a_4_w2SpinningDisc - Red.tif	BOX759
927	1	504.354	156.104	1	1	1	503	154	506	158	5	2951.57	685.429	1	0	927	0	927	MAX_20210209_lariat_box484_ex259a_4_w2SpinningDisc - Red.tif	BOX759
928	1	506.187	422.765	1	1	1	504	421	508	424	4	1134.86	39.1429	1	0	928	0	928	MAX_20210209_lariat_box484_ex259a_4_w2SpinningDisc - Red.tif	BOX759
929	1	508.048	86.9806	1	1	1	506	85	510	89	7	3953.38	103.5	1	0	929	0	929	MAX_20210209_lariat_box484_ex259a_4_w2SpinningDisc - Red.tif	BOX759
930	1	507.572	384.252	1	1	1	506	382	509	387	7	5351.5	2494	1	0	930	0	930	MAX_20210209_lariat_box484_ex259a_4_w2SpinningDisc - Red.tif	BOX759
931	1	510.04	372.477	1	1	1	507	370	514	375	15	19738	9339	1	1	931	1602	931	MAX_20210209_lariat_box484_ex259a_4_w2SpinningDisc - Red.tif	BOX759
932	1	510.555	101.681	1	1	1	508	99	513	104	14	28194.2	-414.2	1	0	932	0	932	MAX_20210209_lariat_box484_ex259a_4_w2SpinningDisc - Red.tif	BOX759
933	1	509.602	366.753	1	1	1	508	364	511	369	7	3320	1493.5	1	0	933	0	933	MAX_20210209_lariat_box484_ex259a_4_w2SpinningDisc - Red.tif	BOX759
934	1	510.786	392.43	1	1	1	508	389	514	396	17	14091.7	7612.69	1	1	934	1606	934	MAX_20210209_lariat_box484_ex259a_4_w2SpinningDisc - Red.tif	BOX759
935	1	510.231	411.849	1	1	1	508	410	513	414	8	4233.33	1945	1	0	935	0	935	MAX_20210209_lariat_box484_ex259a_4_w2SpinningDisc - Red.tif	BOX759
936	1	510.648	92.9386	1	1	1	509	91	513	95	7	4223.38	791.875	1	0	936	0	936	MAX_20210209_lariat_box484_ex259a_4_w2SpinningDisc - Red.tif	BOX759
937	1	511.627	335.652	1	1	1	509	333	514	339	13	14698	7058.18	1	1	937	1603	937	MAX_20210209_lariat_box484_ex259a_4_w2SpinningDisc - Red.tif	BOX759
938	1	511.201	349.549	1	1	1	509	347	513	353	10	11123	6318.5	1	1	938	1604	938	MAX_20210209_lariat_box484_ex259a_4_w2SpinningDisc - Red.tif	BOX759
939	1	511.069	358.498	1	1	1	509	356	513	361	8	6066.67	1689	1	0	939	0	939	MAX_20210209_lariat_box484_ex259a_4_w2SpinningDisc - Red.tif	BOX759
940	1	512.002	386.073	1	1	1	509	384	517	389	15	16814.1	9295.62	1	1	940	1605	940	MAX_20210209_lariat_box484_ex259a_4_w2SpinningDisc - Red.tif	BOX759
941	1	512.009	115.47	1	1	1	510	113	514	118	8	8043.67	1852.67	1	0	941	0	941	MAX_20210209_lariat_box484_ex259a_4_w2SpinningDisc - Red.tif	BOX759
942	1	512.309	327.011	1	1	1	510	325	515	330	10	10185.6	4339.4	1	1	942	1607	942	MAX_20210209_lariat_box484_ex259a_4_w2SpinningDisc - Red.tif	BOX759
943	1	515.599	109.42	1	1	1	512	106	518	114	18	28007.8	8679	1	1	943	1608	943	MAX_20210209_lariat_box484_ex259a_4_w2SpinningDisc - Red.tif	BOX759
944	1	515.005	139.747	1	1	1	513	137	517	144	13	14525.6	4324.45	1	1	944	1609	944	MAX_20210209_lariat_box484_ex259a_4_w2SpinningDisc - Red.tif	BOX759
945	1	516.496	126.989	1	1	1	514	125	519	129	8	6231.67	1388.67	1	0	945	0	945	MAX_20210209_lariat_box484_ex259a_4_w2SpinningDisc - Red.tif	BOX759
946	1	515.691	228.592	1	1	1	514	227	517	230	3	1273	-148	1	0	946	0	946	MAX_20210209_lariat_box484_ex259a_4_w2SpinningDisc - Red.tif	BOX759
947	1	515.848	300.7	1	1	1	514	298	518	303	9	5276.67	1399.67	1	0	947	0	947	MAX_20210209_lariat_box484_ex259a_4_w2SpinningDisc - Red.tif	BOX759
948	1	518.03	318.789	1	1	1	515	316	521	322	12	14841.6	6417.79	1	1	948	1610	948	MAX_20210209_lariat_box484_ex259a_4_w2SpinningDisc - Red.tif	BOX759
949	1	518.913	357.083	1	1	1	515	354	522	360	17	22533.9	9770.85	1	1	949	1611	949	MAX_20210209_lariat_box484_ex259a_4_w2SpinningDisc - Red.tif	BOX759
950	1	517.004	379.288	1	1	1	515	377	519	381	7	3463.81	1360.56	1	0	950	0	950	MAX_20210209_lariat_box484_ex259a_4_w2SpinningDisc - Red.tif	BOX759
951	1	518.362	61.7727	1	1	1	516	59	521	65	10	11349	5613.36	1	1	951	1612	951	MAX_20210209_lariat_box484_ex259a_4_w2SpinningDisc - Red.tif	BOX759
952	1	518.043	312.473	1	1	1	516	311	520	314	6	3364.43	652.714	1	0	952	0	952	MAX_20210209_lariat_box484_ex259a_4_w2SpinningDisc - Red.tif	BOX759
953	1	517.842	367.299	1	1	1	516	365	520	370	10	7387.33	2769	1	0	953	0	953	MAX_20210209_lariat_box484_ex259a_4_w2SpinningDisc - Red.tif	BOX759
954	1	517	374.978	1	1	1	516	373	518	377	3	1428	319.75	1	0	954	0	954	MAX_20210209_lariat_box484_ex259a_4_w2SpinningDisc - Red.tif	BOX759
955	1	517.342	399.136	1	1	1	516	397	519	401	5	1140.71	786.286	1	0	955	0	955	MAX_20210209_lariat_box484_ex259a_4_w2SpinningDisc - Red.tif	BOX759
956	1	520.09	132.859	1	1	1	518	131	522	135	8	5443.88	810	1	0	956	0	956	MAX_20210209_lariat_box484_ex259a_4_w2SpinningDisc - Red.tif	BOX759
957	1	520.498	306.012	1	1	1	518	304	523	310	10	14881.4	6940.09	1	1	957	1613	957	MAX_20210209_lariat_box484_ex259a_4_w2SpinningDisc - Red.tif	BOX759
958	1	520.735	55.423	1	1	1	519	54	523	57	5	876.286	337.286	1	0	958	0	958	MAX_20210209_lariat_box484_ex259a_4_w2SpinningDisc - Red.tif	BOX759
959	1	520.915	343.767	1	1	1	519	341	523	347	12	11038.2	3241.75	1	1	959	1614	959	MAX_20210209_lariat_box484_ex259a_4_w2SpinningDisc - Red.tif	BOX759
960	1	520.833	372.578	1	1	1	519	370	522	375	5	4569	1643	1	0	960	0	960	MAX_20210209_lariat_box484_ex259a_4_w2SpinningDisc - Red.tif	BOX759
961	1	521.57	364.204	1	1	1	520	362	523	366	5	4052.14	2075.71	1	1	961	1615	961	MAX_20210209_lariat_box484_ex259a_4_w2SpinningDisc - Red.tif	BOX759
962	1	523.763	86.3388	1	1	1	521	84	526	89	10	7746.8	1641	1	0	962	0	962	MAX_20210209_lariat_box484_ex259a_4_w2SpinningDisc - Red.tif	BOX759
963	1	523.746	96.7797	1	1	1	521	94	526	100	14	15979.5	3424.55	1	0	963	0	963	MAX_20210209_lariat_box484_ex259a_4_w2SpinningDisc - Red.tif	BOX759
964	1	524.305	113.94	1	1	1	522	112	526	116	7	4161.38	943.875	1	0	964	0	964	MAX_20210209_lariat_box484_ex259a_4_w2SpinningDisc - Red.tif	BOX759
965	1	524.932	126.126	1	1	1	523	124	527	129	10	6879	1621	1	0	965	0	965	MAX_20210209_lariat_box484_ex259a_4_w2SpinningDisc - Red.tif	BOX759
966	1	525.236	290.745	1	1	1	523	289	527	293	6	4417.06	855.875	1	0	966	0	966	MAX_20210209_lariat_box484_ex259a_4_w2SpinningDisc - Red.tif	BOX759
967	1	525.56	298.456	1	1	1	523	296	528	301	12	9368	435.4	1	0	967	0	967	MAX_20210209_lariat_box484_ex259a_4_w2SpinningDisc - Red.tif	BOX759
968	1	524.766	345.811	1	1	1	523	344	527	348	6	5892.12	2275	1	1	968	1616	968	MAX_20210209_lariat_box484_ex259a_4_w2SpinningDisc - Red.tif	BOX759
969	1	524.884	353.876	1	1	1	523	351	527	357	10	5693	4699	1	1	969	1617	969	MAX_20210209_lariat_box484_ex259a_4_w2SpinningDisc - Red.tif	BOX759
970	1	526.18	55.8021	1	1	1	524	54	528	58	8	5182	288	1	0	970	0	970	MAX_20210209_lariat_box484_ex259a_4_w2SpinningDisc - Red.tif	BOX759
971	1	526.771	305.403	1	1	1	524	303	530	309	12	14001.2	7414.29	1	1	971	1618	971	MAX_20210209_lariat_box484_ex259a_4_w2SpinningDisc - Red.tif	BOX759
972	1	527.681	45.5966	1	1	1	525	43	530	48	13	16166.4	5955.8	1	1	972	1619	972	MAX_20210209_lariat_box484_ex259a_4_w2SpinningDisc - Red.tif	BOX759
973	1	526.822	61.3148	1	1	1	525	59	529	64	9	7616.67	1187.67	1	0	973	0	973	MAX_20210209_lariat_box484_ex259a_4_w2SpinningDisc - Red.tif	BOX759
974	1	527.799	316.732	1	1	1	525	314	531	320	14	15404.4	6350.71	1	1	974	1621	974	MAX_20210209_lariat_box484_ex259a_4_w2SpinningDisc - Red.tif	BOX759
975	1	527.816	72.7445	1	1	1	526	71	530	75	6	4308.62	938.125	1	0	975	0	975	MAX_20210209_lariat_box484_ex259a_4_w2SpinningDisc - Red.tif	BOX759
976	1	528.113	286.033	1	1	1	526	284	531	290	10	8413.64	4814.09	1	1	976	1620	976	MAX_20210209_lariat_box484_ex259a_4_w2SpinningDisc - Red.tif	BOX759
977	1	529.556	89.4652	1	1	1	527	87	532	92	12	15258.8	2060.8	1	0	977	0	977	MAX_20210209_lariat_box484_ex259a_4_w2SpinningDisc - Red.tif	BOX759
978	1	528.525	327.487	1	1	1	527	326	530	329	4	2264.33	-166	1	0	978	0	978	MAX_20210209_lariat_box484_ex259a_4_w2SpinningDisc - Red.tif	BOX759
979	1	529.163	351.366	1	1	1	527	349	531	354	7	4840.67	2017.33	1	0	979	0	979	MAX_20210209_lariat_box484_ex259a_4_w2SpinningDisc - Red.tif	BOX759
980	1	530.754	265.242	1	1	1	529	263	533	268	8	5232	184	1	0	980	0	980	MAX_20210209_lariat_box484_ex259a_4_w2SpinningDisc - Red.tif	BOX759
981	1	530.999	270.501	1	1	1	529	268	533	273	8	5301	1403.67	1	0	981	0	981	MAX_20210209_lariat_box484_ex259a_4_w2SpinningDisc - Red.tif	BOX759
982	1	531.479	332.212	1	1	1	529	330	534	335	14	12811.2	4417.6	1	1	982	1622	982	MAX_20210209_lariat_box484_ex259a_4_w2SpinningDisc - Red.tif	BOX759
983	1	532.008	72.9719	1	1	1	530	71	534	75	9	5898.69	799.125	1	0	983	0	983	MAX_20210209_lariat_box484_ex259a_4_w2SpinningDisc - Red.tif	BOX759
984	1	532.849	294.85	1	1	1	530	292	535	299	11	10206	5875	1	1	984	1623	984	MAX_20210209_lariat_box484_ex259a_4_w2SpinningDisc - Red.tif	BOX759
985	1	533.515	52.3559	1	1	1	531	50	536	55	12	11643.6	2831.8	1	0	985	0	985	MAX_20210209_lariat_box484_ex259a_4_w2SpinningDisc - Red.tif	BOX759
986	1	532.952	60.9928	1	1	1	531	59	535	63	9	5375.31	668.875	1	0	986	0	986	MAX_20210209_lariat_box484_ex259a_4_w2SpinningDisc - Red.tif	BOX759
987	1	532.651	282.193	1	1	1	531	280	534	284	5	2531.86	431	1	0	987	0	987	MAX_20210209_lariat_box484_ex259a_4_w2SpinningDisc - Red.tif	BOX759
988	1	534.121	103.06	1	1	1	532	101	536	105	8	4211.69	901.75	1	0	988	0	988	MAX_20210209_lariat_box484_ex259a_4_w2SpinningDisc - Red.tif	BOX759
989	1	535.012	307.833	1	1	1	533	305	537	312	10	9536.82	3298.18	1	1	989	1624	989	MAX_20210209_lariat_box484_ex259a_4_w2SpinningDisc - Red.tif	BOX759
990	1	534.514	315.487	1	1	1	533	314	536	317	4	1450.67	-112	1	0	990	0	990	MAX_20210209_lariat_box484_ex259a_4_w2SpinningDisc - Red.tif	BOX759
991	1	535.657	265.33	1	1	1	534	264	537	267	3	1193	59.6667	1	0	991	0	991	MAX_20210209_lariat_box484_ex259a_4_w2SpinningDisc - Red.tif	BOX759
992	1	535.439	273.49	1	1	1	534	272	537	275	4	1173.67	-295	1	0	992	0	992	MAX_20210209_lariat_box484_ex259a_4_w2SpinningDisc - Red.tif	BOX759
993	1	536.111	289.599	1	1	1	534	287	538	293	9	8947	2869.5	1	1	993	1625	993	MAX_20210209_lariat_box484_ex259a_4_w2SpinningDisc - Red.tif	BOX759
994	1	537.476	84.927	1	1	1	535	83	540	87	8	4964	904.333	1	0	994	0	994	MAX_20210209_lariat_box484_ex259a_4_w2SpinningDisc - Red.tif	BOX759
995	1	536.494	236.921	1	1	1	535	235	538	239	6	2427.29	1050.86	1	0	995	0	995	MAX_20210209_lariat_box484_ex259a_4_w2SpinningDisc - Red.tif	BOX759
996	1	537.7	256.719	1	1	1	535	253	540	261	17	21185.1	5916	1	1	996	1626	996	MAX_20210209_lariat_box484_ex259a_4_w2SpinningDisc - Red.tif	BOX759
997	1	538.633	35.5956	1	1	1	536	33	541	38	11	9004.8	2415.2	1	1	997	1627	997	MAX_20210209_lariat_box484_ex259a_4_w2SpinningDisc - Red.tif	BOX759
998	1	537.6	75.7314	1	1	1	536	74	539	78	5	2239.43	284.571	1	0	998	0	998	MAX_20210209_lariat_box484_ex259a_4_w2SpinningDisc - Red.tif	BOX759
999	1	539.364	29.1931	1	1	1	537	27	542	32	11	6088.2	2098.4	1	0	999	0	999	MAX_20210209_lariat_box484_ex259a_4_w2SpinningDisc - Red.tif	BOX759
1000	1	539.224	282.097	1	1	1	537	280	542	285	11	9092.4	2302.6	1	0	1000	0	1000	MAX_20210209_lariat_box484_ex259a_4_w2SpinningDisc - Red.tif	BOX759
1001	1	540.012	226.715	1	1	1	538	225	542	229	7	5264.69	529.188	1	0	1001	0	1001	MAX_20210209_lariat_box484_ex259a_4_w2SpinningDisc - Red.tif	BOX759
1002	1	539.845	299.839	1	1	1	538	298	542	302	8	3351.75	-188.75	1	0	1002	0	1002	MAX_20210209_lariat_box484_ex259a_4_w2SpinningDisc - Red.tif	BOX759
1003	1	541.377	247.505	1	1	1	539	245	544	252	12	19866	7903	1	1	1003	1628	1003	MAX_20210209_lariat_box484_ex259a_4_w2SpinningDisc - Red.tif	BOX759
1004	1	541	92.9419	1	1	1	540	91	542	95	3	700.75	277.25	1	0	1004	0	1004	MAX_20210209_lariat_box484_ex259a_4_w2SpinningDisc - Red.tif	BOX759
1005	1	542.187	238.432	1	1	1	540	235	545	243	13	11487.5	3758.08	1	0	1005	0	1005	MAX_20210209_lariat_box484_ex259a_4_w2SpinningDisc - Red.tif	BOX759
1006	1	545.097	277.702	1	1	1	542	275	548	280	15	11333.5	1962.73	1	0	1006	0	1006	MAX_20210209_lariat_box484_ex259a_4_w2SpinningDisc - Red.tif	BOX759
1007	1	544.74	213.081	1	1	1	543	209	547	217	15	11094.9	2661.38	1	0	1007	0	1007	MAX_20210209_lariat_box484_ex259a_4_w2SpinningDisc - Red.tif	BOX759
1008	1	545.831	42.469	1	1	1	544	40	548	45	10	7883.67	1131	1	0	1008	0	1008	MAX_20210209_lariat_box484_ex259a_4_w2SpinningDisc - Red.tif	BOX759
1009	1	545.831	54.3738	1	1	1	544	53	548	56	5	2221.14	-397.714	1	0	1009	0	1009	MAX_20210209_lariat_box484_ex259a_4_w2SpinningDisc - Red.tif	BOX759
1010	1	546.478	267.75	1	1	1	544	265	549	272	12	15753	4043	1	1	1010	1629	1010	MAX_20210209_lariat_box484_ex259a_4_w2SpinningDisc - Red.tif	BOX759
1011	1	547.552	197.098	1	1	1	545	195	550	200	9	8204	2482.2	1	0	1011	0	1011	MAX_20210209_lariat_box484_ex259a_4_w2SpinningDisc - Red.tif	BOX759
1012	1	546.437	222.786	1	1	1	545	219	548	227	13	6210.09	2220.09	1	0	1012	0	1012	MAX_20210209_lariat_box484_ex259a_4_w2SpinningDisc - Red.tif	BOX759
1013	1	547.961	20.3308	1	1	1	546	18	550	23	9	8774.67	2993.33	1	1	1013	1630	1013	MAX_20210209_lariat_box484_ex259a_4_w2SpinningDisc - Red.tif	BOX759
1014	1	548.645	32.3385	1	1	1	546	30	551	35	13	14782.2	3390	1	1	1014	1631	1014	MAX_20210209_lariat_box484_ex259a_4_w2SpinningDisc - Red.tif	BOX759
1015	1	548.614	50.346	1	1	1	547	48	551	53	9	7911.33	1972	1	0	1015	0	1015	MAX_20210209_lariat_box484_ex259a_4_w2SpinningDisc - Red.tif	BOX759
1016	1	548.98	59.6694	1	1	1	547	58	551	62	7	4500.62	1316.31	1	0	1016	0	1016	MAX_20210209_lariat_box484_ex259a_4_w2SpinningDisc - Red.tif	BOX759
1017	1	548.531	64.8847	1	1	1	547	63	550	67	6	3803.57	457.714	1	0	1017	0	1017	MAX_20210209_lariat_box484_ex259a_4_w2SpinningDisc - Red.tif	BOX759
1018	1	549.399	74.781	1	1	1	548	73	551	77	5	2165	1031.43	1	0	1018	0	1018	MAX_20210209_lariat_box484_ex259a_4_w2SpinningDisc - Red.tif	BOX759
1019	1	550.124	255.69	1	1	1	548	253	552	258	9	5620.67	-561	1	0	1019	0	1019	MAX_20210209_lariat_box484_ex259a_4_w2SpinningDisc - Red.tif	BOX759
1020	1	549.382	261.16	1	1	1	548	259	551	263	5	2569.14	-147.571	1	0	1020	0	1020	MAX_20210209_lariat_box484_ex259a_4_w2SpinningDisc - Red.tif	BOX759
1021	1	553.22	19.8205	1	1	1	551	17	556	23	13	16656.3	4868.09	1	1	1021	1632	1021	MAX_20210209_lariat_box484_ex259a_4_w2SpinningDisc - Red.tif	BOX759
1022	1	555.868	65.2896	1	1	1	552	63	559	68	15	11779	2558	1	0	1022	0	1022	MAX_20210209_lariat_box484_ex259a_4_w2SpinningDisc - Red.tif	BOX759
1023	1	554.856	228.402	1	1	1	552	226	557	232	13	18797.7	5713.18	1	1	1023	1633	1023	MAX_20210209_lariat_box484_ex259a_4_w2SpinningDisc - Red.tif	BOX759
1024	1	555.947	11.4893	1	1	1	554	9	558	14	8	5667	2526.67	1	0	1024	0	1024	MAX_20210209_lariat_box484_ex259a_4_w2SpinningDisc - Red.tif	BOX759
1025	1	556.625	199.864	1	1	1	554	198	559	202	9	5436	1425.33	1	0	1025	0	1025	MAX_20210209_lariat_box484_ex259a_4_w2SpinningDisc - Red.tif	BOX759
1026	1	555.527	248.835	1	1	1	554	247	557	251	6	3209.29	-142.429	1	0	1026	0	1026	MAX_20210209_lariat_box484_ex259a_4_w2SpinningDisc - Red.tif	BOX759
1027	1	558.207	34.3613	1	1	1	556	31	561	38	15	10945	2606	1	0	1027	0	1027	MAX_20210209_lariat_box484_ex259a_4_w2SpinningDisc - Red.tif	BOX759
1028	1	557.759	53.0099	1	1	1	556	51	559	55	4	2140.43	148	1	0	1028	0	1028	MAX_20210209_lariat_box484_ex259a_4_w2SpinningDisc - Red.tif	BOX759
1029	1	559.023	18.0215	1	1	1	557	16	561	20	9	5794.56	821.188	1	0	1029	0	1029	MAX_20210209_lariat_box484_ex259a_4_w2SpinningDisc - Red.tif	BOX759
1030	1	560.8	184.137	1	1	1	558	182	563	187	11	10943.4	2548.6	1	0	1030	0	1030	MAX_20210209_lariat_box484_ex259a_4_w2SpinningDisc - Red.tif	BOX759
1031	1	561.451	46.4403	1	1	1	559	44	564	50	13	22351.3	7077.73	1	1	1031	1634	1031	MAX_20210209_lariat_box484_ex259a_4_w2SpinningDisc - Red.tif	BOX759
1032	1	563.602	54.401	1	1	1	561	52	566	57	13	12736.6	1529.8	1	0	1032	0	1032	MAX_20210209_lariat_box484_ex259a_4_w2SpinningDisc - Red.tif	BOX759
1033	1	564.181	215.329	1	1	1	562	211	567	218	14	14648	3067	1	0	1033	0	1033	MAX_20210209_lariat_box484_ex259a_4_w2SpinningDisc - Red.tif	BOX759
1034	1	564.851	11.1667	1	1	1	563	9	567	13	6	7307.25	1644.75	1	0	1034	0	1034	MAX_20210209_lariat_box484_ex259a_4_w2SpinningDisc - Red.tif	BOX759
1035	1	565.533	195.336	1	1	1	563	193	568	198	13	11724.8	2141.2	1	0	1035	0	1035	MAX_20210209_lariat_box484_ex259a_4_w2SpinningDisc - Red.tif	BOX759
1036	1	564.443	230.474	1	1	1	563	229	566	232	4	1430	-27.3333	1	0	1036	0	1036	MAX_20210209_lariat_box484_ex259a_4_w2SpinningDisc - Red.tif	BOX759
1037	1	565.483	154.586	1	1	1	564	153	567	156	4	1647.67	-99.6667	1	0	1037	0	1037	MAX_20210209_lariat_box484_ex259a_4_w2SpinningDisc - Red.tif	BOX759
1038	1	566.228	178.989	1	1	1	564	177	569	182	10	9278.4	3225.2	1	1	1038	1635	1038	MAX_20210209_lariat_box484_ex259a_4_w2SpinningDisc - Red.tif	BOX759
1039	1	567.662	14.6329	1	1	1	565	12	570	17	10	8776.8	1150.2	1	0	1039	0	1039	MAX_20210209_lariat_box484_ex259a_4_w2SpinningDisc - Red.tif	BOX759
1040	1	569.101	204.671	1	1	1	566	203	573	207	13	9200.18	1746.18	1	0	1040	0	1040	MAX_20210209_lariat_box484_ex259a_4_w2SpinningDisc - Red.tif	BOX759
1041	1	568.667	28.5502	1	1	1	567	27	571	30	5	3029.86	211.571	1	0	1041	0	1041	MAX_20210209_lariat_box484_ex259a_4_w2SpinningDisc - Red.tif	BOX759
1042	1	570.403	173.429	1	1	1	567	171	573	175	9	4858.75	1067.25	1	0	1042	0	1042	MAX_20210209_lariat_box484_ex259a_4_w2SpinningDisc - Red.tif	BOX759
1043	1	570.332	146.745	1	1	1	568	144	573	149	10	9342.8	1768	1	0	1043	0	1043	MAX_20210209_lariat_box484_ex259a_4_w2SpinningDisc - Red.tif	BOX759
1044	1	570.107	189.68	1	1	1	568	187	572	192	9	11394	1002.67	1	0	1044	0	1044	MAX_20210209_lariat_box484_ex259a_4_w2SpinningDisc - Red.tif	BOX759
1045	1	570.148	199.828	1	1	1	568	198	572	202	6	5588.56	1050.88	1	0	1045	0	1045	MAX_20210209_lariat_box484_ex259a_4_w2SpinningDisc - Red.tif	BOX759
1046	1	570.688	42.3129	1	1	1	569	41	572	44	3	1889.67	311.667	1	0	1046	0	1046	MAX_20210209_lariat_box484_ex259a_4_w2SpinningDisc - Red.tif	BOX759
1047	1	572.585	22.4945	1	1	1	570	20	575	25	12	13303.2	2827.2	1	1	1047	1636	1047	MAX_20210209_lariat_box484_ex259a_4_w2SpinningDisc - Red.tif	BOX759
1048	1	572.692	36.8874	1	1	1	570	35	575	39	9	5966.67	377.333	1	0	1048	0	1048	MAX_20210209_lariat_box484_ex259a_4_w2SpinningDisc - Red.tif	BOX759
1049	1	573.513	195.953	1	1	1	572	194	575	198	6	4380.14	368.286	1	0	1049	0	1049	MAX_20210209_lariat_box484_ex259a_4_w2SpinningDisc - Red.tif	BOX759
1050	1	575.231	148.095	1	1	1	573	146	577	150	7	4796.94	-133.875	1	0	1050	0	1050	MAX_20210209_lariat_box484_ex259a_4_w2SpinningDisc - Red.tif	BOX759
1051	1	577.296	166.684	1	1	1	575	164	580	169	10	8964	58.8	1	0	1051	0	1051	MAX_20210209_lariat_box484_ex259a_4_w2SpinningDisc - Red.tif	BOX759
1052	1	577.312	180.292	1	1	1	576	179	579	182	3	1969.67	397	1	0	1052	0	1052	MAX_20210209_lariat_box484_ex259a_4_w2SpinningDisc - Red.tif	BOX759
1053	1	578.073	193.816	1	1	1	576	192	580	196	8	4128.69	1979.44	1	0	1053	0	1053	MAX_20210209_lariat_box484_ex259a_4_w2SpinningDisc - Red.tif	BOX759
1054	1	578.81	136.181	1	1	1	577	134	581	138	6	3208.81	726.312	1	0	1054	0	1054	MAX_20210209_lariat_box484_ex259a_4_w2SpinningDisc - Red.tif	BOX759
1055	1	578.42	173.638	1	1	1	577	171	580	176	7	4124	1167.5	1	0	1055	0	1055	MAX_20210209_lariat_box484_ex259a_4_w2SpinningDisc - Red.tif	BOX759
1056	1	579.998	183.483	1	1	1	578	181	582	186	10	6022.33	1233	1	0	1056	0	1056	MAX_20210209_lariat_box484_ex259a_4_w2SpinningDisc - Red.tif	BOX759
1057	1	580.45	18.0033	1	1	1	579	16	582	20	6	2151.29	825.571	1	0	1057	0	1057	MAX_20210209_lariat_box484_ex259a_4_w2SpinningDisc - Red.tif	BOX759
1058	1	583.065	123.966	1	1	1	581	122	585	126	9	4610.25	1127.19	1	0	1058	0	1058	MAX_20210209_lariat_box484_ex259a_4_w2SpinningDisc - Red.tif	BOX759
1059	1	583.158	129.277	1	1	1	581	127	585	132	9	8095.67	835.333	1	0	1059	0	1059	MAX_20210209_lariat_box484_ex259a_4_w2SpinningDisc - Red.tif	BOX759
1060	1	585.861	19.1236	1	1	1	584	17	588	21	8	5417.56	906	1	0	1060	0	1060	MAX_20210209_lariat_box484_ex259a_4_w2SpinningDisc - Red.tif	BOX759
1061	1	586.498	166.923	1	1	1	584	165	589	169	8	6304.67	430.667	1	0	1061	0	1061	MAX_20210209_lariat_box484_ex259a_4_w2SpinningDisc - Red.tif	BOX759
1062	1	587.339	133.984	1	1	1	585	132	589	136	7	5173.5	696.375	1	0	1062	0	1062	MAX_20210209_lariat_box484_ex259a_4_w2SpinningDisc - Red.tif	BOX759
1063	1	587.695	12.957	1	1	1	586	11	590	15	7	3321.06	339.312	1	0	1063	0	1063	MAX_20210209_lariat_box484_ex259a_4_w2SpinningDisc - Red.tif	BOX759
1064	1	588.432	120.219	1	1	1	587	118	590	123	7	3992	1413	1	0	1064	0	1064	MAX_20210209_lariat_box484_ex259a_4_w2SpinningDisc - Red.tif	BOX759
1065	1	591.151	225.386	1	1	1	589	223	593	228	7	4175.33	739.333	1	0	1065	0	1065	MAX_20210209_lariat_box484_ex259a_4_w2SpinningDisc - Red.tif	BOX759
1066	1	593.201	160.995	1	1	1	591	157	595	166	15	10591.2	2255.77	1	0	1066	0	1066	MAX_20210209_lariat_box484_ex259a_4_w2SpinningDisc - Red.tif	BOX759
1067	1	593.603	144.904	1	1	1	592	143	596	147	7	4765.31	773.688	1	0	1067	0	1067	MAX_20210209_lariat_box484_ex259a_4_w2SpinningDisc - Red.tif	BOX759
1068	1	594.468	133.5	1	1	1	593	132	596	135	4	1974.33	-44.3333	1	0	1068	0	1068	MAX_20210209_lariat_box484_ex259a_4_w2SpinningDisc - Red.tif	BOX759
1069	1	597.999	115.451	1	1	1	596	113	600	118	8	6161.67	1402.33	1	0	1069	0	1069	MAX_20210209_lariat_box484_ex259a_4_w2SpinningDisc - Red.tif	BOX759
1070	1	598.098	124.666	1	1	1	596	122	600	127	9	6911.67	28	1	0	1070	0	1070	MAX_20210209_lariat_box484_ex259a_4_w2SpinningDisc - Red.tif	BOX759
1071	1	599.057	96.6777	1	1	1	597	94	602	101	14	17278	4781	1	0	1071	0	1071	MAX_20210209_lariat_box484_ex259a_4_w2SpinningDisc - Red.tif	BOX759
1072	1	600.418	76.4962	1	1	1	599	75	602	78	4	1549.67	439.333	1	0	1072	0	1072	MAX_20210209_lariat_box484_ex259a_4_w2SpinningDisc - Red.tif	BOX759
1073	1	601.739	90.7724	1	1	1	600	88	604	93	8	6063.67	935	1	0	1073	0	1073	MAX_20210209_lariat_box484_ex259a_4_w2SpinningDisc - Red.tif	BOX759
1074	1	604.794	112.627	1	1	1	603	110	607	115	9	6564	1911.33	1	0	1074	0	1074	MAX_20210209_lariat_box484_ex259a_4_w2SpinningDisc - Red.tif	BOX759
1075	1	606.373	82.1888	1	1	1	604	80	608	84	6	3133.56	226.438	1	0	1075	0	1075	MAX_20210209_lariat_box484_ex259a_4_w2SpinningDisc - Red.tif	BOX759
1076	1	606.418	235.501	1	1	1	605	234	608	237	4	1406.67	202	1	0	1076	0	1076	MAX_20210209_lariat_box484_ex259a_4_w2SpinningDisc - Red.tif	BOX759
1077	1	610.164	96.1653	1	1	1	608	94	613	100	11	15970.1	6119.27	1	1	1077	1637	1077	MAX_20210209_lariat_box484_ex259a_4_w2SpinningDisc - Red.tif	BOX759
1078	1	611.092	262.286	1	1	1	608	259	615	267	20	25704.2	11548.2	1	1	1078	1638	1078	MAX_20210209_lariat_box484_ex259a_4_w2SpinningDisc - Red.tif	BOX759
1079	1	611.11	86.5783	1	1	1	609	84	613	90	11	12675.5	3414.5	1	1	1079	1639	1079	MAX_20210209_lariat_box484_ex259a_4_w2SpinningDisc - Red.tif	BOX759
1080	1	612.341	105.823	1	1	1	610	104	615	108	9	6312.67	1325.33	1	0	1080	0	1080	MAX_20210209_lariat_box484_ex259a_4_w2SpinningDisc - Red.tif	BOX759
1081	1	616.001	83.5233	1	1	1	614	81	618	86	8	4896	1460.67	1	0	1081	0	1081	MAX_20210209_lariat_box484_ex259a_4_w2SpinningDisc - Red.tif	BOX759
1082	1	617.146	63.0232	1	1	1	615	58	620	67	19	12987.3	4368.71	1	0	1082	0	1082	MAX_20210209_lariat_box484_ex259a_4_w2SpinningDisc - Red.tif	BOX759
1083	1	621.783	52.869	1	1	1	620	51	624	55	8	4219.69	1035.69	1	0	1083	0	1083	MAX_20210209_lariat_box484_ex259a_4_w2SpinningDisc - Red.tif	BOX759
1084	1	624.708	223.227	1	1	1	622	221	628	227	11	10544.1	5576.25	1	1	1084	1641	1084	MAX_20210209_lariat_box484_ex259a_4_w2SpinningDisc - Red.tif	BOX759
1085	1	626.231	230.638	1	1	1	624	228	628	234	11	10666.5	1242.75	1	0	1085	0	1085	MAX_20210209_lariat_box484_ex259a_4_w2SpinningDisc - Red.tif	BOX759
1086	1	627.286	42.3638	1	1	1	625	40	629	46	9	6461.75	4271.25	1	1	1086	1642	1086	MAX_20210209_lariat_box484_ex259a_4_w2SpinningDisc - Red.tif	BOX759
1087	1	629.128	58.5256	1	1	1	625	56	632	61	15	11725	2133	1	0	1087	0	1087	MAX_20210209_lariat_box484_ex259a_4_w2SpinningDisc - Red.tif	BOX759
1088	1	629.49	65.9064	1	1	1	628	64	631	68	6	2112.86	521.857	1	0	1088	0	1088	MAX_20210209_lariat_box484_ex259a_4_w2SpinningDisc - Red.tif	BOX759
1089	1	630.511	198.543	1	1	1	629	197	632	200	4	1254.67	432.667	1	0	1089	0	1089	MAX_20210209_lariat_box484_ex259a_4_w2SpinningDisc - Red.tif	BOX759
1090	1	631.454	39.4537	1	1	1	630	38	633	41	4	2491.67	155	1	0	1090	0	1090	MAX_20210209_lariat_box484_ex259a_4_w2SpinningDisc - Red.tif	BOX759
1091	1	632.875	52.2377	1	1	1	630	50	635	55	11	11004.8	3532.8	1	1	1091	1645	1091	MAX_20210209_lariat_box484_ex259a_4_w2SpinningDisc - Red.tif	BOX759
1092	1	631.965	112.948	1	1	1	630	111	634	115	5	3201	639.812	1	0	1092	0	1092	MAX_20210209_lariat_box484_ex259a_4_w2SpinningDisc - Red.tif	BOX759
1093	1	631.31	121.298	1	1	1	630	120	633	123	3	1289	383	1	0	1093	0	1093	MAX_20210209_lariat_box484_ex259a_4_w2SpinningDisc - Red.tif	BOX759
1094	1	633.587	217.591	1	1	1	630	215	637	222	19	23804.9	11458	1	1	1094	1643	1094	MAX_20210209_lariat_box484_ex259a_4_w2SpinningDisc - Red.tif	BOX759
1095	1	633.919	29.1864	1	1	1	631	27	636	31	9	4891.67	413.667	1	0	1095	0	1095	MAX_20210209_lariat_box484_ex259a_4_w2SpinningDisc - Red.tif	BOX759
1096	1	633.436	226.185	1	1	1	631	224	636	230	14	14268.8	5782.18	1	1	1096	1644	1096	MAX_20210209_lariat_box484_ex259a_4_w2SpinningDisc - Red.tif	BOX759
1097	1	636.078	208.934	1	1	1	634	204	639	214	23	29216	7945.8	1	1	1097	1647	1097	MAX_20210209_lariat_box484_ex259a_4_w2SpinningDisc - Red.tif	BOX759
1098	1	638.529	37.4939	1	1	1	637	36	640	39	4	2041.67	184.667	1	0	1098	0	1098	MAX_20210209_lariat_box484_ex259a_4_w2SpinningDisc - Red.tif	BOX759
1099	1	641.099	198.071	1	1	1	638	195	644	202	14	24765.4	10799.3	1	1	1099	1648	1099	MAX_20210209_lariat_box484_ex259a_4_w2SpinningDisc - Red.tif	BOX759
1100	1	639.582	224.22	1	1	1	638	222	641	226	5	2008.14	1082.86	1	0	1100	0	1100	MAX_20210209_lariat_box484_ex259a_4_w2SpinningDisc - Red.tif	BOX759
1101	1	641.535	174.465	1	1	1	639	172	644	177	12	9726.6	1777.6	1	0	1101	0	1101	MAX_20210209_lariat_box484_ex259a_4_w2SpinningDisc - Red.tif	BOX759
1102	1	641.247	180.527	1	1	1	639	178	643	183	10	5615	1613	1	0	1102	0	1102	MAX_20210209_lariat_box484_ex259a_4_w2SpinningDisc - Red.tif	BOX759
1103	1	642.632	17.3937	1	1	1	640	15	645	20	13	11471.2	3067	1	0	1103	0	1103	MAX_20210209_lariat_box484_ex259a_4_w2SpinningDisc - Red.tif	BOX759
1104	1	641.763	31.1509	1	1	1	640	29	644	33	6	3930.88	794.375	1	0	1104	0	1104	MAX_20210209_lariat_box484_ex259a_4_w2SpinningDisc - Red.tif	BOX759
1105	1	641.487	105.972	1	1	1	640	104	643	108	6	2070.71	470.571	1	0	1105	0	1105	MAX_20210209_lariat_box484_ex259a_4_w2SpinningDisc - Red.tif	BOX759
1106	1	642.453	36.4651	1	1	1	641	35	644	38	4	1426.33	344.333	1	0	1106	0	1106	MAX_20210209_lariat_box484_ex259a_4_w2SpinningDisc - Red.tif	BOX759
1107	1	643.15	158.884	1	1	1	641	157	645	161	8	5141.31	1062.75	1	0	1107	0	1107	MAX_20210209_lariat_box484_ex259a_4_w2SpinningDisc - Red.tif	BOX759
1108	1	645.687	152.562	1	1	1	642	151	649	154	9	4300.2	797.2	1	0	1108	0	1108	MAX_20210209_lariat_box484_ex259a_4_w2SpinningDisc - Red.tif	BOX759
1109	1	646.218	29.8263	1	1	1	644	26	648	33	13	11194.7	2413.91	1	0	1109	0	1109	MAX_20210209_lariat_box484_ex259a_4_w2SpinningDisc - Red.tif	BOX759
1110	1	646.029	132.477	1	1	1	644	130	648	135	8	5558.33	989	1	0	1110	0	1110	MAX_20210209_lariat_box484_ex259a_4_w2SpinningDisc - Red.tif	BOX759
1111	1	647.067	189.555	1	1	1	644	187	650	193	16	44533.3	16470.5	1	1	1111	1649	1111	MAX_20210209_lariat_box484_ex259a_4_w2SpinningDisc - Red.tif	BOX759
1112	1	646.97	43.1787	1	1	1	645	41	649	46	8	5269.67	2133	1	0	1112	0	1112	MAX_20210209_lariat_box484_ex259a_4_w2SpinningDisc - Red.tif	BOX759
1113	1	646.714	139.51	1	1	1	645	136	649	143	9	5231	1953.64	1	0	1113	0	1113	MAX_20210209_lariat_box484_ex259a_4_w2SpinningDisc - Red.tif	BOX759
1114	1	647.342	19.3003	1	1	1	646	18	649	21	3	926.333	672.333	1	0	1114	0	1114	MAX_20210209_lariat_box484_ex259a_4_w2SpinningDisc - Red.tif	BOX759
1115	1	649.316	83.9963	1	1	1	647	82	651	86	7	3029.81	350	1	0	1115	0	1115	MAX_20210209_lariat_box484_ex259a_4_w2SpinningDisc - Red.tif	BOX759
1116	1	650.527	122.46	1	1	1	649	121	652	124	4	1685.33	91.6667	1	0	1116	0	1116	MAX_20210209_lariat_box484_ex259a_4_w2SpinningDisc - Red.tif	BOX759
1117	1	651.866	19.347	1	1	1	650	17	654	22	7	4756.33	2535.67	1	0	1117	0	1117	MAX_20210209_lariat_box484_ex259a_4_w2SpinningDisc - Red.tif	BOX759
1118	1	653.332	144.256	1	1	1	651	141	655	148	14	11111.1	1860.09	1	0	1118	0	1118	MAX_20210209_lariat_box484_ex259a_4_w2SpinningDisc - Red.tif	BOX759
1119	1	652.493	198.525	1	1	1	651	197	654	200	4	773.667	-57.6667	1	0	1119	0	1119	MAX_20210209_lariat_box484_ex259a_4_w2SpinningDisc - Red.tif	BOX759
1120	1	654.555	127.674	1	1	1	652	125	658	130	12	9962.18	1511.91	1	0	1120	0	1120	MAX_20210209_lariat_box484_ex259a_4_w2SpinningDisc - Red.tif	BOX759
1121	1	655.441	166.944	1	1	1	652	164	659	171	19	17694.9	5744	1	0	1121	0	1121	MAX_20210209_lariat_box484_ex259a_4_w2SpinningDisc - Red.tif	BOX759
1122	1	658.078	115.317	1	1	1	656	113	660	118	9	6818	1821.67	1	0	1122	0	1122	MAX_20210209_lariat_box484_ex259a_4_w2SpinningDisc - Red.tif	BOX759
1123	1	659.174	143.804	1	1	1	657	141	662	146	11	13255	1876.2	1	0	1123	0	1123	MAX_20210209_lariat_box484_ex259a_4_w2SpinningDisc - Red.tif	BOX759
1124	1	663.686	96.6329	1	1	1	661	94	666	99	13	16197.4	2236.2	1	0	1124	0	1124	MAX_20210209_lariat_box484_ex259a_4_w2SpinningDisc - Red.tif	BOX759
1125	1	664.004	139.256	1	1	1	662	138	666	141	4	1830.14	594.143	1	0	1125	0	1125	MAX_20210209_lariat_box484_ex259a_4_w2SpinningDisc - Red.tif	BOX759
1126	1	664.284	170.07	1	1	1	662	168	667	172	9	7229.67	947.333	1	0	1126	0	1126	MAX_20210209_lariat_box484_ex259a_4_w2SpinningDisc - Red.tif	BOX759
1127	1	665.48	41.498	1	1	1	664	40	667	43	4	1460.33	180.333	1	0	1127	0	1127	MAX_20210209_lariat_box484_ex259a_4_w2SpinningDisc - Red.tif	BOX759
1128	1	667.049	156.907	1	1	1	664	154	670	160	13	26414.3	8704.04	1	1	1128	1650	1128	MAX_20210209_lariat_box484_ex259a_4_w2SpinningDisc - Red.tif	BOX759
1129	1	669.874	148.249	1	1	1	667	146	672	151	11	10971.4	869.4	1	0	1129	0	1129	MAX_20210209_lariat_box484_ex259a_4_w2SpinningDisc - Red.tif	BOX759
1130	1	670.047	134.304	1	1	1	668	132	672	136	7	4439	22.9375	1	0	1130	0	1130	MAX_20210209_lariat_box484_ex259a_4_w2SpinningDisc - Red.tif	BOX759
1131	1	673.154	86.2069	1	1	1	671	84	675	88	8	3779.5	-396.875	1	0	1131	0	1131	MAX_20210209_lariat_box484_ex259a_4_w2SpinningDisc - Red.tif	BOX759
1132	1	673.654	164.536	1	1	1	671	162	676	168	13	10401.7	3740.73	1	1	1132	1651	1132	MAX_20210209_lariat_box484_ex259a_4_w2SpinningDisc - Red.tif	BOX759
1133	1	674.82	55.2407	1	1	1	673	53	676	57	4	2215.14	482.429	1	0	1133	0	1133	MAX_20210209_lariat_box484_ex259a_4_w2SpinningDisc - Red.tif	BOX759
1134	1	676.156	107.32	1	1	1	674	105	678	110	9	5846.33	696	1	0	1134	0	1134	MAX_20210209_lariat_box484_ex259a_4_w2SpinningDisc - Red.tif	BOX759
1135	1	677.585	93.9274	1	1	1	675	91	680	97	14	13508.8	2454.36	1	0	1135	0	1135	MAX_20210209_lariat_box484_ex259a_4_w2SpinningDisc - Red.tif	BOX759
1136	1	679.555	64.4376	1	1	1	677	62	682	67	12	11197.8	3710.8	1	1	1136	1652	1136	MAX_20210209_lariat_box484_ex259a_4_w2SpinningDisc - Red.tif	BOX759
1137	1	679.003	116.959	1	1	1	677	115	681	119	9	7484.56	1378.75	1	0	1137	0	1137	MAX_20210209_lariat_box484_ex259a_4_w2SpinningDisc - Red.tif	BOX759
1138	1	680.48	51.4431	1	1	1	679	50	682	53	4	1109.67	613.667	1	0	1138	0	1138	MAX_20210209_lariat_box484_ex259a_4_w2SpinningDisc - Red.tif	BOX759
1139	1	682.934	77.3005	1	1	1	681	75	685	79	7	4818.62	675.562	1	0	1139	0	1139	MAX_20210209_lariat_box484_ex259a_4_w2SpinningDisc - Red.tif	BOX759
1140	1	682	87.5334	1	1	1	681	85	683	90	4	870.429	381.143	1	0	1140	0	1140	MAX_20210209_lariat_box484_ex259a_4_w2SpinningDisc - Red.tif	BOX759
1141	1	682.502	129.467	1	1	1	681	128	684	131	4	1492.67	7.66667	1	0	1141	0	1141	MAX_20210209_lariat_box484_ex259a_4_w2SpinningDisc - Red.tif	BOX759
1142	1	683.445	123.45	1	1	1	682	122	685	125	4	1591.33	228.667	1	0	1142	0	1142	MAX_20210209_lariat_box484_ex259a_4_w2SpinningDisc - Red.tif	BOX759
1143	1	690.609	43.9141	1	1	1	686	42	695	47	19	26225	9019.29	1	1	1143	1653	1143	MAX_20210209_lariat_box484_ex259a_4_w2SpinningDisc - Red.tif	BOX759
1144	1	689.825	103.284	1	1	1	687	101	692	106	12	12188.2	2917.8	1	0	1144	0	1144	MAX_20210209_lariat_box484_ex259a_4_w2SpinningDisc - Red.tif	BOX759
1145	1	689.02	129.986	1	1	1	687	128	691	132	9	5637.31	1009.31	1	0	1145	0	1145	MAX_20210209_lariat_box484_ex259a_4_w2SpinningDisc - Red.tif	BOX759
1146	1	690.219	122.346	1	1	1	688	120	692	125	9	7271.67	1735.33	1	0	1146	0	1146	MAX_20210209_lariat_box484_ex259a_4_w2SpinningDisc - Red.tif	BOX759
1147	1	691.333	33.1086	1	1	1	689	31	694	35	9	5145.33	1400.33	1	0	1147	0	1147	MAX_20210209_lariat_box484_ex259a_4_w2SpinningDisc - Red.tif	BOX759
1148	1	691.806	52.1508	1	1	1	689	50	694	55	11	11151.6	2877.2	1	0	1148	0	1148	MAX_20210209_lariat_box484_ex259a_4_w2SpinningDisc - Red.tif	BOX759
1149	1	691.954	115.308	1	1	1	689	112	695	119	15	28879.3	12439.8	1	1	1149	1654	1149	MAX_20210209_lariat_box484_ex259a_4_w2SpinningDisc - Red.tif	BOX759
1150	1	693.212	20.9652	1	1	1	692	19	695	23	4	2437.29	249.714	1	0	1150	0	1150	MAX_20210209_lariat_box484_ex259a_4_w2SpinningDisc - Red.tif	BOX759
1151	1	694.061	80.4908	1	1	1	692	79	696	82	6	1856.71	-126.286	1	0	1151	0	1151	MAX_20210209_lariat_box484_ex259a_4_w2SpinningDisc - Red.tif	BOX759
1152	1	694.775	120.972	1	1	1	693	119	697	124	9	9052.67	4767.67	1	1	1152	1655	1152	MAX_20210209_lariat_box484_ex259a_4_w2SpinningDisc - Red.tif	BOX759
1153	1	696.327	14.9855	1	1	1	694	13	698	17	7	3926.12	384.312	1	0	1153	0	1153	MAX_20210209_lariat_box484_ex259a_4_w2SpinningDisc - Red.tif	BOX759
1154	1	695.485	85.4819	1	1	1	694	84	697	87	4	1770.33	287.333	1	0	1154	0	1154	MAX_20210209_lariat_box484_ex259a_4_w2SpinningDisc - Red.tif	BOX759
1155	1	700.172	28.397	1	1	1	698	27	702	30	5	2783.57	0.85714	1	0	1155	0	1155	MAX_20210209_lariat_box484_ex259a_4_w2SpinningDisc - Red.tif	BOX759
1156	1	700.485	84.4981	1	1	1	698	82	703	88	12	24915.9	7689.36	1	1	1156	1656	1156	MAX_20210209_lariat_box484_ex259a_4_w2SpinningDisc - Red.tif	BOX759
1157	1	703.11	18.9436	1	1	1	701	16	706	22	12	14737.8	2860.91	1	0	1157	0	1157	MAX_20210209_lariat_box484_ex259a_4_w2SpinningDisc - Red.tif	BOX759
1158	1	703.538	52.9968	1	1	1	701	51	706	55	8	7395	1067	1	0	1158	0	1158	MAX_20210209_lariat_box484_ex259a_4_w2SpinningDisc - Red.tif	BOX759
1159	1	703.399	71.2228	1	1	1	702	69	705	74	7	3970.5	944	1	0	1159	0	1159	MAX_20210209_lariat_box484_ex259a_4_w2SpinningDisc - Red.tif	BOX759
1160	1	705.275	30.3388	1	1	1	703	28	708	33	13	16612.8	2494	1	0	1160	0	1160	MAX_20210209_lariat_box484_ex259a_4_w2SpinningDisc - Red.tif	BOX759
1161	1	705.497	98.4681	1	1	1	703	97	708	100	8	3409	371	1	0	1161	0	1161	MAX_20210209_lariat_box484_ex259a_4_w2SpinningDisc - Red.tif	BOX759
1162	1	705.259	85.6329	1	1	1	704	84	707	87	3	1095.67	-4.66667	1	0	1162	0	1162	MAX_20210209_lariat_box484_ex259a_4_w2SpinningDisc - Red.tif	BOX759
1163	1	705.972	92.4703	1	1	1	704	91	708	94	6	2474.57	813.143	1	0	1163	0	1163	MAX_20210209_lariat_box484_ex259a_4_w2SpinningDisc - Red.tif	BOX759
1164	1	712.316	84.4868	1	1	1	711	82	714	87	6	3364.5	496.5	1	0	1164	0	1164	MAX_20210209_lariat_box484_ex259a_4_w2SpinningDisc - Red.tif	BOX759
1165	1	713.812	23.1615	1	1	1	712	21	716	25	6	3565.88	953.562	1	0	1165	0	1165	MAX_20210209_lariat_box484_ex259a_4_w2SpinningDisc - Red.tif	BOX759
1166	1	714.356	70.3294	1	1	1	713	69	716	72	3	1567	-10.3333	1	0	1166	0	1166	MAX_20210209_lariat_box484_ex259a_4_w2SpinningDisc - Red.tif	BOX759
1167	1	715.698	80.2804	1	1	1	713	78	718	83	10	12208.6	5741.4	1	1	1167	1658	1167	MAX_20210209_lariat_box484_ex259a_4_w2SpinningDisc - Red.tif	BOX759
1168	1	719.108	31.3151	1	1	1	717	29	721	34	9	9426.33	1858.33	1	0	1168	0	1168	MAX_20210209_lariat_box484_ex259a_4_w2SpinningDisc - Red.tif	BOX759
1169	1	718.385	41.1966	1	1	1	717	39	720	45	5	2911.11	1783.89	1	1	1169	1659	1169	MAX_20210209_lariat_box484_ex259a_4_w2SpinningDisc - Red.tif	BOX759
1170	1	718.694	48.0406	1	1	1	717	46	721	50	7	3687.81	838.875	1	0	1170	0	1170	MAX_20210209_lariat_box484_ex259a_4_w2SpinningDisc - Red.tif	BOX759
1171	1	720.599	57.9841	1	1	1	717	55	724	62	18	63803.3	26412.9	1	1	1171	1660	1171	MAX_20210209_lariat_box484_ex259a_4_w2SpinningDisc - Red.tif	BOX759
1172	1	719.712	69.2194	1	1	1	718	67	722	72	8	5588.33	1734.33	1	0	1172	0	1172	MAX_20210209_lariat_box484_ex259a_4_w2SpinningDisc - Red.tif	BOX759
1173	1	722.268	39.0108	1	1	1	720	37	724	41	7	4406.06	1355.69	1	0	1173	0	1173	MAX_20210209_lariat_box484_ex259a_4_w2SpinningDisc - Red.tif	BOX759
1174	1	727.704	38.4155	1	1	1	726	37	730	40	5	3553.29	630.143	1	0	1174	0	1174	MAX_20210209_lariat_box484_ex259a_4_w2SpinningDisc - Red.tif	BOX759
1175	1	734.507	13.4511	1	1	1	733	12	736	15	4	1303.33	213	1	0	1175	0	1175	MAX_20210209_lariat_box484_ex259a_4_w2SpinningDisc - Red.tif	BOX759
1176	2	213.357	920.771	2	1	1	211	917	216	923	5	13731.9	4624	1	1	7	1176	1176	MAX_20210209_lariat_box484_ex259a_4_w2SpinningDisc - Red.tif	BOX759
1177	2	219.537	890.38	2	1	1	217	887	222	893	8	24353	9059	1	1	16	1177	1177	MAX_20210209_lariat_box484_ex259a_4_w2SpinningDisc - Red.tif	BOX759
1178	2	219	989.932	2	1	1	216	987	221	992	3	7325	4080.2	1	1	15	1178	1178	MAX_20210209_lariat_box484_ex259a_4_w2SpinningDisc - Red.tif	BOX759
1179	2	222.922	945.843	2	1	1	220	940	226	949	12	43425	14283.3	1	1	19	1179	1179	MAX_20210209_lariat_box484_ex259a_4_w2SpinningDisc - Red.tif	BOX759
1180	2	222	966.943	2	1	1	220	963	224	970	3	9743.55	5701.45	1	1	20	1180	1180	MAX_20210209_lariat_box484_ex259a_4_w2SpinningDisc - Red.tif	BOX759
1181	2	225.311	751.69	2	1	1	223	749	227	753	3	4248.19	2617.06	1	1	23	1181	1181	MAX_20210209_lariat_box484_ex259a_4_w2SpinningDisc - Red.tif	BOX759
1182	2	225.376	830.134	2	1	1	223	824	227	833	5	13092.8	5730.77	1	1	24	1182	1182	MAX_20210209_lariat_box484_ex259a_4_w2SpinningDisc - Red.tif	BOX759
1183	2	226.883	904.024	2	1	1	224	901	229	907	9	20194.6	8582.55	1	1	27	1183	1183	MAX_20210209_lariat_box484_ex259a_4_w2SpinningDisc - Red.tif	BOX759
1184	2	228.511	714.017	2	1	1	226	709	231	717	6	20145.2	8628.15	1	1	28	1184	1184	MAX_20210209_lariat_box484_ex259a_4_w2SpinningDisc - Red.tif	BOX759
1185	2	229.406	808.917	2	1	1	227	806	232	812	13	41885.1	13946.4	1	1	33	1185	1185	MAX_20210209_lariat_box484_ex259a_4_w2SpinningDisc - Red.tif	BOX759
1186	2	228.28	816.314	2	1	1	226	813	230	819	3	9276.75	3426.5	1	1	30	1186	1186	MAX_20210209_lariat_box484_ex259a_4_w2SpinningDisc - Red.tif	BOX759
1187	2	230.081	700.821	2	1	1	227	698	232	703	8	13507.4	5373.8	1	1	32	1187	1187	MAX_20210209_lariat_box484_ex259a_4_w2SpinningDisc - Red.tif	BOX759
1188	2	230.527	687.976	2	1	1	228	684	233	690	6	13651.9	4739.18	1	1	35	1188	1188	MAX_20210209_lariat_box484_ex259a_4_w2SpinningDisc - Red.tif	BOX759
1189	2	232.382	785.74	2	1	1	230	782	234	788	5	14193	5275	1	1	38	1189	1189	MAX_20210209_lariat_box484_ex259a_4_w2SpinningDisc - Red.tif	BOX759
1190	2	233.118	855.346	2	1	1	231	852	236	859	13	39317	18349	1	1	43	1190	1190	MAX_20210209_lariat_box484_ex259a_4_w2SpinningDisc - Red.tif	BOX759
1191	2	232.614	905.763	2	1	1	231	902	235	908	5	9749	5062	1	1	45	1191	1191	MAX_20210209_lariat_box484_ex259a_4_w2SpinningDisc - Red.tif	BOX759
1192	2	233.873	760.296	2	1	1	231	757	236	763	9	20135.4	6391.18	1	1	40	1192	1192	MAX_20210209_lariat_box484_ex259a_4_w2SpinningDisc - Red.tif	BOX759
1193	2	234.785	745.975	2	1	1	232	742	237	748	4	15664.1	3745.09	1	1	47	1193	1193	MAX_20210209_lariat_box484_ex259a_4_w2SpinningDisc - Red.tif	BOX759
1194	2	240.127	970.565	2	1	1	238	964	243	974	7	19105.2	9879.4	1	1	63	1194	1194	MAX_20210209_lariat_box484_ex259a_4_w2SpinningDisc - Red.tif	BOX759
1195	2	244.229	617.914	2	1	1	242	615	246	620	4	7381	4080.33	1	1	66	1195	1195	MAX_20210209_lariat_box484_ex259a_4_w2SpinningDisc - Red.tif	BOX759
1196	2	244.309	692.301	2	1	1	242	688	246	694	3	9865.5	3469.75	1	1	67	1196	1196	MAX_20210209_lariat_box484_ex259a_4_w2SpinningDisc - Red.tif	BOX759
1197	2	244	871.968	2	1	1	242	868	246	875	3	22376	5782	1	1	68	1197	1197	MAX_20210209_lariat_box484_ex259a_4_w2SpinningDisc - Red.tif	BOX759
1198	2	245.635	857.133	2	1	1	244	854	248	860	5	13928	3801.75	1	1	74	1198	1198	MAX_20210209_lariat_box484_ex259a_4_w2SpinningDisc - Red.tif	BOX759
1199	2	246.554	632.46	2	1	1	244	629	252	634	4	19879.8	4194	1	1	72	1199	1199	MAX_20210209_lariat_box484_ex259a_4_w2SpinningDisc - Red.tif	BOX759
1200	2	247	784.883	2	1	1	245	780	249	788	5	11064.1	6150.5	1	1	76	1200	1200	MAX_20210209_lariat_box484_ex259a_4_w2SpinningDisc - Red.tif	BOX759
1201	2	249.613	701.678	2	1	1	247	698	252	704	7	15433.1	6468.36	1	1	79	1201	1201	MAX_20210209_lariat_box484_ex259a_4_w2SpinningDisc - Red.tif	BOX759
1202	2	249.642	946.571	2	1	1	248	943	252	949	7	9416.5	4317.25	1	1	83	1202	1202	MAX_20210209_lariat_box484_ex259a_4_w2SpinningDisc - Red.tif	BOX759
1203	2	250.528	989.678	2	1	1	248	986	253	993	9	25768	7839	1	1	84	1203	1203	MAX_20210209_lariat_box484_ex259a_4_w2SpinningDisc - Red.tif	BOX759
1204	2	251.488	769.493	2	1	1	249	766	254	772	8	24975.2	8391.36	1	1	87	1204	1204	MAX_20210209_lariat_box484_ex259a_4_w2SpinningDisc - Red.tif	BOX759
1205	2	253.578	603.666	2	1	1	251	600	256	607	14	60315	25951	1	1	90	1205	1205	MAX_20210209_lariat_box484_ex259a_4_w2SpinningDisc - Red.tif	BOX759
1206	2	252.436	860.437	2	1	1	250	857	254	863	4	10174.5	4331	1	1	88	1206	1206	MAX_20210209_lariat_box484_ex259a_4_w2SpinningDisc - Red.tif	BOX759
1207	2	254.12	686.119	2	1	1	251	683	257	689	11	34510.8	14395.3	1	1	91	1207	1207	MAX_20210209_lariat_box484_ex259a_4_w2SpinningDisc - Red.tif	BOX759
1208	2	254.517	593.486	2	1	1	251	590	257	596	4	14589.5	3707	1	1	89	1208	1208	MAX_20210209_lariat_box484_ex259a_4_w2SpinningDisc - Red.tif	BOX759
1209	2	256.179	641.95	2	1	1	253	638	259	645	12	31365.8	13798.2	1	1	96	1209	1209	MAX_20210209_lariat_box484_ex259a_4_w2SpinningDisc - Red.tif	BOX759
1210	2	256.146	740.363	2	1	1	254	737	259	743	11	24375.5	12682.3	1	1	100	1210	1210	MAX_20210209_lariat_box484_ex259a_4_w2SpinningDisc - Red.tif	BOX759
1211	2	258.554	851.793	2	1	1	256	849	261	854	5	15522.2	5213.2	1	1	107	1211	1211	MAX_20210209_lariat_box484_ex259a_4_w2SpinningDisc - Red.tif	BOX759
1212	2	260.101	612.656	2	1	1	258	609	262	615	9	21291.2	6284	1	1	113	1212	1212	MAX_20210209_lariat_box484_ex259a_4_w2SpinningDisc - Red.tif	BOX759
1213	2	260.101	673.311	2	1	1	257	670	262	676	9	16125.6	8100	1	1	110	1213	1213	MAX_20210209_lariat_box484_ex259a_4_w2SpinningDisc - Red.tif	BOX759
1214	2	261.188	597.521	2	1	1	259	591	264	600	10	37416.3	11624.6	1	1	116	1214	1214	MAX_20210209_lariat_box484_ex259a_4_w2SpinningDisc - Red.tif	BOX759
1215	2	260.342	789.266	2	1	1	258	785	262	793	7	22377.8	7163.62	1	1	115	1215	1215	MAX_20210209_lariat_box484_ex259a_4_w2SpinningDisc - Red.tif	BOX759
1216	2	263.66	677.709	2	1	1	261	674	265	679	3	7463	1700.33	1	1	123	1216	1216	MAX_20210209_lariat_box484_ex259a_4_w2SpinningDisc - Red.tif	BOX759
1217	2	263.679	685.214	2	1	1	261	682	266	688	8	18967.8	7023.36	1	1	124	1217	1217	MAX_20210209_lariat_box484_ex259a_4_w2SpinningDisc - Red.tif	BOX759
1218	2	265.166	573.84	2	1	1	262	569	267	576	8	18031	5447	1	1	128	1218	1218	MAX_20210209_lariat_box484_ex259a_4_w2SpinningDisc - Red.tif	BOX759
1219	2	265.142	793.778	2	1	1	263	790	268	796	6	18701.5	6520.27	1	1	132	1219	1219	MAX_20210209_lariat_box484_ex259a_4_w2SpinningDisc - Red.tif	BOX759
1220	2	265.554	925.975	2	1	1	264	923	268	930	6	13189.2	6361.27	1	1	140	1220	1220	MAX_20210209_lariat_box484_ex259a_4_w2SpinningDisc - Red.tif	BOX759
1221	2	267.366	562.412	2	1	1	265	559	270	565	11	29299.4	12239.5	1	1	141	1221	1221	MAX_20210209_lariat_box484_ex259a_4_w2SpinningDisc - Red.tif	BOX759
1222	2	266.63	631.156	2	1	1	264	628	269	634	5	13274.1	6755.27	1	1	137	1222	1222	MAX_20210209_lariat_box484_ex259a_4_w2SpinningDisc - Red.tif	BOX759
1223	2	268.865	625.171	2	1	1	266	622	272	628	11	16044.6	13810.7	1	1	149	1223	1223	MAX_20210209_lariat_box484_ex259a_4_w2SpinningDisc - Red.tif	BOX759
1224	2	268.4	716.172	2	1	1	265	712	271	719	9	33539.5	9861.62	1	1	144	1224	1224	MAX_20210209_lariat_box484_ex259a_4_w2SpinningDisc - Red.tif	BOX759
1225	2	268.884	540.259	2	1	1	266	537	271	543	9	23597.5	10409.7	1	1	147	1225	1225	MAX_20210209_lariat_box484_ex259a_4_w2SpinningDisc - Red.tif	BOX759
1226	2	269.765	638.987	2	1	1	267	636	272	641	4	9501.2	3756	1	1	150	1226	1226	MAX_20210209_lariat_box484_ex259a_4_w2SpinningDisc - Red.tif	BOX759
1227	2	269.432	984.695	2	1	1	267	982	272	989	9	21411	10639	1	1	153	1227	1227	MAX_20210209_lariat_box484_ex259a_4_w2SpinningDisc - Red.tif	BOX759
1228	2	270.975	675.463	2	1	1	269	672	273	678	8	14023	5194.25	1	1	159	1228	1228	MAX_20210209_lariat_box484_ex259a_4_w2SpinningDisc - Red.tif	BOX759
1229	2	270.731	747.513	2	1	1	268	743	273	752	4	22789.3	9605.43	1	1	156	1229	1229	MAX_20210209_lariat_box484_ex259a_4_w2SpinningDisc - Red.tif	BOX759
1230	2	270.885	974.645	2	1	1	268	971	273	979	9	22133.8	9862.15	1	1	157	1230	1230	MAX_20210209_lariat_box484_ex259a_4_w2SpinningDisc - Red.tif	BOX759
1231	2	271.71	772.752	2	1	1	269	770	274	775	8	21258.6	7949.6	1	1	160	1231	1231	MAX_20210209_lariat_box484_ex259a_4_w2SpinningDisc - Red.tif	BOX759
1232	2	272.329	802.723	2	1	1	270	800	275	806	14	63198.9	27089.2	1	1	162	1232	1232	MAX_20210209_lariat_box484_ex259a_4_w2SpinningDisc - Red.tif	BOX759
1233	2	273.555	533.416	2	1	1	271	530	276	536	12	27106.8	14902.7	1	1	164	1233	1233	MAX_20210209_lariat_box484_ex259a_4_w2SpinningDisc - Red.tif	BOX759
1234	2	273.28	780.153	2	1	1	270	777	277	782	10	24002	7964	1	1	161	1234	1234	MAX_20210209_lariat_box484_ex259a_4_w2SpinningDisc - Red.tif	BOX759
1235	2	274.098	568.256	2	1	1	271	564	277	571	9	27090.6	8958.38	1	1	165	1235	1235	MAX_20210209_lariat_box484_ex259a_4_w2SpinningDisc - Red.tif	BOX759
1236	2	273.495	699.455	2	1	1	271	696	276	702	4	13623.9	4119	1	1	166	1236	1236	MAX_20210209_lariat_box484_ex259a_4_w2SpinningDisc - Red.tif	BOX759
1237	2	273.715	905.435	2	1	1	272	902	276	909	6	11248.4	5465.91	1	1	171	1237	1237	MAX_20210209_lariat_box484_ex259a_4_w2SpinningDisc - Red.tif	BOX759
1238	2	275.095	582.686	2	1	1	272	579	277	585	9	22749.5	7105.36	1	1	167	1238	1238	MAX_20210209_lariat_box484_ex259a_4_w2SpinningDisc - Red.tif	BOX759
1239	2	274.788	602.964	2	1	1	272	599	277	605	4	11646.6	4862.55	1	1	168	1239	1239	MAX_20210209_lariat_box484_ex259a_4_w2SpinningDisc - Red.tif	BOX759
1240	2	274.515	788.973	2	1	1	272	785	277	791	6	15915.1	6371	1	1	169	1240	1240	MAX_20210209_lariat_box484_ex259a_4_w2SpinningDisc - Red.tif	BOX759
1241	2	276.783	705.272	2	1	1	274	702	279	708	12	30839	15638.7	1	1	175	1241	1241	MAX_20210209_lariat_box484_ex259a_4_w2SpinningDisc - Red.tif	BOX759
1242	2	276.345	525.151	2	1	1	274	521	278	527	5	11511.2	4218.5	1	1	174	1242	1242	MAX_20210209_lariat_box484_ex259a_4_w2SpinningDisc - Red.tif	BOX759
1243	2	278.154	653.243	2	1	1	275	650	280	656	11	15284.9	9946.27	1	1	178	1243	1243	MAX_20210209_lariat_box484_ex259a_4_w2SpinningDisc - Red.tif	BOX759
1244	2	279.009	551.432	2	1	1	276	548	281	554	8	16710	6571.82	1	1	180	1244	1244	MAX_20210209_lariat_box484_ex259a_4_w2SpinningDisc - Red.tif	BOX759
1245	2	280.242	596.172	2	1	1	278	592	282	599	8	16442.3	7173.73	1	1	188	1245	1245	MAX_20210209_lariat_box484_ex259a_4_w2SpinningDisc - Red.tif	BOX759
1246	2	279	670.524	2	1	1	277	666	281	673	4	13828	5165.45	1	1	185	1246	1246	MAX_20210209_lariat_box484_ex259a_4_w2SpinningDisc - Red.tif	BOX759
1247	2	279.586	890.477	2	1	1	277	885	282	896	12	39491	16682.5	1	1	187	1247	1247	MAX_20210209_lariat_box484_ex259a_4_w2SpinningDisc - Red.tif	BOX759
1248	2	280.486	507.947	2	1	1	279	504	283	510	6	8571.5	4163.25	1	1	189	1248	1248	MAX_20210209_lariat_box484_ex259a_4_w2SpinningDisc - Red.tif	BOX759
1249	2	282.283	641.464	2	1	1	279	637	284	644	6	19015	5370	1	1	190	1249	1249	MAX_20210209_lariat_box484_ex259a_4_w2SpinningDisc - Red.tif	BOX759
1250	2	282.813	943.8	2	1	1	281	940	286	949	16	35344.6	20827.7	1	1	195	1250	1250	MAX_20210209_lariat_box484_ex259a_4_w2SpinningDisc - Red.tif	BOX759
1251	2	283.498	686.897	2	1	1	281	683	285	689	6	12036.8	4884.75	1	1	194	1251	1251	MAX_20210209_lariat_box484_ex259a_4_w2SpinningDisc - Red.tif	BOX759
1252	2	287.655	535.237	2	1	1	285	531	291	541	10	42716.6	17399.1	1	1	200	1252	1252	MAX_20210209_lariat_box484_ex259a_4_w2SpinningDisc - Red.tif	BOX759
1253	2	287.646	565.399	2	1	1	285	562	290	568	11	24505.5	8139.27	1	1	202	1253	1253	MAX_20210209_lariat_box484_ex259a_4_w2SpinningDisc - Red.tif	BOX759
1254	2	287.508	817.503	2	1	1	285	814	290	823	12	35101.6	17807.6	1	1	203	1254	1254	MAX_20210209_lariat_box484_ex259a_4_w2SpinningDisc - Red.tif	BOX759
1255	2	288.686	498.336	2	1	1	286	495	291	501	13	42352.6	17168.9	1	1	204	1255	1255	MAX_20210209_lariat_box484_ex259a_4_w2SpinningDisc - Red.tif	BOX759
1256	2	290.613	520.384	2	1	1	288	517	293	523	11	31393.1	14102.6	1	1	209	1256	1256	MAX_20210209_lariat_box484_ex259a_4_w2SpinningDisc - Red.tif	BOX759
1257	2	290.852	657.028	2	1	1	288	654	293	660	9	17272.7	8280.73	1	1	212	1257	1257	MAX_20210209_lariat_box484_ex259a_4_w2SpinningDisc - Red.tif	BOX759
1258	2	291.668	648.134	2	1	1	289	644	294	651	8	18553	7900	1	1	215	1258	1258	MAX_20210209_lariat_box484_ex259a_4_w2SpinningDisc - Red.tif	BOX759
1259	2	291.483	681.929	2	1	1	289	678	293	684	6	11400.8	3588.5	1	1	216	1259	1259	MAX_20210209_lariat_box484_ex259a_4_w2SpinningDisc - Red.tif	BOX759
1260	2	293.149	696.416	2	1	1	291	692	295	699	7	11041.4	6218.27	1	1	223	1260	1260	MAX_20210209_lariat_box484_ex259a_4_w2SpinningDisc - Red.tif	BOX759
1261	2	293.946	567.21	2	1	1	291	563	296	571	10	24229.2	12055.4	1	1	222	1261	1261	MAX_20210209_lariat_box484_ex259a_4_w2SpinningDisc - Red.tif	BOX759
1262	2	293.541	627.722	2	1	1	290	622	296	632	9	29069.5	9802.38	1	1	218	1262	1262	MAX_20210209_lariat_box484_ex259a_4_w2SpinningDisc - Red.tif	BOX759
1263	2	296.504	592.249	2	1	1	294	588	299	595	10	18500	10555	1	1	232	1263	1263	MAX_20210209_lariat_box484_ex259a_4_w2SpinningDisc - Red.tif	BOX759
1264	2	297.404	472.007	2	1	1	294	468	300	475	16	63994.4	28157.5	1	1	231	1264	1264	MAX_20210209_lariat_box484_ex259a_4_w2SpinningDisc - Red.tif	BOX759
1265	2	298.18	803.476	2	1	1	296	800	301	808	14	30034.5	16250.8	1	1	241	1265	1265	MAX_20210209_lariat_box484_ex259a_4_w2SpinningDisc - Red.tif	BOX759
1266	2	301	450.078	2	1	1	299	446	303	452	3	8050	4196.5	1	1	244	1266	1266	MAX_20210209_lariat_box484_ex259a_4_w2SpinningDisc - Red.tif	BOX759
1267	2	301.954	497.008	2	1	1	300	493	304	499	5	13789	4272.75	1	1	247	1267	1267	MAX_20210209_lariat_box484_ex259a_4_w2SpinningDisc - Red.tif	BOX759
1268	2	301.788	539.92	2	1	1	300	536	304	542	4	13582.8	4284.75	1	1	249	1268	1268	MAX_20210209_lariat_box484_ex259a_4_w2SpinningDisc - Red.tif	BOX759
1269	2	302.32	625.767	2	1	1	299	622	305	628	8	16112.5	8222.46	1	1	245	1269	1269	MAX_20210209_lariat_box484_ex259a_4_w2SpinningDisc - Red.tif	BOX759
1270	2	302.189	677.601	2	1	1	299	674	304	683	9	23028.4	11267.3	1	1	246	1270	1270	MAX_20210209_lariat_box484_ex259a_4_w2SpinningDisc - Red.tif	BOX759
1271	2	305.211	691.446	2	1	1	303	688	307	694	10	17827	9027.25	1	1	260	1271	1271	MAX_20210209_lariat_box484_ex259a_4_w2SpinningDisc - Red.tif	BOX759
1272	2	304.859	718.78	2	1	1	302	716	307	721	6	16998.2	4842.8	1	1	255	1272	1272	MAX_20210209_lariat_box484_ex259a_4_w2SpinningDisc - Red.tif	BOX759
1273	2	305.014	742.665	2	1	1	303	739	307	745	7	10941.2	4119.75	1	1	261	1273	1273	MAX_20210209_lariat_box484_ex259a_4_w2SpinningDisc - Red.tif	BOX759
1274	2	305.333	556.695	2	1	1	303	553	308	559	5	11583.2	5393.27	1	1	258	1274	1274	MAX_20210209_lariat_box484_ex259a_4_w2SpinningDisc - Red.tif	BOX759
1275	2	305.84	588.597	2	1	1	304	585	308	591	5	10961.8	4867.25	1	1	265	1275	1275	MAX_20210209_lariat_box484_ex259a_4_w2SpinningDisc - Red.tif	BOX759
1276	2	305.41	767.279	2	1	1	303	764	308	770	7	17567.3	7181.45	1	1	262	1276	1276	MAX_20210209_lariat_box484_ex259a_4_w2SpinningDisc - Red.tif	BOX759
1277	2	308.006	497.697	2	1	1	305	494	310	500	7	15874.2	5411.18	1	1	268	1277	1277	MAX_20210209_lariat_box484_ex259a_4_w2SpinningDisc - Red.tif	BOX759
1278	2	308.154	650.048	2	1	1	305	646	310	653	9	21970	7844	1	1	269	1278	1278	MAX_20210209_lariat_box484_ex259a_4_w2SpinningDisc - Red.tif	BOX759
1279	2	308.846	516.309	2	1	1	307	512	311	519	9	15220.5	7142.55	1	1	274	1279	1279	MAX_20210209_lariat_box484_ex259a_4_w2SpinningDisc - Red.tif	BOX759
1280	2	309.329	471.287	2	1	1	307	468	311	473	3	8118	3081	1	1	273	1280	1280	MAX_20210209_lariat_box484_ex259a_4_w2SpinningDisc - Red.tif	BOX759
1281	2	309.481	730.51	2	1	1	307	727	312	733	4	14986.5	4701.55	1	1	275	1281	1281	MAX_20210209_lariat_box484_ex259a_4_w2SpinningDisc - Red.tif	BOX759
1282	2	311.511	641.417	2	1	1	309	638	314	643	4	12054.2	3054.4	1	1	278	1282	1282	MAX_20210209_lariat_box484_ex259a_4_w2SpinningDisc - Red.tif	BOX759
1283	2	311.578	764.253	2	1	1	309	761	314	767	7	14779.1	6553.55	1	1	282	1283	1283	MAX_20210209_lariat_box484_ex259a_4_w2SpinningDisc - Red.tif	BOX759
1284	2	313.714	481.597	2	1	1	311	478	316	484	10	26488.8	10501.1	1	1	285	1284	1284	MAX_20210209_lariat_box484_ex259a_4_w2SpinningDisc - Red.tif	BOX759
1285	2	312.664	651.596	2	1	1	310	647	315	654	8	19528	7475	1	1	284	1285	1285	MAX_20210209_lariat_box484_ex259a_4_w2SpinningDisc - Red.tif	BOX759
1286	2	313.343	739.067	2	1	1	311	735	315	742	6	11887.1	5818.55	1	1	288	1286	1286	MAX_20210209_lariat_box484_ex259a_4_w2SpinningDisc - Red.tif	BOX759
1287	2	313.485	778.435	2	1	1	312	776	315	781	8	5403.5	3600	0	1	0	1287	1287	MAX_20210209_lariat_box484_ex259a_4_w2SpinningDisc - Red.tif	BOX759
1288	2	314.993	431.421	2	1	1	312	428	318	434	8	16899.9	8815.12	1	1	290	1288	1288	MAX_20210209_lariat_box484_ex259a_4_w2SpinningDisc - Red.tif	BOX759
1289	2	317.479	686.854	2	1	1	315	683	320	690	14	41554	16880	1	1	297	1289	1289	MAX_20210209_lariat_box484_ex259a_4_w2SpinningDisc - Red.tif	BOX759
1290	2	316.647	772.41	2	1	1	315	770	319	775	7	4142.67	5713.67	0	1	0	1290	1290	MAX_20210209_lariat_box484_ex259a_4_w2SpinningDisc - Red.tif	BOX759
1291	2	317.674	819.198	2	1	1	316	816	320	822	5	9691.75	5219	1	1	302	1291	1291	MAX_20210209_lariat_box484_ex259a_4_w2SpinningDisc - Red.tif	BOX759
1292	2	318.98	568.523	2	1	1	316	564	322	571	8	25759.5	7510.54	1	1	299	1292	1292	MAX_20210209_lariat_box484_ex259a_4_w2SpinningDisc - Red.tif	BOX759
1293	2	318.226	615.868	2	1	1	316	612	320	618	4	15362.8	4811.25	1	1	300	1293	1293	MAX_20210209_lariat_box484_ex259a_4_w2SpinningDisc - Red.tif	BOX759
1294	2	319.616	593.166	2	1	1	317	589	322	595	5	8328.18	5010.45	1	1	305	1294	1294	MAX_20210209_lariat_box484_ex259a_4_w2SpinningDisc - Red.tif	BOX759
1295	2	320.874	890.324	2	1	1	319	887	324	894	9	19870	9446	1	1	309	1295	1295	MAX_20210209_lariat_box484_ex259a_4_w2SpinningDisc - Red.tif	BOX759
1296	2	324.161	653.854	2	1	1	321	650	326	657	10	16319	7930	1	1	312	1296	1296	MAX_20210209_lariat_box484_ex259a_4_w2SpinningDisc - Red.tif	BOX759
1297	2	323.644	908.683	2	1	1	321	906	325	911	3	6883	2940.33	1	1	313	1297	1297	MAX_20210209_lariat_box484_ex259a_4_w2SpinningDisc - Red.tif	BOX759
1298	2	323.227	989.931	2	1	1	321	987	325	994	4	13630.2	5131.27	1	1	314	1298	1298	MAX_20210209_lariat_box484_ex259a_4_w2SpinningDisc - Red.tif	BOX759
1299	2	325	525.915	2	1	1	323	522	328	528	3	15758.7	3793.36	1	1	321	1299	1299	MAX_20210209_lariat_box484_ex259a_4_w2SpinningDisc - Red.tif	BOX759
1300	2	327.029	596.797	2	1	1	325	593	330	599	10	25895.2	8098	1	1	336	1300	1300	MAX_20210209_lariat_box484_ex259a_4_w2SpinningDisc - Red.tif	BOX759
1301	2	327	690.24	2	1	1	325	686	329	693	6	12526	5759.55	1	1	338	1301	1301	MAX_20210209_lariat_box484_ex259a_4_w2SpinningDisc - Red.tif	BOX759
1302	2	327.875	455.079	2	1	1	325	452	331	459	8	23893.6	9729.85	1	1	330	1302	1302	MAX_20210209_lariat_box484_ex259a_4_w2SpinningDisc - Red.tif	BOX759
1303	2	327.892	779.85	2	1	1	325	776	331	783	10	28756.8	10285.8	1	1	339	1303	1303	MAX_20210209_lariat_box484_ex259a_4_w2SpinningDisc - Red.tif	BOX759
1304	2	327.556	872.281	2	1	1	325	868	330	875	7	14694	5793	1	1	340	1304	1304	MAX_20210209_lariat_box484_ex259a_4_w2SpinningDisc - Red.tif	BOX759
1305	2	328.58	608.82	2	1	1	325	605	331	615	5	28947.5	15568.3	1	1	337	1305	1305	MAX_20210209_lariat_box484_ex259a_4_w2SpinningDisc - Red.tif	BOX759
1306	2	328.618	613.128	2	1	1	327	611	330	615	5	4232.43	2307.43	0	1	0	1306	1306	MAX_20210209_lariat_box484_ex259a_4_w2SpinningDisc - Red.tif	BOX759
1307	2	329.476	837.44	2	1	1	327	834	332	840	12	30811.3	13874.7	1	1	347	1307	1307	MAX_20210209_lariat_box484_ex259a_4_w2SpinningDisc - Red.tif	BOX759
1308	2	329.474	697.506	2	1	1	327	693	331	699	4	14190	1544	1	1	346	1308	1308	MAX_20210209_lariat_box484_ex259a_4_w2SpinningDisc - Red.tif	BOX759
1309	2	330.983	425.996	2	1	1	329	422	333	429	9	11216.5	6585.27	1	1	350	1309	1309	MAX_20210209_lariat_box484_ex259a_4_w2SpinningDisc - Red.tif	BOX759
1310	2	331.969	440.046	2	1	1	329	436	334	443	10	25067	11590	1	1	351	1310	1310	MAX_20210209_lariat_box484_ex259a_4_w2SpinningDisc - Red.tif	BOX759
1311	2	332.153	962.018	2	1	1	329	959	335	970	15	65474.8	32537.1	1	1	356	1311	1311	MAX_20210209_lariat_box484_ex259a_4_w2SpinningDisc - Red.tif	BOX759
1312	2	333.158	500.797	2	1	1	331	497	336	504	6	17741	6624	1	1	360	1312	1312	MAX_20210209_lariat_box484_ex259a_4_w2SpinningDisc - Red.tif	BOX759
1313	2	334.504	480.481	2	1	1	332	476	337	483	12	26577	10949	1	1	366	1313	1313	MAX_20210209_lariat_box484_ex259a_4_w2SpinningDisc - Red.tif	BOX759
1314	2	333.985	487.451	2	1	1	331	484	336	490	8	17712.6	7651.45	1	1	359	1314	1314	MAX_20210209_lariat_box484_ex259a_4_w2SpinningDisc - Red.tif	BOX759
1315	2	333.698	626.84	2	1	1	331	622	336	631	12	41781	15854	1	1	361	1315	1315	MAX_20210209_lariat_box484_ex259a_4_w2SpinningDisc - Red.tif	BOX759
1316	2	334.005	733.132	2	1	1	331	729	336	736	10	21341	8402	1	1	362	1316	1316	MAX_20210209_lariat_box484_ex259a_4_w2SpinningDisc - Red.tif	BOX759
1317	2	336.46	432.008	2	1	1	333	429	339	434	8	20902.8	7290.55	1	1	370	1317	1317	MAX_20210209_lariat_box484_ex259a_4_w2SpinningDisc - Red.tif	BOX759
1318	2	335.645	536.47	2	1	1	333	533	338	539	9	25322.3	8358	1	1	372	1318	1318	MAX_20210209_lariat_box484_ex259a_4_w2SpinningDisc - Red.tif	BOX759
1319	2	335.749	766.956	2	1	1	334	764	338	769	4	7593.67	3812	1	1	379	1319	1319	MAX_20210209_lariat_box484_ex259a_4_w2SpinningDisc - Red.tif	BOX759
1320	2	335.82	903.85	2	1	1	333	901	338	907	8	25484.6	9587.27	1	1	375	1320	1320	MAX_20210209_lariat_box484_ex259a_4_w2SpinningDisc - Red.tif	BOX759
1321	2	336.678	603.825	2	1	1	334	598	339	606	7	21500.6	6910.23	1	1	378	1321	1321	MAX_20210209_lariat_box484_ex259a_4_w2SpinningDisc - Red.tif	BOX759
1322	2	337.445	457.481	2	1	1	335	453	340	459	4	16238.6	4189.55	1	1	382	1322	1322	MAX_20210209_lariat_box484_ex259a_4_w2SpinningDisc - Red.tif	BOX759
1323	2	337.698	574.304	2	1	1	333	568	340	576	3	21534	6653	1	1	373	1323	1323	MAX_20210209_lariat_box484_ex259a_4_w2SpinningDisc - Red.tif	BOX759
1324	2	337.407	590.755	2	1	1	335	587	340	593	5	15311.6	4647.09	1	1	383	1324	1324	MAX_20210209_lariat_box484_ex259a_4_w2SpinningDisc - Red.tif	BOX759
1325	2	337.393	635.186	2	1	1	335	631	340	638	7	24486	5936	1	1	384	1325	1325	MAX_20210209_lariat_box484_ex259a_4_w2SpinningDisc - Red.tif	BOX759
1326	2	339.128	464.162	2	1	1	334	459	342	466	8	34826.8	12619	1	1	377	1326	1326	MAX_20210209_lariat_box484_ex259a_4_w2SpinningDisc - Red.tif	BOX759
1327	2	338.433	975.238	2	1	1	337	973	340	977	5	-465.857	1171	0	1	0	1327	1327	MAX_20210209_lariat_box484_ex259a_4_w2SpinningDisc - Red.tif	BOX759
1328	2	340.809	969.12	2	1	1	338	966	343	973	11	30993	13292	1	1	397	1328	1328	MAX_20210209_lariat_box484_ex259a_4_w2SpinningDisc - Red.tif	BOX759
1329	2	340.399	487.817	2	1	1	338	483	343	494	5	22604.2	7499.75	1	1	392	1329	1329	MAX_20210209_lariat_box484_ex259a_4_w2SpinningDisc - Red.tif	BOX759
1330	2	341.916	559.809	2	1	1	339	556	345	563	21	181221	107774	1	1	401	1330	1330	MAX_20210209_lariat_box484_ex259a_4_w2SpinningDisc - Red.tif	BOX759
1331	2	341.571	905.992	2	1	1	339	903	344	909	12	33090.6	14306.1	1	1	402	1331	1331	MAX_20210209_lariat_box484_ex259a_4_w2SpinningDisc - Red.tif	BOX759
1332	2	341.785	442.446	2	1	1	339	439	344	445	10	18632.5	9383.82	1	1	398	1332	1332	MAX_20210209_lariat_box484_ex259a_4_w2SpinningDisc - Red.tif	BOX759
1333	2	343.039	664.869	2	1	1	340	661	345	668	10	20846	8198	1	1	405	1333	1333	MAX_20210209_lariat_box484_ex259a_4_w2SpinningDisc - Red.tif	BOX759
1334	2	344.709	412.642	2	1	1	343	409	348	414	3	11068.6	3062.2	1	1	417	1334	1334	MAX_20210209_lariat_box484_ex259a_4_w2SpinningDisc - Red.tif	BOX759
1335	2	344.64	732.183	2	1	1	342	727	347	734	5	15571	3555	1	1	416	1335	1335	MAX_20210209_lariat_box484_ex259a_4_w2SpinningDisc - Red.tif	BOX759
1336	2	346.23	426.62	2	1	1	343	422	349	432	8	21933.8	13229.3	1	1	418	1336	1336	MAX_20210209_lariat_box484_ex259a_4_w2SpinningDisc - Red.tif	BOX759
1337	2	345.337	887.8	2	1	1	343	884	348	890	5	11302.6	5198.36	1	1	422	1337	1337	MAX_20210209_lariat_box484_ex259a_4_w2SpinningDisc - Red.tif	BOX759
1338	2	347.189	449.868	2	1	1	344	446	350	452	6	16945.5	4953.71	1	1	424	1338	1338	MAX_20210209_lariat_box484_ex259a_4_w2SpinningDisc - Red.tif	BOX759
1339	2	346.576	856.684	2	1	1	345	850	349	860	10	26276.4	9444	1	1	428	1339	1339	MAX_20210209_lariat_box484_ex259a_4_w2SpinningDisc - Red.tif	BOX759
1340	2	349.648	417.314	2	1	1	346	414	352	419	3	12484.7	3965.91	1	1	429	1340	1340	MAX_20210209_lariat_box484_ex259a_4_w2SpinningDisc - Red.tif	BOX759
1341	2	350.638	596.737	2	1	1	348	593	353	600	13	20693	15882	1	1	437	1341	1341	MAX_20210209_lariat_box484_ex259a_4_w2SpinningDisc - Red.tif	BOX759
1342	2	349.392	635.776	2	1	1	347	632	352	638	5	12903.4	4311.73	1	1	432	1342	1342	MAX_20210209_lariat_box484_ex259a_4_w2SpinningDisc - Red.tif	BOX759
1343	2	349.491	762.885	2	1	1	347	759	351	765	6	9050.25	4574.75	1	1	434	1343	1343	MAX_20210209_lariat_box484_ex259a_4_w2SpinningDisc - Red.tif	BOX759
1344	2	351.759	533.591	2	1	1	347	529	354	536	8	20748	8271.29	1	1	431	1344	1344	MAX_20210209_lariat_box484_ex259a_4_w2SpinningDisc - Red.tif	BOX759
1345	2	350.539	741.391	2	1	1	348	737	353	743	4	15290.9	3377.27	1	1	439	1345	1345	MAX_20210209_lariat_box484_ex259a_4_w2SpinningDisc - Red.tif	BOX759
1346	2	352.887	402.542	2	1	1	350	398	357	405	20	60020.7	29549.9	1	1	444	1346	1346	MAX_20210209_lariat_box484_ex259a_4_w2SpinningDisc - Red.tif	BOX759
1347	2	352.112	584.356	2	1	1	350	581	355	587	11	28614.9	11337.5	1	1	447	1347	1347	MAX_20210209_lariat_box484_ex259a_4_w2SpinningDisc - Red.tif	BOX759
1348	2	351.845	720.245	2	1	1	349	717	354	723	9	25343.1	9511.64	1	1	442	1348	1348	MAX_20210209_lariat_box484_ex259a_4_w2SpinningDisc - Red.tif	BOX759
1349	2	351.935	802.925	2	1	1	350	799	354	806	10	16460.6	7957.36	1	1	451	1349	1349	MAX_20210209_lariat_box484_ex259a_4_w2SpinningDisc - Red.tif	BOX759
1350	2	353.388	621.185	2	1	1	348	616	356	623	5	29265.8	8851.4	1	1	438	1350	1350	MAX_20210209_lariat_box484_ex259a_4_w2SpinningDisc - Red.tif	BOX759
1351	2	353.227	692.991	2	1	1	351	690	355	695	4	9924.67	3359	1	1	455	1351	1351	MAX_20210209_lariat_box484_ex259a_4_w2SpinningDisc - Red.tif	BOX759
1352	2	353.981	881.175	2	1	1	352	878	356	884	10	18976	7300.5	1	1	461	1352	1352	MAX_20210209_lariat_box484_ex259a_4_w2SpinningDisc - Red.tif	BOX759
1353	2	354.519	479.457	2	1	1	352	476	357	481	4	9562.4	3460.4	1	1	458	1353	1353	MAX_20210209_lariat_box484_ex259a_4_w2SpinningDisc - Red.tif	BOX759
1354	2	354.407	911.249	2	1	1	352	909	356	915	7	8651.25	5304.75	1	1	462	1354	1354	MAX_20210209_lariat_box484_ex259a_4_w2SpinningDisc - Red.tif	BOX759
1355	2	355.636	920.737	2	1	1	353	917	358	924	13	35309	16460	1	1	464	1355	1355	MAX_20210209_lariat_box484_ex259a_4_w2SpinningDisc - Red.tif	BOX759
1356	2	355.648	496.795	2	1	1	354	493	358	499	5	11218.8	4592.75	1	1	465	1356	1356	MAX_20210209_lariat_box484_ex259a_4_w2SpinningDisc - Red.tif	BOX759
1357	2	356.312	955.354	2	1	1	354	953	359	960	9	28705	12877	1	1	467	1357	1357	MAX_20210209_lariat_box484_ex259a_4_w2SpinningDisc - Red.tif	BOX759
1358	2	358	573.958	2	1	1	355	570	359	576	3	7524.25	2189	1	1	470	1358	1358	MAX_20210209_lariat_box484_ex259a_4_w2SpinningDisc - Red.tif	BOX759
1359	2	361.79	561.766	2	1	1	359	558	364	564	6	18608.5	5788.18	1	1	484	1359	1359	MAX_20210209_lariat_box484_ex259a_4_w2SpinningDisc - Red.tif	BOX759
1360	2	362.759	682.025	2	1	1	359	678	365	685	11	33760.8	13884.8	1	1	485	1360	1360	MAX_20210209_lariat_box484_ex259a_4_w2SpinningDisc - Red.tif	BOX759
1361	2	361.372	850.933	2	1	1	359	847	363	854	8	15094	7692.64	1	1	486	1361	1361	MAX_20210209_lariat_box484_ex259a_4_w2SpinningDisc - Red.tif	BOX759
1362	2	361.76	897.079	2	1	1	359	894	364	901	11	24886	12576	1	1	488	1362	1362	MAX_20210209_lariat_box484_ex259a_4_w2SpinningDisc - Red.tif	BOX759
1363	2	362.51	388.472	2	1	1	361	385	365	390	4	5246	2612	1	1	492	1363	1363	MAX_20210209_lariat_box484_ex259a_4_w2SpinningDisc - Red.tif	BOX759
1364	2	363.218	404.115	2	1	1	361	401	366	406	8	19099.6	7319.6	1	1	493	1364	1364	MAX_20210209_lariat_box484_ex259a_4_w2SpinningDisc - Red.tif	BOX759
1365	2	363.132	646.244	2	1	1	361	642	365	649	9	20161.9	8031.09	1	1	495	1365	1365	MAX_20210209_lariat_box484_ex259a_4_w2SpinningDisc - Red.tif	BOX759
1366	2	363.403	817.724	2	1	1	361	814	366	823	5	23298.7	9982	1	1	497	1366	1366	MAX_20210209_lariat_box484_ex259a_4_w2SpinningDisc - Red.tif	BOX759
1367	2	365.639	463.3	2	1	1	363	459	368	466	11	31840	12514	1	1	501	1367	1367	MAX_20210209_lariat_box484_ex259a_4_w2SpinningDisc - Red.tif	BOX759
1368	2	364.566	719.706	2	1	1	362	716	367	722	5	19188.6	5309.09	1	1	498	1368	1368	MAX_20210209_lariat_box484_ex259a_4_w2SpinningDisc - Red.tif	BOX759
1369	2	364.702	876.452	2	1	1	363	873	367	879	6	13188.5	4965.75	1	1	504	1369	1369	MAX_20210209_lariat_box484_ex259a_4_w2SpinningDisc - Red.tif	BOX759
1370	2	364.541	914.949	2	1	1	362	912	367	917	6	16460.4	5727	1	1	500	1370	1370	MAX_20210209_lariat_box484_ex259a_4_w2SpinningDisc - Red.tif	BOX759
1371	2	365.997	477.945	2	1	1	363	474	369	481	11	33681.3	15635.8	1	1	502	1371	1371	MAX_20210209_lariat_box484_ex259a_4_w2SpinningDisc - Red.tif	BOX759
1372	2	365.463	489.423	2	1	1	363	486	367	491	4	12478	3064.67	1	1	503	1372	1372	MAX_20210209_lariat_box484_ex259a_4_w2SpinningDisc - Red.tif	BOX759
1373	2	367.83	410.58	2	1	1	365	407	371	413	12	38224.9	15240.8	1	1	510	1373	1373	MAX_20210209_lariat_box484_ex259a_4_w2SpinningDisc - Red.tif	BOX759
1374	2	366.883	422.803	2	1	1	364	419	369	425	8	20092.8	6509.18	1	1	506	1374	1374	MAX_20210209_lariat_box484_ex259a_4_w2SpinningDisc - Red.tif	BOX759
1375	2	366.827	699.209	2	1	1	364	695	369	701	6	16529.8	4550.55	1	1	507	1375	1375	MAX_20210209_lariat_box484_ex259a_4_w2SpinningDisc - Red.tif	BOX759
1376	2	367.305	845.175	2	1	1	365	838	370	848	10	36494.4	13090.2	1	1	513	1376	1376	MAX_20210209_lariat_box484_ex259a_4_w2SpinningDisc - Red.tif	BOX759
1377	2	366.836	854.025	2	1	1	364	851	369	857	9	21025.5	8181	1	1	508	1377	1377	MAX_20210209_lariat_box484_ex259a_4_w2SpinningDisc - Red.tif	BOX759
1378	2	367.554	862.994	2	1	1	365	860	370	866	6	14371.4	5255.64	1	1	514	1378	1378	MAX_20210209_lariat_box484_ex259a_4_w2SpinningDisc - Red.tif	BOX759
1379	2	369.244	560.764	2	1	1	367	557	372	563	8	21521.7	7994.82	1	1	521	1379	1379	MAX_20210209_lariat_box484_ex259a_4_w2SpinningDisc - Red.tif	BOX759
1380	2	369.186	642.642	2	1	1	366	639	372	645	9	23670.2	7827.75	1	1	517	1380	1380	MAX_20210209_lariat_box484_ex259a_4_w2SpinningDisc - Red.tif	BOX759
1381	2	368.483	714.504	2	1	1	367	713	370	716	4	838.333	1038.67	0	1	0	1381	1381	MAX_20210209_lariat_box484_ex259a_4_w2SpinningDisc - Red.tif	BOX759
1382	2	369	677.06	2	1	1	367	673	371	679	3	9973	3173.75	1	1	524	1382	1382	MAX_20210209_lariat_box484_ex259a_4_w2SpinningDisc - Red.tif	BOX759
1383	2	370.373	665.781	2	1	1	368	662	373	668	5	18118.1	3844	1	1	527	1383	1383	MAX_20210209_lariat_box484_ex259a_4_w2SpinningDisc - Red.tif	BOX759
1384	2	370.484	823.881	2	1	1	368	820	373	827	6	20982	6540	1	1	528	1384	1384	MAX_20210209_lariat_box484_ex259a_4_w2SpinningDisc - Red.tif	BOX759
1385	2	371.498	440.956	2	1	1	369	437	374	443	6	17873.7	4703.09	1	1	529	1385	1385	MAX_20210209_lariat_box484_ex259a_4_w2SpinningDisc - Red.tif	BOX759
1386	2	372.305	766.963	2	1	1	370	763	375	770	7	22456	8640	1	1	535	1386	1386	MAX_20210209_lariat_box484_ex259a_4_w2SpinningDisc - Red.tif	BOX759
1387	2	371.485	977.532	2	1	1	369	975	374	982	4	17664	5625	1	1	532	1387	1387	MAX_20210209_lariat_box484_ex259a_4_w2SpinningDisc - Red.tif	BOX759
1388	2	372.549	514.455	2	1	1	370	511	375	516	4	15118.6	2852.2	1	1	534	1388	1388	MAX_20210209_lariat_box484_ex259a_4_w2SpinningDisc - Red.tif	BOX759
1389	2	372.843	838.789	2	1	1	370	833	375	842	10	28088.3	11181.6	1	1	537	1389	1389	MAX_20210209_lariat_box484_ex259a_4_w2SpinningDisc - Red.tif	BOX759
1390	2	374.029	347.746	2	1	1	372	344	377	350	10	15900.6	11262.4	1	1	543	1390	1390	MAX_20210209_lariat_box484_ex259a_4_w2SpinningDisc - Red.tif	BOX759
1391	2	373.713	389.693	2	1	1	371	387	376	392	3	12775.8	3745.6	1	1	538	1391	1391	MAX_20210209_lariat_box484_ex259a_4_w2SpinningDisc - Red.tif	BOX759
1392	2	374.49	520.153	2	1	1	372	516	377	523	9	25070	8344	1	1	547	1392	1392	MAX_20210209_lariat_box484_ex259a_4_w2SpinningDisc - Red.tif	BOX759
1393	2	373.393	533.727	2	1	1	371	530	376	536	5	15659.2	5394.45	1	1	539	1393	1393	MAX_20210209_lariat_box484_ex259a_4_w2SpinningDisc - Red.tif	BOX759
1394	2	373.818	585.815	2	1	1	371	582	376	588	8	21374.7	7675.45	1	1	540	1394	1394	MAX_20210209_lariat_box484_ex259a_4_w2SpinningDisc - Red.tif	BOX759
1395	2	373.344	593.692	2	1	1	367	589	376	596	3	32300	9206	1	1	522	1395	1395	MAX_20210209_lariat_box484_ex259a_4_w2SpinningDisc - Red.tif	BOX759
1396	2	373.571	908.307	2	1	1	371	906	376	912	7	15038	7930.27	1	1	542	1396	1396	MAX_20210209_lariat_box484_ex259a_4_w2SpinningDisc - Red.tif	BOX759
1397	2	374.974	427.484	2	1	1	372	424	377	430	8	21143.1	6947.64	1	1	546	1397	1397	MAX_20210209_lariat_box484_ex259a_4_w2SpinningDisc - Red.tif	BOX759
1398	2	374.821	549.065	2	1	1	372	545	377	552	9	18054	8117	1	1	548	1398	1398	MAX_20210209_lariat_box484_ex259a_4_w2SpinningDisc - Red.tif	BOX759
1399	2	375.103	777.91	2	1	1	373	775	377	781	10	11080	7726.75	1	1	557	1399	1399	MAX_20210209_lariat_box484_ex259a_4_w2SpinningDisc - Red.tif	BOX759
1400	2	376.156	340.894	2	1	1	374	337	379	343	8	26441.6	8939.27	1	1	560	1400	1400	MAX_20210209_lariat_box484_ex259a_4_w2SpinningDisc - Red.tif	BOX759
1401	2	376.106	415.867	2	1	1	373	412	379	418	8	18985.4	6191.92	1	1	551	1401	1401	MAX_20210209_lariat_box484_ex259a_4_w2SpinningDisc - Red.tif	BOX759
1402	2	376.152	457.187	2	1	1	373	453	379	460	14	49681.5	21696.6	1	1	552	1402	1402	MAX_20210209_lariat_box484_ex259a_4_w2SpinningDisc - Red.tif	BOX759
1403	2	376.498	741.245	2	1	1	374	737	379	744	10	26419	11974	1	1	565	1403	1403	MAX_20210209_lariat_box484_ex259a_4_w2SpinningDisc - Red.tif	BOX759
1404	2	375.584	784.711	2	1	1	373	781	378	787	5	14355.2	5026.55	1	1	558	1404	1404	MAX_20210209_lariat_box484_ex259a_4_w2SpinningDisc - Red.tif	BOX759
1405	2	376.145	891.563	2	1	1	374	888	379	895	9	22201	9961	1	1	569	1405	1405	MAX_20210209_lariat_box484_ex259a_4_w2SpinningDisc - Red.tif	BOX759
1406	2	376.836	327.838	2	1	1	374	325	379	330	8	16255.6	8839.8	1	1	559	1406	1406	MAX_20210209_lariat_box484_ex259a_4_w2SpinningDisc - Red.tif	BOX759
1407	2	376.552	448.427	2	1	1	374	445	379	450	4	15454.4	4768	1	1	561	1407	1407	MAX_20210209_lariat_box484_ex259a_4_w2SpinningDisc - Red.tif	BOX759
1408	2	376.995	509.462	2	1	1	374	506	380	511	6	15581.5	4590	1	1	563	1408	1408	MAX_20210209_lariat_box484_ex259a_4_w2SpinningDisc - Red.tif	BOX759
1409	2	377.718	378.946	2	1	1	375	376	380	381	7	16050.2	5748	1	1	570	1409	1409	MAX_20210209_lariat_box484_ex259a_4_w2SpinningDisc - Red.tif	BOX759
1410	2	378.049	755.521	2	1	1	375	752	381	758	12	34461	17760.8	1	1	571	1410	1410	MAX_20210209_lariat_box484_ex259a_4_w2SpinningDisc - Red.tif	BOX759
1411	2	378.835	534.27	2	1	1	376	531	381	537	9	19440.6	8222.82	1	1	574	1411	1411	MAX_20210209_lariat_box484_ex259a_4_w2SpinningDisc - Red.tif	BOX759
1412	2	378.53	660.453	2	1	1	376	657	381	663	8	19187.1	6814.36	1	1	575	1412	1412	MAX_20210209_lariat_box484_ex259a_4_w2SpinningDisc - Red.tif	BOX759
1413	2	379.579	799.379	2	1	1	377	796	382	802	11	25021.2	10240.5	1	1	582	1413	1413	MAX_20210209_lariat_box484_ex259a_4_w2SpinningDisc - Red.tif	BOX759
1414	2	380.017	319.243	2	1	1	378	316	383	322	10	21902.2	11166.1	1	1	584	1414	1414	MAX_20210209_lariat_box484_ex259a_4_w2SpinningDisc - Red.tif	BOX759
1415	2	380.963	314.459	2	1	1	378	312	384	316	6	13520	6232.5	1	1	583	1415	1415	MAX_20210209_lariat_box484_ex259a_4_w2SpinningDisc - Red.tif	BOX759
1416	2	380.922	384.619	2	1	1	378	381	383	387	7	21494.3	7421.09	1	1	585	1416	1416	MAX_20210209_lariat_box484_ex259a_4_w2SpinningDisc - Red.tif	BOX759
1417	2	380.765	828.391	2	1	1	378	825	383	831	10	23250.5	10281.2	1	1	590	1417	1417	MAX_20210209_lariat_box484_ex259a_4_w2SpinningDisc - Red.tif	BOX759
1418	2	381.038	877.647	2	1	1	378	875	383	880	7	14202	6488.8	1	1	591	1418	1418	MAX_20210209_lariat_box484_ex259a_4_w2SpinningDisc - Red.tif	BOX759
1419	2	382.534	372.994	2	1	1	380	370	385	375	8	22501.2	7791.2	1	1	596	1419	1419	MAX_20210209_lariat_box484_ex259a_4_w2SpinningDisc - Red.tif	BOX759
1420	2	381.78	806.891	2	1	1	380	804	385	809	4	12638.4	4690.6	1	1	598	1420	1420	MAX_20210209_lariat_box484_ex259a_4_w2SpinningDisc - Red.tif	BOX759
1421	2	382.875	346.322	2	1	1	380	343	385	350	13	8315	12518	1	1	594	1421	1421	MAX_20210209_lariat_box484_ex259a_4_w2SpinningDisc - Red.tif	BOX759
1422	2	382.688	361.95	2	1	1	380	359	385	364	7	26943.8	7021.4	1	1	595	1422	1422	MAX_20210209_lariat_box484_ex259a_4_w2SpinningDisc - Red.tif	BOX759
1423	2	382.516	816.411	2	1	1	380	811	385	820	12	25767.6	9687.86	1	1	599	1423	1423	MAX_20210209_lariat_box484_ex259a_4_w2SpinningDisc - Red.tif	BOX759
1424	2	382.273	855.32	2	1	1	380	852	385	858	3	12815.1	4765.18	1	1	600	1424	1424	MAX_20210209_lariat_box484_ex259a_4_w2SpinningDisc - Red.tif	BOX759
1425	2	383.62	598.295	2	1	1	382	594	386	600	3	9575.25	4023.25	1	1	605	1425	1425	MAX_20210209_lariat_box484_ex259a_4_w2SpinningDisc - Red.tif	BOX759
1426	2	383.305	619.325	2	1	1	381	616	385	621	3	6978.67	3430	1	1	602	1426	1426	MAX_20210209_lariat_box484_ex259a_4_w2SpinningDisc - Red.tif	BOX759
1427	2	386.132	573.594	2	1	1	383	570	389	577	14	51250.1	21487.8	1	1	610	1427	1427	MAX_20210209_lariat_box484_ex259a_4_w2SpinningDisc - Red.tif	BOX759
1428	2	386.571	300.474	2	1	1	384	297	389	302	4	10753.6	3577.8	1	1	613	1428	1428	MAX_20210209_lariat_box484_ex259a_4_w2SpinningDisc - Red.tif	BOX759
1429	2	387.276	449.02	2	1	1	384	445	389	451	7	20024.9	6208.55	1	1	615	1429	1429	MAX_20210209_lariat_box484_ex259a_4_w2SpinningDisc - Red.tif	BOX759
1430	2	386.743	475.213	2	1	1	384	471	389	478	8	23070	7523	1	1	616	1430	1430	MAX_20210209_lariat_box484_ex259a_4_w2SpinningDisc - Red.tif	BOX759
1431	2	386.461	637.516	2	1	1	384	634	388	640	4	9394.5	3813	1	1	617	1431	1431	MAX_20210209_lariat_box484_ex259a_4_w2SpinningDisc - Red.tif	BOX759
1432	2	387.971	316.733	2	1	1	386	313	390	318	4	7248	3368	1	1	622	1432	1432	MAX_20210209_lariat_box484_ex259a_4_w2SpinningDisc - Red.tif	BOX759
1433	2	388.188	665.792	2	1	1	385	662	391	669	12	31560.9	14011.9	1	1	621	1433	1433	MAX_20210209_lariat_box484_ex259a_4_w2SpinningDisc - Red.tif	BOX759
1434	2	387.97	719.478	2	1	1	386	716	390	722	8	15614.8	5639.5	1	1	627	1434	1434	MAX_20210209_lariat_box484_ex259a_4_w2SpinningDisc - Red.tif	BOX759
1435	2	388.201	371.922	2	1	1	386	369	390	374	4	11687.7	3784.33	1	1	623	1435	1435	MAX_20210209_lariat_box484_ex259a_4_w2SpinningDisc - Red.tif	BOX759
1436	2	388.747	681.216	2	1	1	386	677	391	684	8	25631	9223	1	1	625	1436	1436	MAX_20210209_lariat_box484_ex259a_4_w2SpinningDisc - Red.tif	BOX759
1437	2	389.122	692.629	2	1	1	387	689	391	695	9	15610.8	6161.25	1	1	631	1437	1437	MAX_20210209_lariat_box484_ex259a_4_w2SpinningDisc - Red.tif	BOX759
1438	2	389.44	306.291	2	1	1	387	303	392	309	7	17055.9	6617.18	1	1	629	1438	1438	MAX_20210209_lariat_box484_ex259a_4_w2SpinningDisc - Red.tif	BOX759
1439	2	389.255	648.987	2	1	1	386	645	391	651	4	19613.4	4210.91	1	1	624	1439	1439	MAX_20210209_lariat_box484_ex259a_4_w2SpinningDisc - Red.tif	BOX759
1440	2	390.62	427.771	2	1	1	388	424	393	430	5	12679.1	4097.82	1	1	633	1440	1440	MAX_20210209_lariat_box484_ex259a_4_w2SpinningDisc - Red.tif	BOX759
1441	2	390.296	461.299	2	1	1	388	458	392	464	3	13036	3398.25	1	1	634	1441	1441	MAX_20210209_lariat_box484_ex259a_4_w2SpinningDisc - Red.tif	BOX759
1442	2	390.978	710.505	2	1	1	388	707	393	713	8	19194.8	7286.91	1	1	635	1442	1442	MAX_20210209_lariat_box484_ex259a_4_w2SpinningDisc - Red.tif	BOX759
1443	2	391.43	757.664	2	1	1	386	754	394	760	11	41487	9715.75	1	1	628	1443	1443	MAX_20210209_lariat_box484_ex259a_4_w2SpinningDisc - Red.tif	BOX759
1444	2	391.463	333.997	2	1	1	389	331	394	336	6	14049.8	5308.8	1	1	637	1444	1444	MAX_20210209_lariat_box484_ex259a_4_w2SpinningDisc - Red.tif	BOX759
1445	2	392.135	389.632	2	1	1	390	386	395	392	9	20651.5	9232	1	1	640	1445	1445	MAX_20210209_lariat_box484_ex259a_4_w2SpinningDisc - Red.tif	BOX759
1446	2	393.215	403.796	2	1	1	390	400	396	406	8	23223.8	9340.38	1	1	641	1446	1446	MAX_20210209_lariat_box484_ex259a_4_w2SpinningDisc - Red.tif	BOX759
1447	2	392.681	641.895	2	1	1	390	638	395	644	7	21577.9	6427.82	1	1	643	1447	1447	MAX_20210209_lariat_box484_ex259a_4_w2SpinningDisc - Red.tif	BOX759
1448	2	393.655	436.334	2	1	1	391	432	396	438	3	14963.4	4385.27	1	1	645	1448	1448	MAX_20210209_lariat_box484_ex259a_4_w2SpinningDisc - Red.tif	BOX759
1449	2	393.23	548.966	2	1	1	391	545	396	551	4	16997.3	4819.91	1	1	647	1449	1449	MAX_20210209_lariat_box484_ex259a_4_w2SpinningDisc - Red.tif	BOX759
1450	2	393.807	600.168	2	1	1	391	597	397	602	6	16331.5	7206.18	1	1	648	1450	1450	MAX_20210209_lariat_box484_ex259a_4_w2SpinningDisc - Red.tif	BOX759
1451	2	395.157	280.621	2	1	1	393	277	398	283	9	23531.9	9745.09	1	1	653	1451	1451	MAX_20210209_lariat_box484_ex259a_4_w2SpinningDisc - Red.tif	BOX759
1452	2	394.502	419.957	2	1	1	392	416	397	422	6	17331.1	5840	1	1	651	1452	1452	MAX_20210209_lariat_box484_ex259a_4_w2SpinningDisc - Red.tif	BOX759
1453	2	395.662	542.632	2	1	1	393	539	398	546	12	30389	14196	1	1	654	1453	1453	MAX_20210209_lariat_box484_ex259a_4_w2SpinningDisc - Red.tif	BOX759
1454	2	395.247	735.536	2	1	1	393	731	398	738	10	22212	9214	1	1	655	1454	1454	MAX_20210209_lariat_box484_ex259a_4_w2SpinningDisc - Red.tif	BOX759
1455	2	396.469	586.413	2	1	1	394	583	399	589	4	18701.2	5606.64	1	1	658	1455	1455	MAX_20210209_lariat_box484_ex259a_4_w2SpinningDisc - Red.tif	BOX759
1456	2	396.528	604.445	2	1	1	395	601	399	606	4	13599	3369.33	1	1	665	1456	1456	MAX_20210209_lariat_box484_ex259a_4_w2SpinningDisc - Red.tif	BOX759
1457	2	397.358	636.178	2	1	1	395	633	400	639	8	18211.4	8004.82	1	1	666	1457	1457	MAX_20210209_lariat_box484_ex259a_4_w2SpinningDisc - Red.tif	BOX759
1458	2	396.481	707.495	2	1	1	394	704	399	710	8	18346.4	6430.64	1	1	660	1458	1458	MAX_20210209_lariat_box484_ex259a_4_w2SpinningDisc - Red.tif	BOX759
1459	2	398.407	397.396	2	1	1	395	394	401	400	11	31327.1	12752.5	1	1	663	1459	1459	MAX_20210209_lariat_box484_ex259a_4_w2SpinningDisc - Red.tif	BOX759
1460	2	397.519	562.415	2	1	1	395	558	400	565	8	25440	6746	1	1	664	1460	1460	MAX_20210209_lariat_box484_ex259a_4_w2SpinningDisc - Red.tif	BOX759
1461	2	399.026	489.911	2	1	1	396	486	401	492	9	28292.6	7825.82	1	1	670	1461	1461	MAX_20210209_lariat_box484_ex259a_4_w2SpinningDisc - Red.tif	BOX759
1462	2	399.274	619.178	2	1	1	396	615	402	622	8	26313	7379.62	1	1	672	1462	1462	MAX_20210209_lariat_box484_ex259a_4_w2SpinningDisc - Red.tif	BOX759
1463	2	398.962	625.053	2	1	1	397	621	402	628	12	23295	14078	1	1	679	1463	1463	MAX_20210209_lariat_box484_ex259a_4_w2SpinningDisc - Red.tif	BOX759
1464	2	398.688	685.982	2	1	1	396	682	401	688	7	14964.7	5852.64	1	1	674	1464	1464	MAX_20210209_lariat_box484_ex259a_4_w2SpinningDisc - Red.tif	BOX759
1465	2	400.619	277.848	2	1	1	398	270	406	280	9	48938	19093	1	1	680	1465	1465	MAX_20210209_lariat_box484_ex259a_4_w2SpinningDisc - Red.tif	BOX759
1466	2	399.395	384.724	2	1	1	397	381	402	387	5	14383.5	6283.18	1	1	675	1466	1466	MAX_20210209_lariat_box484_ex259a_4_w2SpinningDisc - Red.tif	BOX759
1467	2	399.585	427.657	2	1	1	397	422	402	432	12	28681.2	12948.6	1	1	676	1467	1467	MAX_20210209_lariat_box484_ex259a_4_w2SpinningDisc - Red.tif	BOX759
1468	2	399.937	550.743	2	1	1	397	547	403	553	10	28759.6	9661.96	1	1	678	1468	1468	MAX_20210209_lariat_box484_ex259a_4_w2SpinningDisc - Red.tif	BOX759
1469	2	401.58	363.559	2	1	1	399	360	405	366	12	32186.8	16560.5	1	1	681	1469	1469	MAX_20210209_lariat_box484_ex259a_4_w2SpinningDisc - Red.tif	BOX759
1470	2	400.795	535.789	2	1	1	399	532	403	538	6	13790.2	4144.75	1	1	682	1470	1470	MAX_20210209_lariat_box484_ex259a_4_w2SpinningDisc - Red.tif	BOX759
1471	2	401.496	674.5	2	1	1	399	671	404	677	4	12933.8	5124.36	1	1	684	1471	1471	MAX_20210209_lariat_box484_ex259a_4_w2SpinningDisc - Red.tif	BOX759
1472	2	402.766	581.012	2	1	1	401	579	405	583	7	841.125	4234.62	0	1	0	1472	1472	MAX_20210209_lariat_box484_ex259a_4_w2SpinningDisc - Red.tif	BOX759
1473	2	404.481	398.248	2	1	1	402	395	407	401	14	33885.8	15569.6	1	1	694	1473	1473	MAX_20210209_lariat_box484_ex259a_4_w2SpinningDisc - Red.tif	BOX759
1474	2	403.82	491.298	2	1	1	401	488	406	494	9	26975.5	7430.91	1	1	689	1474	1474	MAX_20210209_lariat_box484_ex259a_4_w2SpinningDisc - Red.tif	BOX759
1475	2	404.875	517.901	2	1	1	402	514	408	520	12	34825.3	13752.8	1	1	698	1475	1475	MAX_20210209_lariat_box484_ex259a_4_w2SpinningDisc - Red.tif	BOX759
1476	2	404.536	407.671	2	1	1	402	404	407	410	7	21854.2	7704.45	1	1	695	1476	1476	MAX_20210209_lariat_box484_ex259a_4_w2SpinningDisc - Red.tif	BOX759
1477	2	404.8	612.149	2	1	1	402	609	407	614	6	19944.6	4193.6	1	1	699	1477	1477	MAX_20210209_lariat_box484_ex259a_4_w2SpinningDisc - Red.tif	BOX759
1478	2	405	348.004	2	1	1	402	345	407	350	3	11299.4	5073	1	1	693	1478	1478	MAX_20210209_lariat_box484_ex259a_4_w2SpinningDisc - Red.tif	BOX759
1479	2	407.338	368.634	2	1	1	404	365	410	371	13	44189.9	19630	1	1	701	1479	1479	MAX_20210209_lariat_box484_ex259a_4_w2SpinningDisc - Red.tif	BOX759
1480	2	407.516	452.466	2	1	1	404	449	411	455	14	56939.1	21804.4	1	1	702	1480	1480	MAX_20210209_lariat_box484_ex259a_4_w2SpinningDisc - Red.tif	BOX759
1481	2	407.461	504.447	2	1	1	405	501	410	507	12	27517.6	11595.7	1	1	707	1481	1481	MAX_20210209_lariat_box484_ex259a_4_w2SpinningDisc - Red.tif	BOX759
1482	2	406.991	591.438	2	1	1	405	588	409	593	6	13076	3089.33	1	1	709	1482	1482	MAX_20210209_lariat_box484_ex259a_4_w2SpinningDisc - Red.tif	BOX759
1483	2	407.635	299.735	2	1	1	405	296	410	302	5	14776.3	4738.45	1	1	704	1483	1483	MAX_20210209_lariat_box484_ex259a_4_w2SpinningDisc - Red.tif	BOX759
1484	2	407.973	461.421	2	1	1	405	457	410	464	8	23956	5085	1	1	706	1484	1484	MAX_20210209_lariat_box484_ex259a_4_w2SpinningDisc - Red.tif	BOX759
1485	2	407.716	530.527	2	1	1	405	527	410	533	10	20503	9357.55	1	1	708	1485	1485	MAX_20210209_lariat_box484_ex259a_4_w2SpinningDisc - Red.tif	BOX759
1486	2	407	606.45	2	1	1	405	601	409	609	4	19080.1	5546.62	1	1	710	1486	1486	MAX_20210209_lariat_box484_ex259a_4_w2SpinningDisc - Red.tif	BOX759
1487	2	409.009	330.277	2	1	1	406	327	411	332	7	9233.2	4329.2	1	1	715	1487	1487	MAX_20210209_lariat_box484_ex259a_4_w2SpinningDisc - Red.tif	BOX759
1488	2	409.106	381.653	2	1	1	406	378	412	384	9	31582.7	12909.8	1	1	716	1488	1488	MAX_20210209_lariat_box484_ex259a_4_w2SpinningDisc - Red.tif	BOX759
1489	2	409.129	490.064	2	1	1	407	486	412	493	9	22879	10360	1	1	723	1489	1489	MAX_20210209_lariat_box484_ex259a_4_w2SpinningDisc - Red.tif	BOX759
1490	2	409.449	557.548	2	1	1	407	554	412	560	12	28948.5	10872.6	1	1	724	1490	1490	MAX_20210209_lariat_box484_ex259a_4_w2SpinningDisc - Red.tif	BOX759
1491	2	409.538	578.75	2	1	1	406	575	413	581	10	35087.8	11400.6	1	1	719	1491	1491	MAX_20210209_lariat_box484_ex259a_4_w2SpinningDisc - Red.tif	BOX759
1492	2	408	633.938	2	1	1	405	630	410	636	3	17077.9	3953.82	1	1	711	1492	1492	MAX_20210209_lariat_box484_ex259a_4_w2SpinningDisc - Red.tif	BOX759
1493	2	410.13	434.828	2	1	1	407	431	412	437	8	18413.9	5857.64	1	1	722	1493	1493	MAX_20210209_lariat_box484_ex259a_4_w2SpinningDisc - Red.tif	BOX759
1494	2	410.372	475.427	2	1	1	408	472	413	478	11	28773	10596.2	1	1	726	1494	1494	MAX_20210209_lariat_box484_ex259a_4_w2SpinningDisc - Red.tif	BOX759
1495	2	410.337	267.181	2	1	1	407	263	413	272	5	24075.7	8254.67	1	1	721	1495	1495	MAX_20210209_lariat_box484_ex259a_4_w2SpinningDisc - Red.tif	BOX759
1496	2	410.927	345.925	2	1	1	408	342	413	348	9	17258.5	8265.18	1	1	725	1496	1496	MAX_20210209_lariat_box484_ex259a_4_w2SpinningDisc - Red.tif	BOX759
1497	2	411.032	570.478	2	1	1	409	566	413	573	8	13068.6	5740.09	1	1	731	1497	1497	MAX_20210209_lariat_box484_ex259a_4_w2SpinningDisc - Red.tif	BOX759
1498	2	411.493	354.905	2	1	1	409	351	414	357	6	15100.2	6257.91	1	1	727	1498	1498	MAX_20210209_lariat_box484_ex259a_4_w2SpinningDisc - Red.tif	BOX759
1499	2	412.127	426.268	2	1	1	409	422	415	429	9	27040.2	10391.5	1	1	729	1499	1499	MAX_20210209_lariat_box484_ex259a_4_w2SpinningDisc - Red.tif	BOX759
1500	2	414.276	283.28	2	1	1	411	280	417	286	14	19749.3	13545.2	1	1	739	1500	1500	MAX_20210209_lariat_box484_ex259a_4_w2SpinningDisc - Red.tif	BOX759
1501	2	413.388	396.306	2	1	1	410	393	416	399	13	44311.9	17739.9	1	1	733	1501	1501	MAX_20210209_lariat_box484_ex259a_4_w2SpinningDisc - Red.tif	BOX759
1502	2	412.674	523.977	2	1	1	410	520	415	526	7	22717.9	6437.18	1	1	734	1502	1502	MAX_20210209_lariat_box484_ex259a_4_w2SpinningDisc - Red.tif	BOX759
1503	2	413.931	454.485	2	1	1	411	451	416	457	8	30502.5	9323.18	1	1	736	1503	1503	MAX_20210209_lariat_box484_ex259a_4_w2SpinningDisc - Red.tif	BOX759
1504	2	415.007	326.311	2	1	1	413	323	418	328	7	14989.2	5112.2	1	1	741	1504	1504	MAX_20210209_lariat_box484_ex259a_4_w2SpinningDisc - Red.tif	BOX759
1505	2	414.837	540.517	2	1	1	412	533	417	543	7	22186.4	9169.4	1	1	740	1505	1505	MAX_20210209_lariat_box484_ex259a_4_w2SpinningDisc - Red.tif	BOX759
1506	2	414.969	562.67	2	1	1	413	559	418	565	7	19082.1	4735.45	1	1	743	1506	1506	MAX_20210209_lariat_box484_ex259a_4_w2SpinningDisc - Red.tif	BOX759
1507	2	415.602	340.495	2	1	1	414	338	418	342	4	6434.56	3200.31	1	1	746	1507	1507	MAX_20210209_lariat_box484_ex259a_4_w2SpinningDisc - Red.tif	BOX759
1508	2	416.675	361.295	2	1	1	414	358	419	364	13	44412.3	21065.2	1	1	747	1508	1508	MAX_20210209_lariat_box484_ex259a_4_w2SpinningDisc - Red.tif	BOX759
1509	2	416.57	334.48	2	1	1	414	331	419	336	4	15491.6	4693	1	1	745	1509	1509	MAX_20210209_lariat_box484_ex259a_4_w2SpinningDisc - Red.tif	BOX759
1510	2	417.989	381.049	2	1	1	414	377	422	384	12	37316.6	15128.2	1	1	748	1510	1510	MAX_20210209_lariat_box484_ex259a_4_w2SpinningDisc - Red.tif	BOX759
1511	2	416.491	473.982	2	1	1	414	470	418	476	6	10630.5	4448	1	1	749	1511	1511	MAX_20210209_lariat_box484_ex259a_4_w2SpinningDisc - Red.tif	BOX759
1512	2	417.686	216.039	2	1	1	415	213	420	218	7	7045.4	6140.4	1	1	751	1512	1512	MAX_20210209_lariat_box484_ex259a_4_w2SpinningDisc - Red.tif	BOX759
1513	2	417.589	293.518	2	1	1	415	290	420	295	4	8133.2	4558.2	1	1	753	1513	1513	MAX_20210209_lariat_box484_ex259a_4_w2SpinningDisc - Red.tif	BOX759
1514	2	417.75	352.004	2	1	1	415	346	420	355	9	27605.1	11265.9	1	1	754	1514	1514	MAX_20210209_lariat_box484_ex259a_4_w2SpinningDisc - Red.tif	BOX759
1515	2	417.357	496.284	2	1	1	415	492	419	498	3	10896	2302.75	1	1	755	1515	1515	MAX_20210209_lariat_box484_ex259a_4_w2SpinningDisc - Red.tif	BOX759
1516	2	419.674	445.424	2	1	1	417	441	423	449	17	54327	30977	1	1	765	1516	1516	MAX_20210209_lariat_box484_ex259a_4_w2SpinningDisc - Red.tif	BOX759
1517	2	419.767	226.461	2	1	1	417	223	422	229	10	27945.2	8217.09	1	1	760	1517	1517	MAX_20210209_lariat_box484_ex259a_4_w2SpinningDisc - Red.tif	BOX759
1518	2	420.028	237.677	2	1	1	417	234	423	240	7	20971.8	8536.54	1	1	761	1518	1518	MAX_20210209_lariat_box484_ex259a_4_w2SpinningDisc - Red.tif	BOX759
1519	2	419.657	314.262	2	1	1	417	311	423	316	3	15518.3	3967.18	1	1	762	1519	1519	MAX_20210209_lariat_box484_ex259a_4_w2SpinningDisc - Red.tif	BOX759
1520	2	419.759	376.036	2	1	1	418	374	421	378	4	338.714	1727.43	0	1	0	1520	1520	MAX_20210209_lariat_box484_ex259a_4_w2SpinningDisc - Red.tif	BOX759
1521	2	420.57	405.006	2	1	1	418	402	423	407	11	28407.4	10932	1	1	766	1521	1521	MAX_20210209_lariat_box484_ex259a_4_w2SpinningDisc - Red.tif	BOX759
1522	2	420.491	420.366	2	1	1	417	417	423	423	12	43651.2	15935.2	1	1	763	1522	1522	MAX_20210209_lariat_box484_ex259a_4_w2SpinningDisc - Red.tif	BOX759
1523	2	421.484	436.136	2	1	1	418	433	425	440	18	23862.3	20044.9	0	1	0	1523	1523	MAX_20210209_lariat_box484_ex259a_4_w2SpinningDisc - Red.tif	BOX759
1524	2	420.736	413.119	2	1	1	418	409	423	416	8	20029	9460	1	1	767	1524	1524	MAX_20210209_lariat_box484_ex259a_4_w2SpinningDisc - Red.tif	BOX759
1525	2	421.463	369.915	2	1	1	419	367	424	372	6	10076.2	5132.8	1	1	770	1525	1525	MAX_20210209_lariat_box484_ex259a_4_w2SpinningDisc - Red.tif	BOX759
1526	2	421.269	490.612	2	1	1	419	487	423	493	3	11172.8	3581.25	1	1	772	1526	1526	MAX_20210209_lariat_box484_ex259a_4_w2SpinningDisc - Red.tif	BOX759
1527	2	423.005	289.981	2	1	1	421	287	426	292	9	20639	7049.2	1	1	777	1527	1527	MAX_20210209_lariat_box484_ex259a_4_w2SpinningDisc - Red.tif	BOX759
1528	2	422.524	462.937	2	1	1	420	459	425	465	6	15503.6	5072.55	1	1	776	1528	1528	MAX_20210209_lariat_box484_ex259a_4_w2SpinningDisc - Red.tif	BOX759
1529	2	425.465	259.431	2	1	1	423	256	428	262	4	13867.7	5158.18	1	1	779	1529	1529	MAX_20210209_lariat_box484_ex259a_4_w2SpinningDisc - Red.tif	BOX759
1530	2	425.464	375.445	2	1	1	423	372	428	377	4	9641.2	3624.2	1	1	781	1530	1530	MAX_20210209_lariat_box484_ex259a_4_w2SpinningDisc - Red.tif	BOX759
1531	2	426.802	314.789	2	1	1	425	311	429	317	6	14014.5	5303.25	1	1	785	1531	1531	MAX_20210209_lariat_box484_ex259a_4_w2SpinningDisc - Red.tif	BOX759
1532	2	428.667	331.081	2	1	1	426	327	431	336	21	47888.4	26073.3	1	1	789	1532	1532	MAX_20210209_lariat_box484_ex259a_4_w2SpinningDisc - Red.tif	BOX759
1533	2	427.5	398.455	2	1	1	425	395	429	400	4	8097	3068.33	1	1	786	1533	1533	MAX_20210209_lariat_box484_ex259a_4_w2SpinningDisc - Red.tif	BOX759
1534	2	428.194	239.731	2	1	1	426	236	430	242	4	13604.8	5129.75	1	1	787	1534	1534	MAX_20210209_lariat_box484_ex259a_4_w2SpinningDisc - Red.tif	BOX759
1535	2	430.804	297.383	2	1	1	428	293	435	301	17	23402.8	22273.2	1	1	796	1535	1535	MAX_20210209_lariat_box484_ex259a_4_w2SpinningDisc - Red.tif	BOX759
1536	2	430.31	351.838	2	1	1	428	349	433	354	9	18764.2	6709.6	1	1	793	1536	1536	MAX_20210209_lariat_box484_ex259a_4_w2SpinningDisc - Red.tif	BOX759
1537	2	430.518	229.977	2	1	1	428	226	433	232	6	16995.7	6004.45	1	1	792	1537	1537	MAX_20210209_lariat_box484_ex259a_4_w2SpinningDisc - Red.tif	BOX759
1538	2	433.162	195.325	2	1	1	431	192	435	198	7	11008.5	5267.25	1	1	798	1538	1538	MAX_20210209_lariat_box484_ex259a_4_w2SpinningDisc - Red.tif	BOX759
1539	2	434.666	238.827	2	1	1	432	235	438	241	9	29260.3	10917.5	1	1	799	1539	1539	MAX_20210209_lariat_box484_ex259a_4_w2SpinningDisc - Red.tif	BOX759
1540	2	437.498	335.191	2	1	1	435	332	440	338	12	30490.6	15154.9	1	1	804	1540	1540	MAX_20210209_lariat_box484_ex259a_4_w2SpinningDisc - Red.tif	BOX759
1541	2	437.749	320.505	2	1	1	435	318	440	324	10	15675.5	10181.4	1	1	803	1541	1541	MAX_20210209_lariat_box484_ex259a_4_w2SpinningDisc - Red.tif	BOX759
1542	2	439.168	192.137	2	1	1	436	189	442	195	11	26341.6	15485.9	1	1	805	1542	1542	MAX_20210209_lariat_box484_ex259a_4_w2SpinningDisc - Red.tif	BOX759
1543	2	439.703	300.118	2	1	1	437	297	442	302	9	17538.4	6626	1	1	808	1543	1543	MAX_20210209_lariat_box484_ex259a_4_w2SpinningDisc - Red.tif	BOX759
1544	2	441.799	309.978	2	1	1	439	307	445	312	10	23572.8	11710.5	1	1	811	1544	1544	MAX_20210209_lariat_box484_ex259a_4_w2SpinningDisc - Red.tif	BOX759
1545	2	443.165	169.204	2	1	1	440	166	446	172	11	21353.5	14382.7	1	1	812	1545	1545	MAX_20210209_lariat_box484_ex259a_4_w2SpinningDisc - Red.tif	BOX759
1546	2	442.564	262.441	2	1	1	440	258	445	264	4	12693.8	2167.18	1	1	815	1546	1546	MAX_20210209_lariat_box484_ex259a_4_w2SpinningDisc - Red.tif	BOX759
1547	2	443	278.966	2	1	1	441	275	445	281	3	11099.2	4850.5	1	1	817	1547	1547	MAX_20210209_lariat_box484_ex259a_4_w2SpinningDisc - Red.tif	BOX759
1548	2	447.997	236.132	2	1	1	445	232	451	239	10	35017.2	13014.9	1	1	825	1548	1548	MAX_20210209_lariat_box484_ex259a_4_w2SpinningDisc - Red.tif	BOX759
1549	2	447.796	287.633	2	1	1	445	284	451	290	9	18335.7	8761.67	1	1	826	1549	1549	MAX_20210209_lariat_box484_ex259a_4_w2SpinningDisc - Red.tif	BOX759
1550	2	449.486	277.974	2	1	1	447	274	452	280	8	20564.3	7195.55	1	1	829	1550	1550	MAX_20210209_lariat_box484_ex259a_4_w2SpinningDisc - Red.tif	BOX759
1551	2	450.268	149.694	2	1	1	449	146	454	151	3	8087.4	3571.4	1	1	833	1551	1551	MAX_20210209_lariat_box484_ex259a_4_w2SpinningDisc - Red.tif	BOX759
1552	2	451.089	198.824	2	1	1	449	196	453	202	12	665.5	8212.25	0	1	0	1552	1552	MAX_20210209_lariat_box484_ex259a_4_w2SpinningDisc - Red.tif	BOX759
1553	2	450.485	228.504	2	1	1	449	227	452	230	4	-132	1439	0	1	0	1553	1553	MAX_20210209_lariat_box484_ex259a_4_w2SpinningDisc - Red.tif	BOX759
1554	2	450.266	260.674	2	1	1	448	257	452	262	3	8720.33	2406	1	1	831	1554	1554	MAX_20210209_lariat_box484_ex259a_4_w2SpinningDisc - Red.tif	BOX759
1555	2	450.73	293.014	2	1	1	449	290	454	295	4	10672	3566.8	1	1	834	1555	1555	MAX_20210209_lariat_box484_ex259a_4_w2SpinningDisc - Red.tif	BOX759
1556	2	452.708	179.982	2	1	1	450	176	455	182	7	22318.2	7253.36	1	1	835	1556	1556	MAX_20210209_lariat_box484_ex259a_4_w2SpinningDisc - Red.tif	BOX759
1557	2	455	213.93	2	1	1	452	210	457	216	3	12472.1	3305	1	1	838	1557	1557	MAX_20210209_lariat_box484_ex259a_4_w2SpinningDisc - Red.tif	BOX759
1558	2	455.428	270.209	2	1	1	453	266	458	272	5	11706.6	5371.82	1	1	839	1558	1558	MAX_20210209_lariat_box484_ex259a_4_w2SpinningDisc - Red.tif	BOX759
1559	2	457.98	249.13	2	1	1	455	245	461	252	10	27560.8	11336.6	1	1	843	1559	1559	MAX_20210209_lariat_box484_ex259a_4_w2SpinningDisc - Red.tif	BOX759
1560	2	458.773	259.996	2	1	1	456	256	462	262	10	22621.4	9085.75	1	1	845	1560	1560	MAX_20210209_lariat_box484_ex259a_4_w2SpinningDisc - Red.tif	BOX759
1561	2	459.748	172.596	2	1	1	456	170	462	174	5	3011.75	2751.5	1	1	844	1561	1561	MAX_20210209_lariat_box484_ex259a_4_w2SpinningDisc - Red.tif	BOX759
1562	2	462.147	191.213	2	1	1	459	187	465	194	11	31064.5	12928.9	1	1	850	1562	1562	MAX_20210209_lariat_box484_ex259a_4_w2SpinningDisc - Red.tif	BOX759
1563	2	463.994	206.933	2	1	1	462	203	466	209	5	9780.75	4101.5	1	1	854	1563	1563	MAX_20210209_lariat_box484_ex259a_4_w2SpinningDisc - Red.tif	BOX759
1564	2	464.464	131.457	2	1	1	462	129	466	133	4	4827.56	2791.69	1	1	853	1564	1564	MAX_20210209_lariat_box484_ex259a_4_w2SpinningDisc - Red.tif	BOX759
1565	2	465.497	253.468	2	1	1	463	250	469	255	8	22631	6720.91	1	1	858	1565	1565	MAX_20210209_lariat_box484_ex259a_4_w2SpinningDisc - Red.tif	BOX759
1566	2	465.471	144.538	2	1	1	463	141	467	151	4	27107.7	7784.04	1	1	857	1566	1566	MAX_20210209_lariat_box484_ex259a_4_w2SpinningDisc - Red.tif	BOX759
1567	2	465.609	149.234	2	1	1	464	148	467	151	3	221.333	1145.33	0	1	0	1567	1567	MAX_20210209_lariat_box484_ex259a_4_w2SpinningDisc - Red.tif	BOX759
1568	2	469.16	195.615	2	1	1	465	192	471	198	5	16695.3	5085.12	1	1	860	1568	1568	MAX_20210209_lariat_box484_ex259a_4_w2SpinningDisc - Red.tif	BOX759
1569	2	470.756	239.998	2	1	1	468	236	473	242	4	12942.5	3081.64	1	1	864	1569	1569	MAX_20210209_lariat_box484_ex259a_4_w2SpinningDisc - Red.tif	BOX759
1570	2	472.01	227.027	2	1	1	470	223	474	229	5	14226.8	4942	1	1	869	1570	1570	MAX_20210209_lariat_box484_ex259a_4_w2SpinningDisc - Red.tif	BOX759
1571	2	471.492	234.497	2	1	1	469	231	474	236	4	11087.6	3653.4	1	1	867	1571	1571	MAX_20210209_lariat_box484_ex259a_4_w2SpinningDisc - Red.tif	BOX759
1572	2	474.418	142.483	2	1	1	471	139	476	144	4	14549.8	3490.8	1	1	870	1572	1572	MAX_20210209_lariat_box484_ex259a_4_w2SpinningDisc - Red.tif	BOX759
1573	2	476.167	228.998	2	1	1	474	225	479	231	10	22136.2	9146.82	1	1	875	1573	1573	MAX_20210209_lariat_box484_ex259a_4_w2SpinningDisc - Red.tif	BOX759
1574	2	476.543	591.779	2	1	1	474	586	479	596	13	27069.8	13401.4	1	1	876	1574	1574	MAX_20210209_lariat_box484_ex259a_4_w2SpinningDisc - Red.tif	BOX759
1575	2	477.949	167.309	2	1	1	475	164	480	169	7	14812	5317	1	1	877	1575	1575	MAX_20210209_lariat_box484_ex259a_4_w2SpinningDisc - Red.tif	BOX759
1576	2	478.142	209.76	2	1	1	476	206	481	212	6	12251.4	5598.73	1	1	879	1576	1576	MAX_20210209_lariat_box484_ex259a_4_w2SpinningDisc - Red.tif	BOX759
1577	2	478.448	214.463	2	1	1	476	211	481	216	4	13254.8	5461.6	1	1	880	1577	1577	MAX_20210209_lariat_box484_ex259a_4_w2SpinningDisc - Red.tif	BOX759
1578	2	480.512	190.457	2	1	1	478	186	482	192	4	14233.8	3358.5	1	1	882	1578	1578	MAX_20210209_lariat_box484_ex259a_4_w2SpinningDisc - Red.tif	BOX759
1579	2	482.431	561.751	2	1	1	480	558	485	565	12	21624	12036	1	1	886	1579	1579	MAX_20210209_lariat_box484_ex259a_4_w2SpinningDisc - Red.tif	BOX759
1580	2	482.491	544.573	2	1	1	481	541	485	547	8	12236.2	6285.75	1	1	890	1580	1580	MAX_20210209_lariat_box484_ex259a_4_w2SpinningDisc - Red.tif	BOX759
1581	2	484.152	157.152	2	1	1	481	154	486	159	8	12154.6	5509.6	1	1	888	1581	1581	MAX_20210209_lariat_box484_ex259a_4_w2SpinningDisc - Red.tif	BOX759
1582	2	483.741	183.278	2	1	1	481	179	486	186	8	23729	7602	1	1	889	1582	1582	MAX_20210209_lariat_box484_ex259a_4_w2SpinningDisc - Red.tif	BOX759
1583	2	484.46	147.51	2	1	1	481	143	486	149	4	12497.9	3811.09	1	1	887	1583	1583	MAX_20210209_lariat_box484_ex259a_4_w2SpinningDisc - Red.tif	BOX759
1584	2	485.697	516.373	2	1	1	484	513	488	518	3	7751.67	3085.33	1	1	896	1584	1584	MAX_20210209_lariat_box484_ex259a_4_w2SpinningDisc - Red.tif	BOX759
1585	2	485.421	521.707	2	1	1	483	518	487	525	9	12771.5	6917.73	1	1	894	1585	1585	MAX_20210209_lariat_box484_ex259a_4_w2SpinningDisc - Red.tif	BOX759
1586	2	487.508	197.96	2	1	1	484	190	490	200	8	33881.2	12162.4	1	1	895	1586	1586	MAX_20210209_lariat_box484_ex259a_4_w2SpinningDisc - Red.tif	BOX759
1587	2	488.642	503.654	2	1	1	487	500	491	505	3	6965.67	3394.67	1	1	903	1587	1587	MAX_20210209_lariat_box484_ex259a_4_w2SpinningDisc - Red.tif	BOX759
1588	2	488.474	539.49	2	1	1	486	535	491	541	4	11922.6	2483.36	1	1	900	1588	1588	MAX_20210209_lariat_box484_ex259a_4_w2SpinningDisc - Red.tif	BOX759
1589	2	490.215	499.077	2	1	1	487	495	493	501	8	18785.1	6488.58	1	1	902	1589	1589	MAX_20210209_lariat_box484_ex259a_4_w2SpinningDisc - Red.tif	BOX759
1590	2	490	509.979	2	1	1	488	506	492	512	3	5678.5	3682	1	1	904	1590	1590	MAX_20210209_lariat_box484_ex259a_4_w2SpinningDisc - Red.tif	BOX759
1591	2	491.553	169.468	2	1	1	489	165	494	171	4	12651.1	3847.45	1	1	906	1591	1591	MAX_20210209_lariat_box484_ex259a_4_w2SpinningDisc - Red.tif	BOX759
1592	2	492.922	94.6646	2	1	1	490	91	495	97	7	15228.9	6469	1	1	907	1592	1592	MAX_20210209_lariat_box484_ex259a_4_w2SpinningDisc - Red.tif	BOX759
1593	2	493.218	141.761	2	1	1	490	138	495	144	6	11779.9	5023.82	1	1	909	1593	1593	MAX_20210209_lariat_box484_ex259a_4_w2SpinningDisc - Red.tif	BOX759
1594	2	496.131	177.827	2	1	1	493	173	501	180	6	25804.4	10386	1	1	912	1594	1594	MAX_20210209_lariat_box484_ex259a_4_w2SpinningDisc - Red.tif	BOX759
1595	2	495.303	469.566	2	1	1	493	466	498	472	6	11047.7	6504.91	1	1	913	1595	1595	MAX_20210209_lariat_box484_ex259a_4_w2SpinningDisc - Red.tif	BOX759
1596	2	496.494	454.019	2	1	1	495	451	499	457	6	7683.25	4609.75	1	1	915	1596	1596	MAX_20210209_lariat_box484_ex259a_4_w2SpinningDisc - Red.tif	BOX759
1597	2	498.774	446.482	2	1	1	495	444	502	449	6	14706	7317	1	1	914	1597	1597	MAX_20210209_lariat_box484_ex259a_4_w2SpinningDisc - Red.tif	BOX759
1598	2	500.009	159.018	2	1	1	497	155	502	161	5	17675.7	3951.64	1	1	922	1598	1598	MAX_20210209_lariat_box484_ex259a_4_w2SpinningDisc - Red.tif	BOX759
1599	2	500.841	133.644	2	1	1	497	130	503	136	9	31042.7	10821.5	1	1	921	1599	1599	MAX_20210209_lariat_box484_ex259a_4_w2SpinningDisc - Red.tif	BOX759
1600	2	502.348	427.245	2	1	1	500	425	504	429	3	5672.25	3468.62	1	1	923	1600	1600	MAX_20210209_lariat_box484_ex259a_4_w2SpinningDisc - Red.tif	BOX759
1601	2	505.578	120.48	2	1	1	503	117	508	122	4	17494.8	4107.6	1	1	926	1601	1601	MAX_20210209_lariat_box484_ex259a_4_w2SpinningDisc - Red.tif	BOX759
1602	2	509.831	372.093	2	1	1	507	370	514	375	8	19738	9339	1	1	931	1602	1602	MAX_20210209_lariat_box484_ex259a_4_w2SpinningDisc - Red.tif	BOX759
1603	2	511.148	336.602	2	1	1	509	333	514	339	9	14698	7058.18	1	1	937	1603	1603	MAX_20210209_lariat_box484_ex259a_4_w2SpinningDisc - Red.tif	BOX759
1604	2	510.987	350.386	2	1	1	509	347	513	353	8	11123	6318.5	1	1	938	1604	1604	MAX_20210209_lariat_box484_ex259a_4_w2SpinningDisc - Red.tif	BOX759
1605	2	511.057	386.254	2	1	1	509	384	517	389	7	16814.1	9295.62	1	1	940	1605	1605	MAX_20210209_lariat_box484_ex259a_4_w2SpinningDisc - Red.tif	BOX759
1606	2	511.084	393.495	2	1	1	508	389	514	396	6	14091.7	7612.69	1	1	934	1606	1606	MAX_20210209_lariat_box484_ex259a_4_w2SpinningDisc - Red.tif	BOX759
1607	2	512.313	328.321	2	1	1	510	325	515	330	3	10185.6	4339.4	1	1	942	1607	1607	MAX_20210209_lariat_box484_ex259a_4_w2SpinningDisc - Red.tif	BOX759
1608	2	516.032	109.468	2	1	1	512	106	518	114	8	28007.8	8679	1	1	943	1608	1608	MAX_20210209_lariat_box484_ex259a_4_w2SpinningDisc - Red.tif	BOX759
1609	2	515.306	141.483	2	1	1	513	137	517	144	6	14525.6	4324.45	1	1	944	1609	1609	MAX_20210209_lariat_box484_ex259a_4_w2SpinningDisc - Red.tif	BOX759
1610	2	517.459	319.99	2	1	1	515	316	521	322	8	14841.6	6417.79	1	1	948	1610	1610	MAX_20210209_lariat_box484_ex259a_4_w2SpinningDisc - Red.tif	BOX759
1611	2	518.924	357.462	2	1	1	515	354	522	360	7	22533.9	9770.85	1	1	949	1611	1611	MAX_20210209_lariat_box484_ex259a_4_w2SpinningDisc - Red.tif	BOX759
1612	2	518.661	62.8974	2	1	1	516	59	521	65	7	11349	5613.36	1	1	951	1612	1612	MAX_20210209_lariat_box484_ex259a_4_w2SpinningDisc - Red.tif	BOX759
1613	2	520.073	307.89	2	1	1	518	304	523	310	8	14881.4	6940.09	1	1	957	1613	1613	MAX_20210209_lariat_box484_ex259a_4_w2SpinningDisc - Red.tif	BOX759
1614	2	520.529	345.444	2	1	1	519	341	523	347	4	11038.2	3241.75	1	1	959	1614	1614	MAX_20210209_lariat_box484_ex259a_4_w2SpinningDisc - Red.tif	BOX759
1615	2	521.668	364.665	2	1	1	520	362	523	366	3	4052.14	2075.71	1	1	961	1615	1615	MAX_20210209_lariat_box484_ex259a_4_w2SpinningDisc - Red.tif	BOX759
1616	2	524.482	346.469	2	1	1	523	344	527	348	4	5892.12	2275	1	1	968	1616	1616	MAX_20210209_lariat_box484_ex259a_4_w2SpinningDisc - Red.tif	BOX759
1617	2	524.497	354.018	2	1	1	523	351	527	357	6	5693	4699	1	1	969	1617	1617	MAX_20210209_lariat_box484_ex259a_4_w2SpinningDisc - Red.tif	BOX759
1618	2	526.675	307.004	2	1	1	524	303	530	309	7	14001.2	7414.29	1	1	971	1618	1618	MAX_20210209_lariat_box484_ex259a_4_w2SpinningDisc - Red.tif	BOX759
1619	2	527.951	46.2671	2	1	1	525	43	530	48	7	16166.4	5955.8	1	1	972	1619	1619	MAX_20210209_lariat_box484_ex259a_4_w2SpinningDisc - Red.tif	BOX759
1620	2	527.486	287.989	2	1	1	526	284	531	290	6	8413.64	4814.09	1	1	976	1620	1620	MAX_20210209_lariat_box484_ex259a_4_w2SpinningDisc - Red.tif	BOX759
1621	2	528.167	316.689	2	1	1	525	314	531	320	7	15404.4	6350.71	1	1	974	1621	1621	MAX_20210209_lariat_box484_ex259a_4_w2SpinningDisc - Red.tif	BOX759
1622	2	530.76	333.418	2	1	1	529	330	534	335	5	12811.2	4417.6	1	1	982	1622	1622	MAX_20210209_lariat_box484_ex259a_4_w2SpinningDisc - Red.tif	BOX759
1623	2	532.334	296.96	2	1	1	530	292	535	299	7	10206	5875	1	1	984	1623	1623	MAX_20210209_lariat_box484_ex259a_4_w2SpinningDisc - Red.tif	BOX759
1624	2	534.738	310.015	2	1	1	533	305	537	312	4	9536.82	3298.18	1	1	989	1624	1624	MAX_20210209_lariat_box484_ex259a_4_w2SpinningDisc - Red.tif	BOX759
1625	2	535.511	291.437	2	1	1	534	287	538	293	4	8947	2869.5	1	1	993	1625	1625	MAX_20210209_lariat_box484_ex259a_4_w2SpinningDisc - Red.tif	BOX759
1626	2	537.498	258.933	2	1	1	535	253	540	261	6	21185.1	5916	1	1	996	1626	1626	MAX_20210209_lariat_box484_ex259a_4_w2SpinningDisc - Red.tif	BOX759
1627	2	538.72	36.6559	2	1	1	536	33	541	38	3	9004.8	2415.2	1	1	997	1627	1627	MAX_20210209_lariat_box484_ex259a_4_w2SpinningDisc - Red.tif	BOX759
1628	2	541.001	249.646	2	1	1	539	245	544	252	7	19866	7903	1	1	1003	1628	1628	MAX_20210209_lariat_box484_ex259a_4_w2SpinningDisc - Red.tif	BOX759
1629	2	546	269.987	2	1	1	544	265	549	272	3	15753	4043	1	1	1010	1629	1629	MAX_20210209_lariat_box484_ex259a_4_w2SpinningDisc - Red.tif	BOX759
1630	2	548.329	21.3325	2	1	1	546	18	550	23	3	8774.67	2993.33	1	1	1013	1630	1630	MAX_20210209_lariat_box484_ex259a_4_w2SpinningDisc - Red.tif	BOX759
1631	2	549.47	33.5408	2	1	1	546	30	551	35	4	14782.2	3390	1	1	1014	1631	1631	MAX_20210209_lariat_box484_ex259a_4_w2SpinningDisc - Red.tif	BOX759
1632	2	553.446	20.4614	2	1	1	551	17	556	23	4	16656.3	4868.09	1	1	1021	1632	1632	MAX_20210209_lariat_box484_ex259a_4_w2SpinningDisc - Red.tif	BOX759
1633	2	555.215	230.213	2	1	1	552	226	557	232	6	18797.7	5713.18	1	1	1023	1633	1633	MAX_20210209_lariat_box484_ex259a_4_w2SpinningDisc - Red.tif	BOX759
1634	2	561.995	47.7034	2	1	1	559	44	564	50	7	22351.3	7077.73	1	1	1031	1634	1634	MAX_20210209_lariat_box484_ex259a_4_w2SpinningDisc - Red.tif	BOX759
1635	2	566.282	180.371	2	1	1	564	177	569	182	3	9278.4	3225.2	1	1	1038	1635	1635	MAX_20210209_lariat_box484_ex259a_4_w2SpinningDisc - Red.tif	BOX759
1636	2	573.17	23.6065	2	1	1	570	20	575	25	5	13303.2	2827.2	1	1	1047	1636	1636	MAX_20210209_lariat_box484_ex259a_4_w2SpinningDisc - Red.tif	BOX759
1637	2	610.076	97.6553	2	1	1	608	94	613	100	7	15970.1	6119.27	1	1	1077	1637	1637	MAX_20210209_lariat_box484_ex259a_4_w2SpinningDisc - Red.tif	BOX759
1638	2	610.421	264.388	2	1	1	608	259	615	267	10	25704.2	11548.2	1	1	1078	1638	1638	MAX_20210209_lariat_box484_ex259a_4_w2SpinningDisc - Red.tif	BOX759
1639	2	611.263	87.9931	2	1	1	609	84	613	90	4	12675.5	3414.5	1	1	1079	1639	1639	MAX_20210209_lariat_box484_ex259a_4_w2SpinningDisc - Red.tif	BOX759
1640	2	617.389	246.275	2	1	1	614	242	620	250	14	22903	12968.2	0	1	0	1640	1640	MAX_20210209_lariat_box484_ex259a_4_w2SpinningDisc - Red.tif	BOX759
1641	2	624.864	225.223	2	1	1	622	221	628	227	4	10544.1	5576.25	1	1	1084	1641	1641	MAX_20210209_lariat_box484_ex259a_4_w2SpinningDisc - Red.tif	BOX759
1642	2	627	43.3763	2	1	1	625	40	629	46	4	6461.75	4271.25	1	1	1086	1642	1642	MAX_20210209_lariat_box484_ex259a_4_w2SpinningDisc - Red.tif	BOX759
1643	2	634.258	219.634	2	1	1	630	215	637	222	8	23804.9	11458	1	1	1094	1643	1643	MAX_20210209_lariat_box484_ex259a_4_w2SpinningDisc - Red.tif	BOX759
1644	2	632.998	227.532	2	1	1	631	224	636	230	8	14268.8	5782.18	1	1	1096	1644	1644	MAX_20210209_lariat_box484_ex259a_4_w2SpinningDisc - Red.tif	BOX759
1645	2	633.305	53.7021	2	1	1	630	50	635	55	3	11004.8	3532.8	1	1	1091	1645	1645	MAX_20210209_lariat_box484_ex259a_4_w2SpinningDisc - Red.tif	BOX759
1646	2	635.58	213.216	2	1	1	634	211	637	215	5	1583.57	2119.71	0	1	0	1646	1646	MAX_20210209_lariat_box484_ex259a_4_w2SpinningDisc - Red.tif	BOX759
1647	2	636.457	208.512	2	1	1	634	204	639	214	4	29216	7945.8	1	1	1097	1647	1647	MAX_20210209_lariat_box484_ex259a_4_w2SpinningDisc - Red.tif	BOX759
1648	2	640.963	199.502	2	1	1	638	195	644	202	8	24765.4	10799.3	1	1	1099	1648	1648	MAX_20210209_lariat_box484_ex259a_4_w2SpinningDisc - Red.tif	BOX759
1649	2	647.016	190.799	2	1	1	644	187	650	193	12	44533.3	16470.5	1	1	1111	1649	1649	MAX_20210209_lariat_box484_ex259a_4_w2SpinningDisc - Red.tif	BOX759
1650	2	667.021	158.005	2	1	1	664	154	670	160	9	26414.3	8704.04	1	1	1128	1650	1650	MAX_20210209_lariat_box484_ex259a_4_w2SpinningDisc - Red.tif	BOX759
1651	2	673.505	166.517	2	1	1	671	162	676	168	4	10401.7	3740.73	1	1	1132	1651	1651	MAX_20210209_lariat_box484_ex259a_4_w2SpinningDisc - Red.tif	BOX759
1652	2	679.318	65.312	2	1	1	677	62	682	67	3	11197.8	3710.8	1	1	1136	1652	1652	MAX_20210209_lariat_box484_ex259a_4_w2SpinningDisc - Red.tif	BOX759
1653	2	690.742	45.1261	2	1	1	686	42	695	47	6	26225	9019.29	1	1	1143	1653	1653	MAX_20210209_lariat_box484_ex259a_4_w2SpinningDisc - Red.tif	BOX759
1654	2	691.814	116.496	2	1	1	689	112	695	119	10	28879.3	12439.8	1	1	1149	1654	1654	MAX_20210209_lariat_box484_ex259a_4_w2SpinningDisc - Red.tif	BOX759
1655	2	694.5	121.898	2	1	1	693	119	697	124	6	9052.67	4767.67	1	1	1152	1655	1655	MAX_20210209_lariat_box484_ex259a_4_w2SpinningDisc - Red.tif	BOX759
1656	2	700.54	85.2388	2	1	1	698	82	703	88	7	24915.9	7689.36	1	1	1156	1656	1656	MAX_20210209_lariat_box484_ex259a_4_w2SpinningDisc - Red.tif	BOX759
1657	2	701.53	81.4263	2	1	1	700	80	703	83	4	-493.667	1661	0	1	0	1657	1657	MAX_20210209_lariat_box484_ex259a_4_w2SpinningDisc - Red.tif	BOX759
1658	2	715.585	81.2449	2	1	1	713	78	718	83	5	12208.6	5741.4	1	1	1167	1658	1658	MAX_20210209_lariat_box484_ex259a_4_w2SpinningDisc - Red.tif	BOX759
1659	2	718.478	43.5046	2	1	1	717	39	720	45	4	2911.11	1783.89	1	1	1169	1659	1659	MAX_20210209_lariat_box484_ex259a_4_w2SpinningDisc - Red.tif	BOX759
1660	2	720.752	58.8547	2	1	1	717	55	724	62	13	63803.3	26412.9	1	1	1171	1660	1660	MAX_20210209_lariat_box484_ex259a_4_w2SpinningDisc - Red.tif	BOX759
1	1	15.4961	199.512	1	1	1	14	198	17	201	4	2159	663	1	0	1	0	1	MAX_20210209_lariat_box484_ex259a_6_w1SpinningDisc - Green.tif	BOX759
2	1	19.6849	197.578	1	1	1	17	195	22	200	13	12433.2	5614.8	1	1	2	817	2	MAX_20210209_lariat_box484_ex259a_6_w1SpinningDisc - Green.tif	BOX759
3	1	20.6175	191.374	1	1	1	18	189	23	194	15	28731.6	14534.2	1	1	3	816	3	MAX_20210209_lariat_box484_ex259a_6_w1SpinningDisc - Green.tif	BOX759
4	1	21.1742	134.486	1	1	1	19	129	23	138	14	9473.46	4013.23	1	0	4	0	4	MAX_20210209_lariat_box484_ex259a_6_w1SpinningDisc - Green.tif	BOX759
5	1	21.8102	85.2876	1	1	1	20	83	24	88	11	10658.7	3190	1	0	5	0	5	MAX_20210209_lariat_box484_ex259a_6_w1SpinningDisc - Green.tif	BOX759
6	1	22.4426	99.8576	1	1	1	20	98	25	102	8	5828	1918.33	1	0	6	0	6	MAX_20210209_lariat_box484_ex259a_6_w1SpinningDisc - Green.tif	BOX759
7	1	21.7159	122.162	1	1	1	20	120	24	125	8	5057	1525	1	0	7	0	7	MAX_20210209_lariat_box484_ex259a_6_w1SpinningDisc - Green.tif	BOX759
8	1	23.2348	94.7272	1	1	1	21	92	26	98	14	21487	10028.8	1	1	8	818	8	MAX_20210209_lariat_box484_ex259a_6_w1SpinningDisc - Green.tif	BOX759
9	1	25.4529	184.426	1	1	1	23	182	28	187	12	21350.6	6935.6	1	1	9	819	9	MAX_20210209_lariat_box484_ex259a_6_w1SpinningDisc - Green.tif	BOX759
10	1	27.8853	90.8223	1	1	1	26	89	30	92	4	1911	173.143	1	0	10	0	10	MAX_20210209_lariat_box484_ex259a_6_w1SpinningDisc - Green.tif	BOX759
11	1	29.3803	114.937	1	1	1	26	112	32	118	17	20906.6	5479.96	1	0	11	0	11	MAX_20210209_lariat_box484_ex259a_6_w1SpinningDisc - Green.tif	BOX759
12	1	27.8222	130.806	1	1	1	26	129	30	133	6	3643.19	1376.19	1	0	12	0	12	MAX_20210209_lariat_box484_ex259a_6_w1SpinningDisc - Green.tif	BOX759
13	1	30.8269	200.697	1	1	1	29	198	33	203	9	5638	886.333	1	0	13	0	13	MAX_20210209_lariat_box484_ex259a_6_w1SpinningDisc - Green.tif	BOX759
14	1	33.9673	92.2801	1	1	1	31	88	37	95	15	11832.9	4987.31	1	0	14	0	14	MAX_20210209_lariat_box484_ex259a_6_w1SpinningDisc - Green.tif	BOX759
15	1	34.1576	126.645	1	1	1	32	125	36	129	6	3469	452.938	1	0	15	0	15	MAX_20210209_lariat_box484_ex259a_6_w1SpinningDisc - Green.tif	BOX759
16	1	34.9276	182.511	1	1	1	33	181	37	184	6	2765.57	1019.29	1	0	16	0	16	MAX_20210209_lariat_box484_ex259a_6_w1SpinningDisc - Green.tif	BOX759
17	1	35.7292	187.803	1	1	1	33	185	38	191	14	23423	10365.1	1	1	17	820	17	MAX_20210209_lariat_box484_ex259a_6_w1SpinningDisc - Green.tif	BOX759
18	1	36.4549	173.338	1	1	1	34	171	39	176	11	8178.2	2411.6	1	0	18	0	18	MAX_20210209_lariat_box484_ex259a_6_w1SpinningDisc - Green.tif	BOX759
19	1	37.5933	84.2626	1	1	1	35	82	40	87	10	7750	2771.8	1	0	19	0	19	MAX_20210209_lariat_box484_ex259a_6_w1SpinningDisc - Green.tif	BOX759
20	1	40.8537	116.189	1	1	1	38	114	43	119	11	9524.2	3405.2	1	0	20	0	20	MAX_20210209_lariat_box484_ex259a_6_w1SpinningDisc - Green.tif	BOX759
21	1	41.801	99.6263	1	1	1	39	97	44	103	15	24254	9336.45	1	1	21	821	21	MAX_20210209_lariat_box484_ex259a_6_w1SpinningDisc - Green.tif	BOX759
22	1	41.4419	177.794	1	1	1	39	175	44	181	14	16445.6	6503.27	1	1	22	822	22	MAX_20210209_lariat_box484_ex259a_6_w1SpinningDisc - Green.tif	BOX759
23	1	42.1213	162.973	1	1	1	40	160	45	166	12	11548.9	4392.64	1	0	23	0	23	MAX_20210209_lariat_box484_ex259a_6_w1SpinningDisc - Green.tif	BOX759
24	1	43.854	90.3186	1	1	1	42	88	46	93	9	5037.67	1527	1	0	24	0	24	MAX_20210209_lariat_box484_ex259a_6_w1SpinningDisc - Green.tif	BOX759
25	1	44	195.451	1	1	1	43	193	45	198	4	849.143	126.286	1	0	25	0	25	MAX_20210209_lariat_box484_ex259a_6_w1SpinningDisc - Green.tif	BOX759
26	1	47.826	170.786	1	1	1	45	168	51	174	17	41940.4	19044.5	1	1	26	825	26	MAX_20210209_lariat_box484_ex259a_6_w1SpinningDisc - Green.tif	BOX759
27	1	48.6981	89.2643	1	1	1	47	88	50	91	3	1557.33	588.667	1	0	27	0	27	MAX_20210209_lariat_box484_ex259a_6_w1SpinningDisc - Green.tif	BOX759
28	1	49.8015	153.405	1	1	1	47	151	53	156	15	30052.7	14951.5	1	1	28	826	28	MAX_20210209_lariat_box484_ex259a_6_w1SpinningDisc - Green.tif	BOX759
29	1	50.6264	180.81	1	1	1	48	178	53	184	15	31466.5	14169.9	1	1	29	827	29	MAX_20210209_lariat_box484_ex259a_6_w1SpinningDisc - Green.tif	BOX759
30	1	51.7182	130.592	1	1	1	49	127	55	134	18	20455.1	7076	1	0	30	0	30	MAX_20210209_lariat_box484_ex259a_6_w1SpinningDisc - Green.tif	BOX759
31	1	51.6557	121.817	1	1	1	50	120	54	124	8	8522.69	2082.88	1	0	31	0	31	MAX_20210209_lariat_box484_ex259a_6_w1SpinningDisc - Green.tif	BOX759
32	1	53.4087	77.1211	1	1	1	51	75	56	80	9	9318.6	3281	1	0	32	0	32	MAX_20210209_lariat_box484_ex259a_6_w1SpinningDisc - Green.tif	BOX759
33	1	52.4908	140.507	1	1	1	51	139	54	142	4	1537	473.333	1	0	33	0	33	MAX_20210209_lariat_box484_ex259a_6_w1SpinningDisc - Green.tif	BOX759
34	1	52.4857	192.937	1	1	1	51	191	54	195	6	3279	708.714	1	0	34	0	34	MAX_20210209_lariat_box484_ex259a_6_w1SpinningDisc - Green.tif	BOX759
35	1	53.9479	71.1054	1	1	1	52	69	56	74	10	7620.33	2068	1	0	35	0	35	MAX_20210209_lariat_box484_ex259a_6_w1SpinningDisc - Green.tif	BOX759
36	1	55.5446	113.625	1	1	1	53	111	58	117	13	11240.9	5288.27	1	0	36	0	36	MAX_20210209_lariat_box484_ex259a_6_w1SpinningDisc - Green.tif	BOX759
37	1	56.0909	185.816	1	1	1	54	183	58	189	10	9090.75	2949.5	1	0	37	0	37	MAX_20210209_lariat_box484_ex259a_6_w1SpinningDisc - Green.tif	BOX759
38	1	56.2371	198.104	1	1	1	54	195	59	201	13	11435.7	5773.27	1	1	38	828	38	MAX_20210209_lariat_box484_ex259a_6_w1SpinningDisc - Green.tif	BOX759
39	1	58.0565	157.213	1	1	1	56	155	60	160	10	9882.33	3360.67	1	0	39	0	39	MAX_20210209_lariat_box484_ex259a_6_w1SpinningDisc - Green.tif	BOX759
40	1	60.2194	126.276	1	1	1	59	124	62	128	4	2174.71	569.571	1	0	40	0	40	MAX_20210209_lariat_box484_ex259a_6_w1SpinningDisc - Green.tif	BOX759
41	1	61.1386	167.262	1	1	1	59	165	63	170	9	5290	1793.67	1	0	41	0	41	MAX_20210209_lariat_box484_ex259a_6_w1SpinningDisc - Green.tif	BOX759
42	1	62.5115	175.976	1	1	1	60	173	65	179	16	50118.2	22228.7	1	1	42	829	42	MAX_20210209_lariat_box484_ex259a_6_w1SpinningDisc - Green.tif	BOX759
43	1	63.4366	151.546	1	1	1	61	149	66	154	12	13304.6	6224.8	1	1	43	830	43	MAX_20210209_lariat_box484_ex259a_6_w1SpinningDisc - Green.tif	BOX759
44	1	65.0896	96.5199	1	1	1	62	94	68	100	16	26985	9961.04	1	1	44	831	44	MAX_20210209_lariat_box484_ex259a_6_w1SpinningDisc - Green.tif	BOX759
45	1	64.3104	123.873	1	1	1	62	122	67	126	9	8387.67	2272.33	1	0	45	0	45	MAX_20210209_lariat_box484_ex259a_6_w1SpinningDisc - Green.tif	BOX759
46	1	64.8825	194.272	1	1	1	63	192	67	197	9	6157	2366.67	1	0	46	0	46	MAX_20210209_lariat_box484_ex259a_6_w1SpinningDisc - Green.tif	BOX759
47	1	66.9308	85.5682	1	1	1	64	83	70	89	17	34733.6	11776.2	1	1	47	832	47	MAX_20210209_lariat_box484_ex259a_6_w1SpinningDisc - Green.tif	BOX759
48	1	66.0334	118.72	1	1	1	64	117	68	121	7	4295.88	953.438	1	0	48	0	48	MAX_20210209_lariat_box484_ex259a_6_w1SpinningDisc - Green.tif	BOX759
49	1	66.0635	140.079	1	1	1	64	138	68	143	10	6660.33	2324.33	1	0	49	0	49	MAX_20210209_lariat_box484_ex259a_6_w1SpinningDisc - Green.tif	BOX759
50	1	66.9074	112.495	1	1	1	65	111	69	114	6	2562.14	643.571	1	0	50	0	50	MAX_20210209_lariat_box484_ex259a_6_w1SpinningDisc - Green.tif	BOX759
51	1	68.9666	133.23	1	1	1	67	131	71	136	10	7967.67	3401	1	0	51	0	51	MAX_20210209_lariat_box484_ex259a_6_w1SpinningDisc - Green.tif	BOX759
52	1	72.3185	151.458	1	1	1	70	149	75	155	14	20542.5	10656.4	1	1	52	833	52	MAX_20210209_lariat_box484_ex259a_6_w1SpinningDisc - Green.tif	BOX759
53	1	72.1215	182.946	1	1	1	70	181	74	185	7	7108.62	1779.19	1	0	53	0	53	MAX_20210209_lariat_box484_ex259a_6_w1SpinningDisc - Green.tif	BOX759
54	1	73.0514	78.1262	1	1	1	71	76	75	81	10	6815.33	2320	1	0	54	0	54	MAX_20210209_lariat_box484_ex259a_6_w1SpinningDisc - Green.tif	BOX759
55	1	74.2577	158.778	1	1	1	72	156	77	162	16	24764.3	11068.2	1	1	55	834	55	MAX_20210209_lariat_box484_ex259a_6_w1SpinningDisc - Green.tif	BOX759
56	1	74.7327	119.523	1	1	1	73	117	77	122	10	5770.67	2207.67	1	0	56	0	56	MAX_20210209_lariat_box484_ex259a_6_w1SpinningDisc - Green.tif	BOX759
57	1	75.8523	185.038	1	1	1	74	180	78	189	18	19486.8	8071	1	1	57	835	57	MAX_20210209_lariat_box484_ex259a_6_w1SpinningDisc - Green.tif	BOX759
58	1	76.9494	71.6078	1	1	1	75	67	79	76	17	10619.4	4352.08	1	0	58	0	58	MAX_20210209_lariat_box484_ex259a_6_w1SpinningDisc - Green.tif	BOX759
59	1	78.4839	169.932	1	1	1	76	167	81	174	15	18125	7683	1	1	59	837	59	MAX_20210209_lariat_box484_ex259a_6_w1SpinningDisc - Green.tif	BOX759
60	1	80.0216	131.369	1	1	1	77	128	83	135	18	40115	20961.5	1	1	60	836	60	MAX_20210209_lariat_box484_ex259a_6_w1SpinningDisc - Green.tif	BOX759
61	1	78.7085	191.904	1	1	1	77	190	81	194	7	5320.06	688.688	1	0	61	0	61	MAX_20210209_lariat_box484_ex259a_6_w1SpinningDisc - Green.tif	BOX759
62	1	81.01	110.31	1	1	1	78	107	84	114	22	27536.5	8266.62	1	0	62	0	62	MAX_20210209_lariat_box484_ex259a_6_w1SpinningDisc - Green.tif	BOX759
63	1	80.7606	161.789	1	1	1	78	158	83	166	19	20910.6	12070.9	1	1	63	838	63	MAX_20210209_lariat_box484_ex259a_6_w1SpinningDisc - Green.tif	BOX759
64	1	81.6818	76.9291	1	1	1	80	75	84	79	7	4644.94	1214.25	1	0	64	0	64	MAX_20210209_lariat_box484_ex259a_6_w1SpinningDisc - Green.tif	BOX759
65	1	84.6437	128.774	1	1	1	83	126	87	131	8	6971	3035	1	0	65	0	65	MAX_20210209_lariat_box484_ex259a_6_w1SpinningDisc - Green.tif	BOX759
66	1	84.8282	184.306	1	1	1	83	182	87	187	9	8209.33	3125	1	0	66	0	66	MAX_20210209_lariat_box484_ex259a_6_w1SpinningDisc - Green.tif	BOX759
67	1	87.846	73.1051	1	1	1	85	71	90	76	11	11076.6	3086.8	1	0	67	0	67	MAX_20210209_lariat_box484_ex259a_6_w1SpinningDisc - Green.tif	BOX759
68	1	87.9895	81.5093	1	1	1	86	79	90	84	12	11233.7	3737	1	0	68	0	68	MAX_20210209_lariat_box484_ex259a_6_w1SpinningDisc - Green.tif	BOX759
69	1	88.6896	95.1481	1	1	1	86	93	91	98	13	13174.8	7585.4	1	1	69	839	69	MAX_20210209_lariat_box484_ex259a_6_w1SpinningDisc - Green.tif	BOX759
70	1	88.2668	167.867	1	1	1	86	166	90	170	8	6744.62	1852.69	1	0	70	0	70	MAX_20210209_lariat_box484_ex259a_6_w1SpinningDisc - Green.tif	BOX759
71	1	88.6919	119.922	1	1	1	87	118	91	122	7	4124.25	1236.62	1	0	71	0	71	MAX_20210209_lariat_box484_ex259a_6_w1SpinningDisc - Green.tif	BOX759
72	1	90.4342	111.701	1	1	1	88	109	93	115	11	10019.8	3114	1	0	72	0	72	MAX_20210209_lariat_box484_ex259a_6_w1SpinningDisc - Green.tif	BOX759
73	1	91.6726	185.541	1	1	1	89	183	94	188	13	14750	4277.6	1	0	73	0	73	MAX_20210209_lariat_box484_ex259a_6_w1SpinningDisc - Green.tif	BOX759
74	1	91.6309	90.9848	1	1	1	90	89	94	93	7	6438.31	1912.25	1	0	74	0	74	MAX_20210209_lariat_box484_ex259a_6_w1SpinningDisc - Green.tif	BOX759
75	1	92.666	142.877	1	1	1	90	140	96	146	16	40018.3	16957.2	1	1	75	840	75	MAX_20210209_lariat_box484_ex259a_6_w1SpinningDisc - Green.tif	BOX759
76	1	93.068	171.396	1	1	1	90	168	96	175	17	36334.5	15758.2	1	1	76	841	76	MAX_20210209_lariat_box484_ex259a_6_w1SpinningDisc - Green.tif	BOX759
77	1	93.4013	129.504	1	1	1	91	127	96	132	10	4756.2	2837.8	1	0	77	0	77	MAX_20210209_lariat_box484_ex259a_6_w1SpinningDisc - Green.tif	BOX759
78	1	95.3919	151.865	1	1	1	93	149	98	155	15	20942.9	6296.45	1	1	78	842	78	MAX_20210209_lariat_box484_ex259a_6_w1SpinningDisc - Green.tif	BOX759
79	1	97.3452	91.2749	1	1	1	95	89	100	94	13	17609.2	4498.2	1	0	79	0	79	MAX_20210209_lariat_box484_ex259a_6_w1SpinningDisc - Green.tif	BOX759
80	1	97.9919	108.992	1	1	1	96	107	100	111	5	2927.19	327.25	1	0	80	0	80	MAX_20210209_lariat_box484_ex259a_6_w1SpinningDisc - Green.tif	BOX759
81	1	99.2299	75.9561	1	1	1	97	74	102	78	10	8284.33	4332	1	0	81	0	81	MAX_20210209_lariat_box484_ex259a_6_w1SpinningDisc - Green.tif	BOX759
82	1	100.172	163.087	1	1	1	98	160	103	166	13	14938.7	6376.91	1	1	82	843	82	MAX_20210209_lariat_box484_ex259a_6_w1SpinningDisc - Green.tif	BOX759
83	1	101.685	81.237	1	1	1	99	79	104	84	13	14653.4	4091.8	1	0	83	0	83	MAX_20210209_lariat_box484_ex259a_6_w1SpinningDisc - Green.tif	BOX759
84	1	100.47	170.507	1	1	1	99	169	102	172	4	2349.33	706.667	1	0	84	0	84	MAX_20210209_lariat_box484_ex259a_6_w1SpinningDisc - Green.tif	BOX759
85	1	100.465	187.94	1	1	1	99	186	102	190	6	2837.86	794.857	1	0	85	0	85	MAX_20210209_lariat_box484_ex259a_6_w1SpinningDisc - Green.tif	BOX759
86	1	101.477	121.926	1	1	1	100	119	103	125	10	5604.11	1175.33	1	0	86	0	86	MAX_20210209_lariat_box484_ex259a_6_w1SpinningDisc - Green.tif	BOX759
87	1	102.574	110.324	1	1	1	101	108	104	113	7	2926	129	1	0	87	0	87	MAX_20210209_lariat_box484_ex259a_6_w1SpinningDisc - Green.tif	BOX759
88	1	105.323	133.389	1	1	1	102	131	109	137	21	26109.6	10327.5	1	0	88	0	88	MAX_20210209_lariat_box484_ex259a_6_w1SpinningDisc - Green.tif	BOX759
89	1	105.287	174.767	1	1	1	102	172	109	177	14	15348	4384	1	0	89	0	89	MAX_20210209_lariat_box484_ex259a_6_w1SpinningDisc - Green.tif	BOX759
90	1	105.218	144.708	1	1	1	103	142	108	148	14	21222.5	9621.73	1	1	90	844	90	MAX_20210209_lariat_box484_ex259a_6_w1SpinningDisc - Green.tif	BOX759
91	1	105.521	182.86	1	1	1	104	181	107	185	6	3719.29	1794.14	1	0	91	0	91	MAX_20210209_lariat_box484_ex259a_6_w1SpinningDisc - Green.tif	BOX759
92	1	108.139	83.0597	1	1	1	106	81	110	85	8	5010.25	1160.25	1	0	92	0	92	MAX_20210209_lariat_box484_ex259a_6_w1SpinningDisc - Green.tif	BOX759
93	1	108.516	117.797	1	1	1	106	115	111	120	9	6061.4	2068	1	0	93	0	93	MAX_20210209_lariat_box484_ex259a_6_w1SpinningDisc - Green.tif	BOX759
94	1	107.519	129.078	1	1	1	106	127	109	131	6	3452.14	653.714	1	0	94	0	94	MAX_20210209_lariat_box484_ex259a_6_w1SpinningDisc - Green.tif	BOX759
95	1	111.069	169.002	1	1	1	109	166	113	172	11	7582	3822.25	1	0	95	0	95	MAX_20210209_lariat_box484_ex259a_6_w1SpinningDisc - Green.tif	BOX759
96	1	111.967	103.823	1	1	1	110	101	114	106	10	6304.67	2825.33	1	0	96	0	96	MAX_20210209_lariat_box484_ex259a_6_w1SpinningDisc - Green.tif	BOX759
97	1	111.852	183.746	1	1	1	110	181	114	187	12	10500.2	4561.5	1	0	97	0	97	MAX_20210209_lariat_box484_ex259a_6_w1SpinningDisc - Green.tif	BOX759
98	1	112.917	67.5113	1	1	1	111	65	115	70	8	4484.67	746.667	1	0	98	0	98	MAX_20210209_lariat_box484_ex259a_6_w1SpinningDisc - Green.tif	BOX759
99	1	112.428	190.459	1	1	1	111	189	114	192	4	1649.33	41	1	0	99	0	99	MAX_20210209_lariat_box484_ex259a_6_w1SpinningDisc - Green.tif	BOX759
100	1	115.029	132.657	1	1	1	112	130	118	136	15	21787.5	8926.42	1	1	100	845	100	MAX_20210209_lariat_box484_ex259a_6_w1SpinningDisc - Green.tif	BOX759
101	1	115.331	169.338	1	1	1	113	167	117	172	9	6780	3200.33	1	0	101	0	101	MAX_20210209_lariat_box484_ex259a_6_w1SpinningDisc - Green.tif	BOX759
102	1	118.378	73.4624	1	1	1	116	70	121	78	17	21419.2	7559.92	1	0	102	0	102	MAX_20210209_lariat_box484_ex259a_6_w1SpinningDisc - Green.tif	BOX759
103	1	122.703	106.727	1	1	1	118	104	127	110	24	35832	14361.3	1	1	103	847	103	MAX_20210209_lariat_box484_ex259a_6_w1SpinningDisc - Green.tif	BOX759
104	1	120.17	118.73	1	1	1	118	116	122	121	9	5808.33	2099.33	1	0	104	0	104	MAX_20210209_lariat_box484_ex259a_6_w1SpinningDisc - Green.tif	BOX759
105	1	120.517	126.161	1	1	1	118	123	123	130	16	14626	6207	1	0	105	0	105	MAX_20210209_lariat_box484_ex259a_6_w1SpinningDisc - Green.tif	BOX759
106	1	121.223	166.977	1	1	1	118	164	124	170	17	38083.8	16304.4	1	1	106	846	106	MAX_20210209_lariat_box484_ex259a_6_w1SpinningDisc - Green.tif	BOX759
107	1	122.145	155.865	1	1	1	120	153	124	159	10	6397	768.5	1	0	107	0	107	MAX_20210209_lariat_box484_ex259a_6_w1SpinningDisc - Green.tif	BOX759
108	1	123.152	89.5009	1	1	1	121	87	125	92	10	8715.67	2768	1	0	108	0	108	MAX_20210209_lariat_box484_ex259a_6_w1SpinningDisc - Green.tif	BOX759
109	1	123.711	175.954	1	1	1	122	174	126	178	7	5682.62	2207.12	1	0	109	0	109	MAX_20210209_lariat_box484_ex259a_6_w1SpinningDisc - Green.tif	BOX759
110	1	125.891	183.103	1	1	1	124	181	128	186	10	7044.33	2110	1	0	110	0	110	MAX_20210209_lariat_box484_ex259a_6_w1SpinningDisc - Green.tif	BOX759
111	1	127.61	119.235	1	1	1	125	116	130	122	14	12917	5375.91	1	0	111	0	111	MAX_20210209_lariat_box484_ex259a_6_w1SpinningDisc - Green.tif	BOX759
112	1	129.147	82.0394	1	1	1	126	78	132	87	22	57779	28619.3	1	1	112	848	112	MAX_20210209_lariat_box484_ex259a_6_w1SpinningDisc - Green.tif	BOX759
113	1	127.927	177.57	1	1	1	126	175	130	180	8	6877	2060.33	1	0	113	0	113	MAX_20210209_lariat_box484_ex259a_6_w1SpinningDisc - Green.tif	BOX759
114	1	129.205	131.065	1	1	1	127	128	132	134	13	17501	7587.64	1	1	114	849	114	MAX_20210209_lariat_box484_ex259a_6_w1SpinningDisc - Green.tif	BOX759
115	1	128.953	145.53	1	1	1	127	144	131	147	4	1613	756.286	1	0	115	0	115	MAX_20210209_lariat_box484_ex259a_6_w1SpinningDisc - Green.tif	BOX759
116	1	129.996	154.715	1	1	1	128	152	132	158	13	16096.2	6431.5	1	1	116	850	116	MAX_20210209_lariat_box484_ex259a_6_w1SpinningDisc - Green.tif	BOX759
117	1	132.267	93.0182	1	1	1	129	90	135	96	17	44965.8	18953.2	1	1	117	851	117	MAX_20210209_lariat_box484_ex259a_6_w1SpinningDisc - Green.tif	BOX759
118	1	133.562	68.2602	1	1	1	132	66	136	71	8	4413.67	1609	1	0	118	0	118	MAX_20210209_lariat_box484_ex259a_6_w1SpinningDisc - Green.tif	BOX759
119	1	134.862	163.072	1	1	1	133	161	137	165	8	3421.31	929.812	1	0	119	0	119	MAX_20210209_lariat_box484_ex259a_6_w1SpinningDisc - Green.tif	BOX759
120	1	137.095	131.923	1	1	1	134	128	140	136	19	19630.8	10160.2	1	1	120	852	120	MAX_20210209_lariat_box484_ex259a_6_w1SpinningDisc - Green.tif	BOX759
121	1	137.81	175.767	1	1	1	135	173	141	179	15	32794.3	12961.5	1	1	121	853	121	MAX_20210209_lariat_box484_ex259a_6_w1SpinningDisc - Green.tif	BOX759
122	1	139.254	79.7244	1	1	1	137	77	142	83	14	19430.7	7379.82	1	1	122	854	122	MAX_20210209_lariat_box484_ex259a_6_w1SpinningDisc - Green.tif	BOX759
123	1	140.551	121.236	1	1	1	139	119	142	123	5	2610	330.429	1	0	123	0	123	MAX_20210209_lariat_box484_ex259a_6_w1SpinningDisc - Green.tif	BOX759
124	1	142.023	139.181	1	1	1	140	137	144	142	10	8906.67	4672.67	1	0	124	0	124	MAX_20210209_lariat_box484_ex259a_6_w1SpinningDisc - Green.tif	BOX759
125	1	142.44	186.444	1	1	1	140	184	145	189	12	11373.8	5751	1	1	125	855	125	MAX_20210209_lariat_box484_ex259a_6_w1SpinningDisc - Green.tif	BOX759
126	1	143.608	167.048	1	1	1	141	164	146	170	16	28586.9	13259.5	1	1	126	856	126	MAX_20210209_lariat_box484_ex259a_6_w1SpinningDisc - Green.tif	BOX759
127	1	145.135	127.426	1	1	1	142	122	148	132	23	50033.9	21941.9	1	1	127	857	127	MAX_20210209_lariat_box484_ex259a_6_w1SpinningDisc - Green.tif	BOX759
128	1	145.248	111.993	1	1	1	143	110	147	114	7	3299.81	1256.5	1	0	128	0	128	MAX_20210209_lariat_box484_ex259a_6_w1SpinningDisc - Green.tif	BOX759
129	1	149.321	178.701	1	1	1	147	176	152	181	10	9205.6	4249.2	1	0	129	0	129	MAX_20210209_lariat_box484_ex259a_6_w1SpinningDisc - Green.tif	BOX759
130	1	150.425	132.012	1	1	1	148	129	153	135	16	38566.5	17474.7	1	1	130	858	130	MAX_20210209_lariat_box484_ex259a_6_w1SpinningDisc - Green.tif	BOX759
131	1	149.799	158.973	1	1	1	148	157	151	161	4	1992.86	229.571	1	0	131	0	131	MAX_20210209_lariat_box484_ex259a_6_w1SpinningDisc - Green.tif	BOX759
132	1	149.821	167.606	1	1	1	148	165	152	170	7	4326	1248.33	1	0	132	0	132	MAX_20210209_lariat_box484_ex259a_6_w1SpinningDisc - Green.tif	BOX759
133	1	152.016	107.476	1	1	1	149	105	155	110	16	25558.9	12788.6	1	1	133	859	133	MAX_20210209_lariat_box484_ex259a_6_w1SpinningDisc - Green.tif	BOX759
134	1	151.794	78.5251	1	1	1	150	76	154	81	10	9659.67	3120	1	0	134	0	134	MAX_20210209_lariat_box484_ex259a_6_w1SpinningDisc - Green.tif	BOX759
135	1	152.534	93.4578	1	1	1	150	91	155	96	12	10758.4	4533.6	1	0	135	0	135	MAX_20210209_lariat_box484_ex259a_6_w1SpinningDisc - Green.tif	BOX759
136	1	156.246	79.07	1	1	1	154	77	158	81	7	5288.25	798.375	1	0	136	0	136	MAX_20210209_lariat_box484_ex259a_6_w1SpinningDisc - Green.tif	BOX759
137	1	156.939	150.592	1	1	1	154	148	160	154	17	26142.5	11473.7	1	1	137	862	137	MAX_20210209_lariat_box484_ex259a_6_w1SpinningDisc - Green.tif	BOX759
138	1	156.408	180.061	1	1	1	154	177	159	183	17	30003.5	13506.6	1	1	138	861	138	MAX_20210209_lariat_box484_ex259a_6_w1SpinningDisc - Green.tif	BOX759
139	1	159.47	122.852	1	1	1	157	121	162	125	8	7049	3031.33	1	0	139	0	139	MAX_20210209_lariat_box484_ex259a_6_w1SpinningDisc - Green.tif	BOX759
140	1	160.097	116.119	1	1	1	158	114	163	119	11	14172.6	7075.4	1	1	140	863	140	MAX_20210209_lariat_box484_ex259a_6_w1SpinningDisc - Green.tif	BOX759
141	1	162.366	129.983	1	1	1	160	128	164	132	7	5094.19	1077.62	1	0	141	0	141	MAX_20210209_lariat_box484_ex259a_6_w1SpinningDisc - Green.tif	BOX759
142	1	163.334	70.3393	1	1	1	162	69	165	72	3	1307	246.333	1	0	142	0	142	MAX_20210209_lariat_box484_ex259a_6_w1SpinningDisc - Green.tif	BOX759
143	1	164.049	122.619	1	1	1	162	121	166	125	7	6424.44	2849.19	1	0	143	0	143	MAX_20210209_lariat_box484_ex259a_6_w1SpinningDisc - Green.tif	BOX759
144	1	164.385	190.38	1	1	1	162	188	167	193	13	15174.6	6960.4	1	1	144	864	144	MAX_20210209_lariat_box484_ex259a_6_w1SpinningDisc - Green.tif	BOX759
145	1	165.737	171.391	1	1	1	163	169	168	175	13	18877.9	7901.55	1	1	145	865	145	MAX_20210209_lariat_box484_ex259a_6_w1SpinningDisc - Green.tif	BOX759
146	1	168.69	117.735	1	1	1	166	115	171	121	14	17177.7	6789.27	1	1	146	866	146	MAX_20210209_lariat_box484_ex259a_6_w1SpinningDisc - Green.tif	BOX759
147	1	170.313	126.808	1	1	1	166	123	174	130	20	35509	16237.2	1	1	147	867	147	MAX_20210209_lariat_box484_ex259a_6_w1SpinningDisc - Green.tif	BOX759
148	1	168.774	81.8087	1	1	1	167	80	171	84	6	3553.31	1622.25	1	0	148	0	148	MAX_20210209_lariat_box484_ex259a_6_w1SpinningDisc - Green.tif	BOX759
149	1	170.887	91.6577	1	1	1	169	90	173	94	7	3836.5	1998.44	1	0	149	0	149	MAX_20210209_lariat_box484_ex259a_6_w1SpinningDisc - Green.tif	BOX759
150	1	172.053	174.316	1	1	1	169	171	175	177	17	43625.8	20357.5	1	1	150	868	150	MAX_20210209_lariat_box484_ex259a_6_w1SpinningDisc - Green.tif	BOX759
151	1	171.603	103.128	1	1	1	170	101	173	105	5	2297.71	504.143	1	0	151	0	151	MAX_20210209_lariat_box484_ex259a_6_w1SpinningDisc - Green.tif	BOX759
152	1	174.944	86.0616	1	1	1	172	83	178	89	14	11828.1	4716.25	1	0	152	0	152	MAX_20210209_lariat_box484_ex259a_6_w1SpinningDisc - Green.tif	BOX759
153	1	174.996	111.002	1	1	1	172	108	178	114	13	15813.1	5827.17	1	0	153	0	153	MAX_20210209_lariat_box484_ex259a_6_w1SpinningDisc - Green.tif	BOX759
154	1	178.826	135.816	1	1	1	176	133	182	139	15	26025.2	12118.1	1	1	154	870	154	MAX_20210209_lariat_box484_ex259a_6_w1SpinningDisc - Green.tif	BOX759
155	1	181.749	96.963	1	1	1	179	94	184	100	15	31771.6	13465.4	1	1	155	871	155	MAX_20210209_lariat_box484_ex259a_6_w1SpinningDisc - Green.tif	BOX759
156	1	181.072	115.764	1	1	1	179	113	183	119	12	12869.8	5265.5	1	0	156	0	156	MAX_20210209_lariat_box484_ex259a_6_w1SpinningDisc - Green.tif	BOX759
157	1	182.475	129.954	1	1	1	180	128	185	132	8	5782.67	1873.67	1	0	157	0	157	MAX_20210209_lariat_box484_ex259a_6_w1SpinningDisc - Green.tif	BOX759
158	1	185.238	194.938	1	1	1	183	193	187	197	7	3620.12	919.688	1	0	158	0	158	MAX_20210209_lariat_box484_ex259a_6_w1SpinningDisc - Green.tif	BOX759
159	1	187.52	95.6046	1	1	1	185	91	190	99	19	37619.4	18053.2	1	1	159	872	159	MAX_20210209_lariat_box484_ex259a_6_w1SpinningDisc - Green.tif	BOX759
160	1	187.745	110.302	1	1	1	185	108	190	113	10	7927	2689.6	1	0	160	0	160	MAX_20210209_lariat_box484_ex259a_6_w1SpinningDisc - Green.tif	BOX759
161	1	188.027	182.134	1	1	1	185	179	191	185	17	37690.8	18358.6	1	1	161	873	161	MAX_20210209_lariat_box484_ex259a_6_w1SpinningDisc - Green.tif	BOX759
162	1	189.304	114.685	1	1	1	188	113	191	116	3	970	237	1	0	162	0	162	MAX_20210209_lariat_box484_ex259a_6_w1SpinningDisc - Green.tif	BOX759
163	1	192.089	136.146	1	1	1	188	133	196	140	23	51216.6	22395.4	1	1	163	875	163	MAX_20210209_lariat_box484_ex259a_6_w1SpinningDisc - Green.tif	BOX759
164	1	190.825	76.4408	1	1	1	189	74	193	79	7	4474.67	1344	1	0	164	0	164	MAX_20210209_lariat_box484_ex259a_6_w1SpinningDisc - Green.tif	BOX759
165	1	193.222	128.194	1	1	1	190	125	196	131	15	31713.5	11145.1	1	1	165	874	165	MAX_20210209_lariat_box484_ex259a_6_w1SpinningDisc - Green.tif	BOX759
166	1	192.582	195.726	1	1	1	191	194	194	198	5	2418	610.143	1	0	166	0	166	MAX_20210209_lariat_box484_ex259a_6_w1SpinningDisc - Green.tif	BOX759
167	1	198.018	107.519	1	1	1	195	105	201	110	16	27467.9	10414.6	1	1	167	876	167	MAX_20210209_lariat_box484_ex259a_6_w1SpinningDisc - Green.tif	BOX759
168	1	196.703	115.174	1	1	1	195	113	199	118	8	5509.67	2440.67	1	0	168	0	168	MAX_20210209_lariat_box484_ex259a_6_w1SpinningDisc - Green.tif	BOX759
169	1	196.463	210.46	1	1	1	195	209	198	212	4	1078.67	366	1	0	169	0	169	MAX_20210209_lariat_box484_ex259a_6_w1SpinningDisc - Green.tif	BOX759
170	1	199.512	74.5239	1	1	1	197	72	202	77	8	5646.4	3869	1	0	170	0	170	MAX_20210209_lariat_box484_ex259a_6_w1SpinningDisc - Green.tif	BOX759
171	1	200.474	198.504	1	1	1	199	197	202	200	4	1664	454.667	1	0	171	0	171	MAX_20210209_lariat_box484_ex259a_6_w1SpinningDisc - Green.tif	BOX759
172	1	201.471	112.426	1	1	1	200	111	203	114	4	1830	648.667	1	0	172	0	172	MAX_20210209_lariat_box484_ex259a_6_w1SpinningDisc - Green.tif	BOX759
173	1	202.996	93.5847	1	1	1	201	91	205	97	13	13549	7143	1	1	173	877	173	MAX_20210209_lariat_box484_ex259a_6_w1SpinningDisc - Green.tif	BOX759
174	1	202.459	119.924	1	1	1	201	118	204	122	6	2944.43	96.2857	1	0	174	0	174	MAX_20210209_lariat_box484_ex259a_6_w1SpinningDisc - Green.tif	BOX759
175	1	203.554	129.376	1	1	1	201	127	206	132	11	8216.4	3267.2	1	0	175	0	175	MAX_20210209_lariat_box484_ex259a_6_w1SpinningDisc - Green.tif	BOX759
176	1	204.678	134.774	1	1	1	202	132	207	138	14	13149.3	5589.27	1	0	176	0	176	MAX_20210209_lariat_box484_ex259a_6_w1SpinningDisc - Green.tif	BOX759
177	1	204.745	189.855	1	1	1	202	187	207	193	14	14751.8	5390.36	1	1	177	879	177	MAX_20210209_lariat_box484_ex259a_6_w1SpinningDisc - Green.tif	BOX759
178	1	203.999	200.904	1	1	1	202	199	206	203	5	3279.56	813.375	1	0	178	0	178	MAX_20210209_lariat_box484_ex259a_6_w1SpinningDisc - Green.tif	BOX759
179	1	206.506	179.553	1	1	1	204	177	209	182	12	9779.2	7829.6	1	1	179	878	179	MAX_20210209_lariat_box484_ex259a_6_w1SpinningDisc - Green.tif	BOX759
180	1	208.054	84.5316	1	1	1	206	82	210	87	8	5984	2075	1	0	180	0	180	MAX_20210209_lariat_box484_ex259a_6_w1SpinningDisc - Green.tif	BOX759
181	1	208.988	149.972	1	1	1	207	147	211	153	11	8122.75	6272.5	1	1	181	880	181	MAX_20210209_lariat_box484_ex259a_6_w1SpinningDisc - Green.tif	BOX759
182	1	208.931	204.161	1	1	1	207	202	211	207	10	6977	1660	1	0	182	0	182	MAX_20210209_lariat_box484_ex259a_6_w1SpinningDisc - Green.tif	BOX759
183	1	211.165	139.13	1	1	1	209	136	214	142	13	15305.9	7646.91	1	1	183	881	183	MAX_20210209_lariat_box484_ex259a_6_w1SpinningDisc - Green.tif	BOX759
184	1	212.695	89.3184	1	1	1	210	87	215	92	13	18582.6	8782.2	1	1	184	882	184	MAX_20210209_lariat_box484_ex259a_6_w1SpinningDisc - Green.tif	BOX759
185	1	216.889	202.83	1	1	1	214	200	220	206	15	29410.8	10649.8	1	1	185	883	185	MAX_20210209_lariat_box484_ex259a_6_w1SpinningDisc - Green.tif	BOX759
186	1	217.398	101.986	1	1	1	215	99	220	105	16	24987.1	8675.36	1	1	186	884	186	MAX_20210209_lariat_box484_ex259a_6_w1SpinningDisc - Green.tif	BOX759
187	1	222.693	202.005	1	1	1	220	199	225	205	14	18595.9	8521.45	1	1	187	887	187	MAX_20210209_lariat_box484_ex259a_6_w1SpinningDisc - Green.tif	BOX759
188	1	225.896	95.3257	1	1	1	223	92	228	98	14	23645.4	10563.1	1	1	188	888	188	MAX_20210209_lariat_box484_ex259a_6_w1SpinningDisc - Green.tif	BOX759
189	1	225.305	214.108	1	1	1	223	212	228	216	9	4553.33	1496.67	1	0	189	0	189	MAX_20210209_lariat_box484_ex259a_6_w1SpinningDisc - Green.tif	BOX759
190	1	227.17	124.92	1	1	1	224	122	230	128	18	37945.6	18049.9	1	1	190	889	190	MAX_20210209_lariat_box484_ex259a_6_w1SpinningDisc - Green.tif	BOX759
191	1	226.663	140.231	1	1	1	224	137	229	143	14	21868.5	10213.5	1	1	191	890	191	MAX_20210209_lariat_box484_ex259a_6_w1SpinningDisc - Green.tif	BOX759
192	1	229.948	98.7361	1	1	1	228	96	232	101	10	8777.67	3831.67	1	0	192	0	192	MAX_20210209_lariat_box484_ex259a_6_w1SpinningDisc - Green.tif	BOX759
193	1	230.908	187.913	1	1	1	228	185	234	191	16	15160.8	10174.1	1	1	193	891	193	MAX_20210209_lariat_box484_ex259a_6_w1SpinningDisc - Green.tif	BOX759
194	1	234.579	133.696	1	1	1	233	132	236	136	5	2922.14	1768.57	1	0	194	0	194	MAX_20210209_lariat_box484_ex259a_6_w1SpinningDisc - Green.tif	BOX759
195	1	234.728	160.192	1	1	1	233	158	237	163	8	4832.67	2029.67	1	0	195	0	195	MAX_20210209_lariat_box484_ex259a_6_w1SpinningDisc - Green.tif	BOX759
196	1	235.904	127.77	1	1	1	234	125	238	131	12	10958	2821.75	1	0	196	0	196	MAX_20210209_lariat_box484_ex259a_6_w1SpinningDisc - Green.tif	BOX759
197	1	237.973	119.673	1	1	1	235	117	241	123	17	25314.7	15919.9	1	1	197	892	197	MAX_20210209_lariat_box484_ex259a_6_w1SpinningDisc - Green.tif	BOX759
198	1	239.029	194.461	1	1	1	236	192	242	197	16	38508.9	16872.9	1	1	198	893	198	MAX_20210209_lariat_box484_ex259a_6_w1SpinningDisc - Green.tif	BOX759
199	1	240.07	201.62	1	1	1	237	198	243	205	20	77661.5	36811.5	1	1	199	894	199	MAX_20210209_lariat_box484_ex259a_6_w1SpinningDisc - Green.tif	BOX759
200	1	241.195	151.715	1	1	1	238	149	244	155	18	48418.9	22349.6	1	1	200	895	200	MAX_20210209_lariat_box484_ex259a_6_w1SpinningDisc - Green.tif	BOX759
201	1	242.551	139.935	1	1	1	240	137	245	143	17	24355.2	9355.18	1	1	201	897	201	MAX_20210209_lariat_box484_ex259a_6_w1SpinningDisc - Green.tif	BOX759
202	1	243.07	125.62	1	1	1	241	123	245	128	9	7435.33	3037.67	1	0	202	0	202	MAX_20210209_lariat_box484_ex259a_6_w1SpinningDisc - Green.tif	BOX759
203	1	244.985	178.115	1	1	1	242	175	248	181	18	19326.6	13939.7	1	1	203	898	203	MAX_20210209_lariat_box484_ex259a_6_w1SpinningDisc - Green.tif	BOX759
204	1	245.688	215.65	1	1	1	244	214	247	217	3	1555.33	366.667	1	0	204	0	204	MAX_20210209_lariat_box484_ex259a_6_w1SpinningDisc - Green.tif	BOX759
205	1	247.446	131.226	1	1	1	245	129	250	134	9	7191.8	1688.4	1	0	205	0	205	MAX_20210209_lariat_box484_ex259a_6_w1SpinningDisc - Green.tif	BOX759
206	1	247.456	188.474	1	1	1	245	186	250	191	12	8188.8	2062.8	1	0	206	0	206	MAX_20210209_lariat_box484_ex259a_6_w1SpinningDisc - Green.tif	BOX759
207	1	247.675	100.685	1	1	1	246	99	249	102	3	1465.33	319	1	0	207	0	207	MAX_20210209_lariat_box484_ex259a_6_w1SpinningDisc - Green.tif	BOX759
208	1	249.133	223.469	1	1	1	247	220	251	227	16	13685.5	3946.18	1	0	208	0	208	MAX_20210209_lariat_box484_ex259a_6_w1SpinningDisc - Green.tif	BOX759
209	1	250.568	108.422	1	1	1	248	106	253	111	11	8503.4	3186	1	0	209	0	209	MAX_20210209_lariat_box484_ex259a_6_w1SpinningDisc - Green.tif	BOX759
210	1	249.801	125.615	1	1	1	248	123	252	128	9	6848.67	3077.33	1	0	210	0	210	MAX_20210209_lariat_box484_ex259a_6_w1SpinningDisc - Green.tif	BOX759
211	1	251.669	212.324	1	1	1	248	210	255	215	18	54358	29015	1	1	211	899	211	MAX_20210209_lariat_box484_ex259a_6_w1SpinningDisc - Green.tif	BOX759
212	1	252.176	120.129	1	1	1	250	118	255	123	11	12984	7427	1	1	212	900	212	MAX_20210209_lariat_box484_ex259a_6_w1SpinningDisc - Green.tif	BOX759
213	1	251.649	135.384	1	1	1	250	133	254	138	9	6752.33	1565.67	1	0	213	0	213	MAX_20210209_lariat_box484_ex259a_6_w1SpinningDisc - Green.tif	BOX759
214	1	253.985	97.2001	1	1	1	252	95	256	100	10	6120.33	1918.67	1	0	214	0	214	MAX_20210209_lariat_box484_ex259a_6_w1SpinningDisc - Green.tif	BOX759
215	1	255.714	128.89	1	1	1	253	126	258	132	15	24710.8	10273.5	1	1	215	901	215	MAX_20210209_lariat_box484_ex259a_6_w1SpinningDisc - Green.tif	BOX759
216	1	255.144	152.542	1	1	1	253	148	257	156	11	7805.75	2356.75	1	0	216	0	216	MAX_20210209_lariat_box484_ex259a_6_w1SpinningDisc - Green.tif	BOX759
217	1	257.189	207.214	1	1	1	254	204	260	210	15	47138.6	23672.3	1	1	217	902	217	MAX_20210209_lariat_box484_ex259a_6_w1SpinningDisc - Green.tif	BOX759
218	1	257.539	168.951	1	1	1	255	166	260	172	16	28422	13964.4	1	1	218	903	218	MAX_20210209_lariat_box484_ex259a_6_w1SpinningDisc - Green.tif	BOX759
219	1	257.441	139.488	1	1	1	256	138	259	141	4	2010	363	1	0	219	0	219	MAX_20210209_lariat_box484_ex259a_6_w1SpinningDisc - Green.tif	BOX759
220	1	257.499	232.469	1	1	1	256	231	259	234	4	1743	1172.33	1	0	220	0	220	MAX_20210209_lariat_box484_ex259a_6_w1SpinningDisc - Green.tif	BOX759
221	1	259.196	146.463	1	1	1	257	144	262	149	14	16605	8805	1	1	221	904	221	MAX_20210209_lariat_box484_ex259a_6_w1SpinningDisc - Green.tif	BOX759
222	1	261.208	219.325	1	1	1	258	217	264	222	14	17472.1	8017.91	1	1	222	905	222	MAX_20210209_lariat_box484_ex259a_6_w1SpinningDisc - Green.tif	BOX759
223	1	262.978	140.39	1	1	1	260	138	266	143	14	19385.5	7492.27	1	1	223	906	223	MAX_20210209_lariat_box484_ex259a_6_w1SpinningDisc - Green.tif	BOX759
224	1	263.96	183.245	1	1	1	261	180	267	186	15	20430	9289.67	1	1	224	907	224	MAX_20210209_lariat_box484_ex259a_6_w1SpinningDisc - Green.tif	BOX759
225	1	264.766	113.767	1	1	1	262	111	267	117	14	18574.8	8251.18	1	1	225	908	225	MAX_20210209_lariat_box484_ex259a_6_w1SpinningDisc - Green.tif	BOX759
226	1	265.843	125.801	1	1	1	263	123	268	129	13	15916.6	6427.91	1	1	226	910	226	MAX_20210209_lariat_box484_ex259a_6_w1SpinningDisc - Green.tif	BOX759
227	1	266.193	231.948	1	1	1	263	229	269	235	18	40766.6	19868.5	1	1	227	909	227	MAX_20210209_lariat_box484_ex259a_6_w1SpinningDisc - Green.tif	BOX759
228	1	266.786	168.1	1	1	1	264	166	269	171	11	11417.4	5745.4	1	0	228	0	228	MAX_20210209_lariat_box484_ex259a_6_w1SpinningDisc - Green.tif	BOX759
229	1	268.459	220.336	1	1	1	266	218	271	223	13	18874.6	7676.6	1	1	229	911	229	MAX_20210209_lariat_box484_ex259a_6_w1SpinningDisc - Green.tif	BOX759
230	1	270.942	112.908	1	1	1	269	110	273	116	11	10431	4159.25	1	0	230	0	230	MAX_20210209_lariat_box484_ex259a_6_w1SpinningDisc - Green.tif	BOX759
231	1	270.898	194.146	1	1	1	269	192	273	196	8	4142.62	1930.5	1	0	231	0	231	MAX_20210209_lariat_box484_ex259a_6_w1SpinningDisc - Green.tif	BOX759
232	1	272.777	207.483	1	1	1	270	205	276	211	18	52325.9	25124.6	1	1	232	912	232	MAX_20210209_lariat_box484_ex259a_6_w1SpinningDisc - Green.tif	BOX759
233	1	272.463	241.962	1	1	1	270	240	275	244	8	4478.67	1108.33	1	0	233	0	233	MAX_20210209_lariat_box484_ex259a_6_w1SpinningDisc - Green.tif	BOX759
234	1	272.223	237.311	1	1	1	271	236	274	239	3	1346	449.333	1	0	234	0	234	MAX_20210209_lariat_box484_ex259a_6_w1SpinningDisc - Green.tif	BOX759
235	1	274.899	130.343	1	1	1	272	128	277	133	13	17927	6771.2	1	1	235	913	235	MAX_20210209_lariat_box484_ex259a_6_w1SpinningDisc - Green.tif	BOX759
236	1	274.948	166.987	1	1	1	272	164	278	170	13	33211.8	13557.5	1	1	236	914	236	MAX_20210209_lariat_box484_ex259a_6_w1SpinningDisc - Green.tif	BOX759
237	1	273.653	218.978	1	1	1	272	217	276	221	7	5492.75	2007.06	1	0	237	0	237	MAX_20210209_lariat_box484_ex259a_6_w1SpinningDisc - Green.tif	BOX759
238	1	275.564	157.858	1	1	1	273	155	278	161	15	16090.5	5921.73	1	0	238	0	238	MAX_20210209_lariat_box484_ex259a_6_w1SpinningDisc - Green.tif	BOX759
239	1	279.216	182.376	1	1	1	276	180	282	185	17	20671.1	10943.9	1	1	239	915	239	MAX_20210209_lariat_box484_ex259a_6_w1SpinningDisc - Green.tif	BOX759
240	1	279.449	126.029	1	1	1	277	124	282	128	8	6438.67	2568.67	1	0	240	0	240	MAX_20210209_lariat_box484_ex259a_6_w1SpinningDisc - Green.tif	BOX759
241	1	279.48	159.42	1	1	1	278	158	281	161	4	1776.67	607.333	1	0	241	0	241	MAX_20210209_lariat_box484_ex259a_6_w1SpinningDisc - Green.tif	BOX759
[truncated: 1,622 more rows]
